# Supplementary material
Source: PubMed Central journal article supplement (PMC3553295)
Supplement: NIHMS416112-supplement-Supp_TableS1.pdf [file NIHMS416112-supplement-Supp_TableS1.pdf]

| Gene Name                                       | Sequence                       | Tm °C | Length (nt) |
|-------------------------------------------------|--------------------------------|-------|-------------|
| GAPDH (=G3PDH) NM_008084.2                      | TTGTCAGCAATGCATCCTGCACCACC     | 61    | 119         |
|                                                 | CTGAGTGGCAGTGATGGCATGGAC       | 61    |             |
| glutamate receptor, ionotropic, AMPA4           | CCCAGTATTCTAGAGGGGTGTTTGCC     | 61    | 123         |
|                                                 | CTTCAGTGGGAAGCTTGGTGTGATG      | 61    |             |
| glutamate receptor, ionotropic, AMPA3 (alpha 3) | CACACGACGCAATACTGGTCATAGCAG    | 61    | 120         |
|                                                 | GACTCCAGGGCACAGCAGGATTTG       | 61    |             |
| glutamate receptor, ionotropic, NMDA2B          | CTGAGACTGAAGAACAGGAAGATGACCATC | 62    | 119         |
|                                                 | CGGACTGTATTCCGCATGCAGG         | 61    |             |
| dopamine receptor D1A                           | GCTGGCTTTTGGCCCTTTGGGTC        | 61    | 123         |
|                                                 | GCTGGAGATAGCCCAATACCTGTCC      | 61    |             |
| dopamine receptor 2                             | CCATCTCTTGCCCACTGCTCTTTGG      | 61    | 122         |
|                                                 | GGTGACGATGAAGGGCACGTAGAAC      | 61    |             |
| glutamate receptor, ionotropic, AMPA1           | GTCAGCGACGGCAAATACGGAGC        | 61    | 120         |
|                                                 | GACCAAGTTATGGTCAAGGGGGC        | 61    |             |
|                                                 | CCTCGCTTGTCACGCCCC             | 60    |             |
| mNR2A                                           | CTCTCGTAGCATAAGCCTCAAGGACAG    | 61    | 123         |
|                                                 | CAGACCTTGGGGGAAAAGGGAGCTTTTG   | 61    |             |
| mDARPP32                                        | AGACCCACAGGGCAGGTCCTAAG        | 61    | 126         |
|                                                 | GTTGAAGTCTATGAGAGGGTTGGGGAC    | 61    |             |
| GAD65                                           | GAGGGTTACTGATGTCCCGAAACAC      | 61    | 120         |
|                                                 | CCAGGAGAGCTGAACACTGCAAGG       | 61    |             |
| GAD67                                           | TCTCCTATGACACCGGGGACAAGG       | 61    | 129         |
|                                                 | GGCATTGTGATCTGGTTTTCAAATCCCAC  | 60    |             |
| GABA-a1 Gabar1                                  | CCAGTTTCGGACCAGTTTCAGACCAC     | 61    | 120         |
|                                                 | TGTTTAGCCGGAGCACTGTCTATGGG     | 61    |             |
| DGL-alpha                                       | CTCACGCACAGAGCTGCTGGCA         | 60    | 120         |
|                                                 | ATGGTTGCACTTGGTGGTCGCTCAG      | 61    |             |
| DGL-beta                                        | CTGCATGGCTGTTGGTACGGACTG       | 61    | 120         |
|                                                 | GGTTAGAAGTGTCTGCTCTCCAAGAAGA   | 60    |             |
| NAPE-PLD                                        | GGATGAGTATGAGGACAGCCAGTCTC     | 61    | 120         |
|                                                 | GGAGAACCTAGAAGACACACTTCTCC     | 61    |             |
| Choline acetyltransferase                       | GTTATAACCCCCAGCCTGAGGCC        | 61    | 120         |
|                                                 | GGTCTCTCATGTCAACAAGGCTCGC      | 61    |             |
| M1 muscarinic R                                 | AGGAACAATGGCCAAGAGAAAGACCTT    | 60    | 120         |
|                                                 | GCACCATGATGTTATATGGTGTCCAGGT   | 60    |             |
| B2 Nicotinic R                                  | TCCCTCGACGTACCGCTGGTG          | 60    | 115         |
|                                                 | GCGTGGTAGGCGAACGGTGG           | 60    |             |
| GABA-B1                                         | CCGTGGCTTGACTCGCGACC           | 60    | 117         |
|                                                 | AGGCACTTGCGCACCTTGGGC          | 60    |             |
| EAAT1 glial                                     | ACCATTAACATGGATGGGACCGCCC      | 61    | 121         |
|                                                 | CGGCCGTGGCTGTGATGCTTATTG       | 61    |             |
| EAAT2 glial                                     | CATTAACATGGATGGCACAGCCCTTAC    | 60    | 120         |
|                                                 | TGCCCAGGTTTCGGTGCTTTGGC        | 61    |             |
| EAAT3 neuronal                                  | ACTGTCCTGAGCGGGCTTGCAATC       | 61    | 117         |
|                                                 | TGTCAGGAGAGCCTGCGCCATAC        | 61    |             |
| EAAT4 neuronal                                  | GCCTGCAGACCATGACCCGAG          | 60    | 125         |
|                                                 | GAGCTGGTACGGGCGCAAGG           | 60    |             |
| GABA-B1                                         | CCGTGGCTTGACTCGCGACC           | 60    | 117         |
|                                                 | AGGCACTTGCGCACCTTGGGC          | 60    |             |
| GABA transporter                                | CAGGGTGGCATTATGTCTTCAAACCTGTTG | 60    | 123         |
|                                                 | ATAGAACCAGTTGACACCATAAAACCAGG  | 60    |             |
| kainate 5                                       | TCCTGGTTGTCGTTCTCTCGGGC        | 60    | 117         |
|                                                 | AGCCGGCATCTTCTCCCTC            | 60    |             |
| NR1                                             | AACAAGCGCGGACCCAAGGCAG         | 60    | 121         |
|                                                 | CGCTTGAGAAAGGATGATGACCCG       | 61    |             |

|                    |                                   |    |     |
|--------------------|-----------------------------------|----|-----|
| mGluR5             | TGGCTCTGCCCCGGTGCA                | 60 | 121 |
|                    | GAAGCGCTCCTCTGCCTCTGC             | 60 |     |
| 5HT-1d             | CGGTGAACCAGCGGTGACCC              | 60 | 117 |
|                    | TGGTTCTGTCTGTGACGGCTTTG           | 61 |     |
| 5HT-2c             | CGTCGGCGTCGTGGAGATCG              | 60 | 120 |
|                    | TCCAGCATCTCCGCGCCAATCG            | 60 |     |
| vAChT              | TCCTTCGCGCCCTTAGTGGTCTC           | 61 | 120 |
|                    | GCCATAGACTGATACGTGGCGCAC          | 60 |     |
| vGluT1             | AGAAGCGGCAGGAAGGCGCG              | 60 | 120 |
|                    | TGTAGCGACGAGGGAGGCCAAAG           | 61 |     |
| vGluT2             | TTGGTGCTTGCAGTAGGATTCAGTGGATT     | 60 | 120 |
|                    | CAGCGTGCCAACGCCATTTGAAATGC        | 61 |     |
| VIATT              | CGCTGAGGCTACGCGAGGTG              | 60 | 118 |
|                    | CCGAAGCCTCTGTGTGGACATGG           | 61 |     |
| Cnr1; CB1-Receptor | AAGGCTCACAGCCACGCAGTTCG           | 61 | 120 |
|                    | TAATGTCCATGCGGGCTTGGTCAGG         | 61 |     |
| Adra1a             | TGCATCAACCCTATCATATACCCATGCTC     | 60 | 120 |
|                    | AGTGTAGCCAGGGCATGCTTGG            | 61 |     |
| Adra2b             | CCACCCTTGCAAGCCTCAG               | 60 | 120 |
|                    | GCTCAGCTGTGCCGACGGC               | 60 |     |
| Htr1b              | GAACCAAGTCAAAGTGCAGTCTCAGAC       | 61 | 120 |
|                    | GCCAACACACAATAAATGCTCCTAAAATGATCC | 61 |     |
| Htr2a              | GGACGATGCAGTCCATCAGCAACG          | 61 | 120 |
|                    | TGCAGATGACGGCCATGATATTGGTGATG     | 61 |     |
| Gabbr2             | GAAGATTCTGAAGACCTCCACCTCAGTC      | 61 | 120 |
|                    | GTCTTTGTCCAGCTCTGTGATCTTCATTC     | 60 |     |
| Gabrd              | CAGGAAGAAACGGAAGCCAAGGTCAAG       | 61 | 120 |
|                    | GAGATAGCCAACCTCCTGACTGACC         | 61 |     |
| Grik3              | CATCGACTCCAAGGGCTATGGCATC         | 61 | 120 |
|                    | CACTTCTCCTTCATGATGTGCAGTTTGTC     | 60 |     |
| Chrm5              | TGTTCTTCCCAGTGTCCAAAGACCC         | 61 | 120 |
|                    | CAAGTCTGCGCCGCTTTCCTCT            | 61 |     |
| Chrna7             | CGCTGCAGCCTGGCCAGTGTGGAGC         | 60 | 120 |
|                    | AGTCTGGAGTTGGGGCACAGTGC           | 61 |     |
| Sesn3              | CGAATGGTCTACAATCTCACCTACAACAC     | 60 | 120 |
|                    | CATAGTCATCATACTGATTCCAAACATACAGTG | 61 |     |
| Hipk2              | CAGCAGCGCACAGGGCACAAC             | 60 | 120 |
|                    | TTCCTGGCCTGGGTCTTCAGTGG           | 61 |     |
| Add2               | GACCACGTGGATGAAGGCTGATGAAG        | 61 | 120 |
|                    | ATGTCCAGAACTTCTGGGGTTCAG          | 61 |     |
| Kcnb1              | AGACTCATGGAGACCAACCCCATCC         | 61 | 120 |
|                    | GAAGTTAACCTTGAGCGCTCGCAGC         | 61 |     |
| Shc3               | ACGGAAGGACCTCTTTGACATGAAGCC       | 61 | 120 |
|                    | GGGGCTCTGGGTGTGACCG               | 60 |     |
