# Supplementary material
Source: PubMed Central journal article supplement (PMC3553295)
Supplement: NIHMS416112-supplement-Supp_TableS2.pdf [file NIHMS416112-supplement-Supp_TableS2.pdf]

**More Sustained  
Increase Cocaine &  
Withdrawal**

|               |               |               |               |          |
|---------------|---------------|---------------|---------------|----------|
| 0610030E20Rik | 2310021P13Rik | 4933421O10Rik | A330050B17Rik | Adamts6  |
| 0610040F04Rik | 2310035C23Rik | 4933428G20Rik | A330076H08Rik | Adar     |
| 1110038D17Rik | 2410022M11Rik | 5430405G05Rik | A330102I10Rik | Adarb1   |
| 1190007I07Rik | 2510009E07Rik | 5430411K18Rik | A530088E08Rik | Add2     |
| 1300001I01Rik | 2610002M06Rik | 6230409E13Rik | A630066F11Rik | Adra1a   |
| 1300018I17Rik | 2610005M20Rik | 6330403A02Rik | A630072L19Rik | Adrb2    |
| 1500004A13Rik | 2610507B11Rik | 6330403L08Rik | A730061H03Rik | AF529169 |
| 1520402A15Rik | 2700033N17Rik | 6330407J23Rik | A830018L16Rik | Afap111  |
| 1700001G11Rik | 2700081O15Rik | 6430527G18Rik | A830092H15Rik | Aff1     |
| 1700003M07Rik | 2810021J22Rik | 6430548M08Rik | A930003O13Rik | Aff2     |
| 1700007J10Rik | 2900052L18Rik | 6430571L13Rik | A930005I04Rik | Aff3     |
| 1700008J07Rik | 3110057O12Rik | 6430628N08Rik | A930012O16Rik | Agfg1    |
| 1700017B05Rik | 3110062M04Rik | 6720401G13Rik | Abca1         | Agrn     |
| 1700034P13Rik | 4430402I18Rik | 8430419L09Rik | Abca2         | Ahctf1   |
| 1700041B01Rik | 4632419I22Rik | 8430427H17Rik | Abca3         | Ahcyl2   |
| 1700081L11Rik | 4732416N19Rik | 9130019O22Rik | Abcb1a        | Ahnak    |
| 1700084E18Rik | 4732418C07Rik | 9330161L09Rik | Abcc5         | AI480526 |
| 1700094C10Rik | 4732440D04Rik | 9330162012Rik | Abcg4         | AI480653 |
| 1700109K24Rik | 4921504A21Rik | 9330182L06Rik | Abhd2         | AI987944 |
| 1700110K17Rik | 4921525B02Rik | 9430020K01Rik | Abl1          | Akap12   |
| 1810012P15Rik | 4930402H24Rik | 9430031J16Rik | Ablim1        | Akap13   |
| 1810032O08Rik | 4930417G10Rik | 9430069I07Rik | Abr           | Akap5    |
| 1810041L15Rik | 4930470G03Rik | 9530080O11Rik | Acap2         | Akap6    |
| 1810062O18Rik | 4930500M09Rik | 9630013A20Rik | Ache          | Akap9    |
| 2210009G21Rik | 4930528A17Rik | 9830001H06Rik | Acss2         | Alk      |
| 2210012G02Rik | 4931406P16Rik | 9930013L23Rik | Actn1         | Aloxe3   |
| 2310004I24Rik | 4931413K12Rik | A130022J15Rik | Acvr1b        | Ambra1   |
| 2310014H01Rik | 4931422A03Rik | A230004M16Rik | Acvr2b        | Amigo3   |
| 2310015A10Rik | 4932418E24Rik | A230056P14Rik | Adam11        | Ammecr11 |
|               | 4932702P03Rik | A230059L01Rik | Adam12        | Amotl1   |
|               | 4933407H18Rik | A230103J11Rik | Adamts10      | Anapc1   |
|               | 4933407K13Rik | A330033J07Rik | Adamts4       | Ank1     |

|           |         |               |               |           |
|-----------|---------|---------------|---------------|-----------|
| Ank3      | Arhgef9 | Atp2b4        | BC026590      | Cabin1    |
| Ankfn1    | Arid1a  | Atp6v0a2      | BC031353      | Cachd1    |
| Ankle2    | Arid3a  | Atp7b         | BC037032      | Cacna1a   |
| Ankrd17   | Arid5a  | Atp8a2        | BC049265      | Cacna1c   |
| Ankrd26   | Arih1   | Atrn          | BC049635      | Cacna1d   |
| Ankrd28   | Armc5   | Atxn1         | BC051142      | Cacna1e   |
| Ankrd33b  | Armc9   | Atxn7         | BC058420      | Cacnb1    |
| Ankrd42   | Arnt2   | Atxn7l1       | BC061253      | Cadm3     |
| Ankrd43   | Arsk    | AW011738      | BC068281      | Camk1d    |
| Ankrd44   | Asap1   | AW555464      | Bcam          | Camk4     |
| Ankrd50   | Asap2   | Axin2         | Bcl9          | Camsap1   |
| Ankrd52   | Asap3   | Axl           | Bcl9l         | Capn5     |
| Ankrd6    | Asb13   | B230119M05Rik | Bcor          | Caskin1   |
| Anks6     | Ascc3   | B230206H07Rik | Bicd2         | Cast      |
| Ap1g1     | Ash1l   | B230307C23Rik | Bmp6          | Catsperg1 |
| Ap3b2     | Astn1   | B930095G15Rik | Bmpr2         | Cav2      |
| Ap3d1     | Asxl1   | Bace1         | Bptf          | Cbll1     |
| Apba1     | Asxl2   | Bach1         | Braf          | Cbln4     |
| Apc2      | Atad2b  | Bach2         | Bsn           | Cc2d1a    |
| Apcdd1    | Atf6    | Bahcc1        | Btbd3         | Ccdc141   |
| Aqp4      | Atf7ip  | Bai2          | Btbd7         | Ccdc159   |
| Arfgef2   | Atg14   | Baz1b         | Btbd8         | Ccdc50    |
| Arhgap18  | Atg2b   | Baz2a         | C030005K06Rik | Ccdc57    |
| Arhgap21  | Atl3    | Bbs1          | C030046E11Rik | Ccdc6     |
| Arhgap26  | Atn1    | Bbx           | C030048H21Rik | Ccdc85c   |
| Arhgap32  | Atp10a  | BC005764      | C130026L21Rik | Ccdc93    |
| Arhgap39  | Atp11a  | BC006779      | C1q1l         | Cckbr     |
| Arhgef10  | Atp13a2 | BC016423      | C230038L03Rik | Cd93      |
| Arhgef10l | Atp13a5 | BC018507      | C230081A13Rik | Cd99l2    |
| Arhgef12  | Atp1a3  | BC020535      | C2cd3         | Cdc23     |
| Arhgef17  | Atp2b2  | BC024386      | C330013J21Rik | Cdc42bpb  |
| Arhgef18  | Atp2b3  | BC025920      | C4b           | Cdc7      |

|          |          |               |         |               |
|----------|----------|---------------|---------|---------------|
| Cdk13    | Cntnap3  | Cyb5d1        | Ddx17   | Dock1         |
| Cdk5rap2 | Cntnap5b | Cyp2u1        | Ddx3y   | Dock3         |
| Cdon     | Cntrob   | Cyp4f13       | Ddx51   | Dock4         |
| Cdyl2    | Cobl     | D10Bwg1379e   | Dennd1a | Dock6         |
| Cep164   | Cog1     | D11Wsu47e     | Dennd1b | Dock9         |
| Cep250   | Cog5     | D130020L05Rik | Dennd3  | Dok6          |
| Cep68    | Col16a1  | D130043K22Rik | Dennd5b | Dolk          |
| Cfh      | Col20a1  | D16Ert472e    | Dgkb    | Dopey2        |
| Cgnl1    | Copa     | D430019H16Rik | Dgkh    | Dot1l         |
| Chd3     | Copg     | D430036J16Rik | Dgki    | Dpp9          |
| Chd5     | Copg2    | D430041D05Rik | Dgkq    | Dpy19l3       |
| Chd6     | Coro6    | D5Ert4605e    | Dhx33   | Drosha        |
| Chml     | Cpeb2    | D630044L22Rik | Dhx8    | Drp2          |
| Chn2     | Cpeb4    | D630045J12Rik | Dicer1  | Dscaml1       |
| Chpt1    | Cpne2    | D830031N03Rik | Dido1   | Dst           |
| Chrd     | Cramp1l  | D830050J10Rik | Dip2a   | Dstyk         |
| Chst11   | Crebzf   | D930007J09Rik | Dip2b   | Dus3l         |
| Cic      | Creg2    | D930048N14Rik | Dip2c   | Dusp23        |
| Cit      | Crim1    | Daam2         | Dlg2    | Dusp3         |
| Clasp1   | Crk      | Dab2          | Dlg5    | Dusp4         |
| Clcn6    | Crtc1    | Dag1          | Dlgap2  | Dvl1          |
| Clcn7    | Csmd1    | Dagla         | Dll1    | Dync1h1       |
| Cldn12   | Csmd2    | Dcaf10        | Dlx6os1 | Dyrk1b        |
| Clec16a  | Csnk1g1  | Dcaf17        | Dmpk    | Dyrk2         |
| Clip3    | Csrnp3   | Dcaf7         | Dnahc1  | Dzip1         |
| Cmtm4    | Ctnnb1   | Dcbld2        | Dnajc1  | E030019B06Rik |
| Cnksr2   | Cttnbp2  | Dchs1         | Dnajc13 | E130003G02Rik |
| Cnn2     | Ctu2     | Dclk2         | Dnajc16 | E130116L18Rik |
| Cnnm2    | Cul9     | Dclre1b       | Dnase1  | E130308A19Rik |
| Cnot1    | Cux2     | Dcp2          | Dnm2    | E130317F20Rik |
| Cntn2    | Cxadr    | Dcun1d2       | Dnmt1   | E330009J07Rik |
| Cntnap1  | Cxcl12   | Ddi2          | Dnmt3a  | E330020D12Rik |

|               |               |        |               |         |
|---------------|---------------|--------|---------------|---------|
| E430024P14Rik | Eps8l2        | Farp1  | Fryl          | Gm10493 |
| Ebf4          | Erc1          | Fat1   | Fstl4         | Gm10524 |
| Ece2          | Esyt2         | Fbf1   | Fut11         | Gm10532 |
| Eda           | Etv3          | Fbxl18 | Fyco1         | Gm10561 |
| Edc4          | Evi5          | Fbxl20 | G630016G05Rik | Gm10593 |
| Edn3          | Exoc5         | Fbxo10 | G630030J09Rik | Gm10642 |
| Eef2          | Eya1          | Fbxo18 | G6pdx         | Gm10644 |
| Efnb2         | F630040L22Rik | Fbxo21 | Gab1          | Gm10658 |
| Efr3b         | Fa2h          | Fbxo27 | Gabbr2        | Gm10676 |
| Ehbp1         | Fads6         | Fbxo41 | Gabpb2        | Gm10785 |
| Ehd2          | Fam108c       | Fbxw17 | Gabrg3        | Gm10863 |
| Eif2c1        | Fam113a       | Fchsd2 | Gad2          | Gm11131 |
| Eif2c2        | Fam115a       | Fgf13  | Galnt2        | Gm11459 |
| Eif2c4        | Fam120a       | Fhdc1  | Gan           | Gm11508 |
| Eif4ebp2      | Fam120c       | Ficd   | Gas7          | Gm11611 |
| Elf2          | Fam129b       | Fkbp15 | Gata2         | Gm11696 |
| Elfn1         | Fam135b       | Flna   | Gatad2b       | Gm11766 |
| Elfn2         | Fam13b        | Flnb   | Gemin5        | Gm11769 |
| Elk1          | Fam160a2      | Flrt1  | Gfod1         | Gm11899 |
| Elk4          | Fam168a       | Flt1   | Gfpt1         | Gm11940 |
| Elmo2         | Fam168b       | Fmn2   | Ggcx          | Gm11973 |
| Eml6          | Fam173b       | Fmnl3  | Ghrl          | Gm12063 |
| Eng           | Fam176b       | Fmod   | Gipc2         | Gm12236 |
| Ep400         | Fam188b       | Foxf2  | Git1          | Gm12256 |
| Epb4.1        | Fam193b       | Foxk1  | Glis2         | Gm12395 |
| Epb4.1l1      | Fam196b       | Foxq1  | Glis3         | Gm12480 |
| Epb4.1l4b     | Fam198a       | Fras1  | Glt8d2        | Gm12523 |
| Epha10        | Fam20b        | Frmd4b | Gltscr1       | Gm12868 |
| Epha4         | Fam53b        | Frmd5  | Gm10065       | Gm12915 |
| Epha6         | Fam59a        | Frmpd3 | Gm10176       | Gm12945 |
| Ephx2         | Fam65b        | Frmpd4 | Gm10308       | Gm13112 |
| Eps8l1        | Fam78b        | Fry    | Gm1043        | Gm13179 |

|         |         |         |         |           |
|---------|---------|---------|---------|-----------|
| Gm13327 | Gm15525 | Gm16705 | Gpr161  | Heatr7a   |
| Gm13390 | Gm15535 | Gm16750 | Gpr173  | Hectd1    |
| Gm13562 | Gm15548 | Gm16762 | Gpr25   | Heg1      |
| Gm13563 | Gm15585 | Gm16896 | Gpr26   | Helz      |
| Gm13632 | Gm15587 | Gm16978 | Gpr50   | Herc1     |
| Gm13703 | Gm15598 | Gm17077 | Gpr63   | Hhat      |
| Gm13856 | Gm15609 | Gm2007  | Gprin2  | Hhip1     |
| Gm13872 | Gm15635 | Gm3764  | Gprin3  | Hic2      |
| Gm13883 | Gm15676 | Gm3892  | Gria1   | Hipk1     |
| Gm13999 | Gm1568  | Gm4793  | Grid1   | Hipk2     |
| Gm14174 | Gm15800 | Gm505   | Grid2   | Hist1h2bb |
| Gm14259 | Gm15813 | Gm5113  | Grik3   | Hist1h4j  |
| Gm14290 | Gm15849 | Gm514   | Grin1   | Hivep2    |
| Gm14322 | Gm15886 | Gm5567  | Grin2a  | Hivep3    |
| Gm14329 | Gm16008 | Gm5607  | Grin2b  | Hmbox1    |
| Gm14393 | Gm16023 | Gm5897  | Grm3    | Hmg20a    |
| Gm14409 | Gm16075 | Gm5901  | Grm7    | Hn1l      |
| Gm14419 | Gm16124 | Gm608   | Gsk3b   | Hnrnpu    |
| Gm14471 | Gm16159 | Gm6710  | Gtf3c1  | Hnrnpul1  |
| Gm14798 | Gm16214 | Gm694   | Gtpbp2  | Hs6st2    |
| Gm14820 | Gm16224 | Gm7854  | H2-DMb1 | Hs6st3    |
| Gm15246 | Gm16229 | Gm962   | H2-Eb1  | Hspa12a   |
| Gm15247 | Gm16240 | Gm9725  | H2-T10  | Hspg2     |
| Gm15288 | Gm16257 | Gm9766  | H6pd    | Htr1b     |
| Gm15295 | Gm16309 | Gm9783  | Hace1   | Htr2c     |
| Gm15298 | Gm16350 | Gm9925  | Haus6   | Htr5a     |
| Gm15317 | Gm16499 | Gm996   | Hdac4   | Htt       |
| Gm15347 | Gm16541 | Golga3  | Hdac9   | Huwe1     |
| Gm15350 | Gm16549 | Gpr101  | Hdlbp   | Iars      |
| Gm15415 | Gm16564 | Gpr116  | Heatr1  | Ift140    |
| Gm15477 | Gm16568 | Gpr123  | Heatr5a | Igdcc4    |
| Gm15518 | Gm16638 | Gpr125  | Heatr5b | Igf1r     |

|         |          |         |         |          |
|---------|----------|---------|---------|----------|
| Igf2bp3 | Irgq     | Kcnq5   | L1cam   | Lrp6     |
| Igf2r   | Irs2     | Kcns3   | L3mbtl1 | Lrp8     |
| Igfbp7  | Itgav    | Kcnt2   | Lag3    | Lrrc16b  |
| Ighmbp2 | Itpkb    | Kctd12  | Lama5   | Ltbp3    |
| Iglon5  | Itpr2    | Kdm1b   | Lamb2   | Ltbp4    |
| Igsf8   | Itpr3    | Kdm5d   | Lamc1   | Lypd6    |
| Igsf9b  | Itpripl2 | Kdr     | Lamc3   | Lyst     |
| Ikbkb   | Itn1     | Kif13b  | Lancl3  | Lztl1    |
| Il10ra  | Itn2     | Kif16b  | Lass2   | Lzts1    |
| Il18bp  | Jag1     | Kif19a  | Lass4   | Madd     |
| Il1rap1 | Jag2     | Kif1a   | Lca5    | Mafb     |
| Ino80c  | Jakmip3  | Kif21b  | Ldoc1l  | Magi1    |
| Ino80d  | Jmjd5    | Kif26a  | Leng8   | Magi2    |
| Inpp4a  | Jmy      | Kif26b  | Lgi2    | Magi3    |
| Inpp4b  | Jph1     | Kif27   | Lhfpl2  | Maml3    |
| Inpp5d  | Kalrn    | Kifc2   | Lhfpl3  | Man1a    |
| Inpp5e  | Kank1    | Kirrel3 | Lig3    | Man2a1   |
| Inpp5j  | Kbtbd11  | Klc2    | Lin7a   | Man2a2   |
| Insr    | Kbtbd4   | Klf12   | Lingo1  | Map3k10  |
| Ints1   | Kbtbd7   | Klf4    | Lingo2  | Map3k4   |
| Ints2   | Kcna1    | Klhdc5  | Lmbrd2  | Mapk4    |
| Ints7   | Kcnb1    | Klhl11  | Lmf1    | Mapk8ip2 |
| Invs    | Kcnb2    | Klhl15  | Lmtk2   | Mapk8ip3 |
| Ip6k1   | Kcnc1    | Klhl17  | Lmtk3   | Mapkbp1  |
| Ipmk    | Kcnd2    | Klhl26  | Lphn1   | March4   |
| Ipo9    | Kcnd3    | Klhl28  | Lphn3   | Mast2    |
| Iqgap1  | Kcng2    | Klhl29  | Lrba    | Mbd1     |
| Iqsec1  | Kcng3    | Klhl3   | Lrch4   | Mcm3ap   |
| Iqsec2  | Kcnh5    | Klhl34  | Lrfn3   | Mdc1     |
| Iqsec3  | Kcnn3    | Kndc1   | Lrp1    | Mdga1    |
| Irak1   | Kcnq2    | Ksr1    | Lrp3    | Mdm4     |
| Irgm2   | Kcnq3    | Ksr2    | Lrp4    | Mdn1     |

|           |         |         |        |          |
|-----------|---------|---------|--------|----------|
| Mecp2     | Mir434  | Mtmr3   | Ndst1  | Nppc     |
| Med12     | Mir540  | Mtmr9   | Nedd9  | Npr1     |
| Med13l    | Mir690  | Mtr     | Neo1   | Npr2     |
| Med15     | Mir7-1  | Mtss1l  | Neto1  | Nr3c2    |
| Med23     | Mir709  | Mybbp1a | Nf2    | Nrf1     |
| Med25     | Mir715  | Myh10   | Nfam1  | Nrg1     |
| Mef2a     | Mir770  | Myh9    | Nfasc  | Nrg3     |
| Mef2d     | Mir874  | Myl9    | Nfat5  | Nsd1     |
| Megf10    | Mkl2    | Myo10   | Nfatc3 | Ntng2    |
| Meig1     | Mll1    | Myo18a  | Nfx1   | Ntrk3    |
| Mela      | Mll2    | Myo1c   | Nhsl1  | Numa1    |
| Mettl13   | Mll3    | Myo9b   | Nhsl2  | Nup205   |
| Mex3b     | Mll5    | Myrip   | Nid1   | Nup210   |
| Mfap3l    | Mllt1   | Myst3   | Nipal3 | Nup214   |
| Mfhas1    | Mllt6   | Myst4   | Nipal4 | Obfc1    |
| Mfsd10    | Mme     | Myt1    | Nipbl  | Obsl1    |
| Mgat5     | Mmp15   | N28178  | Nisch  | Odf2     |
| Miat      | Mon1b   | Naa25   | Nkain3 | Odz3     |
| Mical1    | Mon2    | Naa30   | Nlgn2  | Odz4     |
| Micall1   | Morn1   | Nacad   | Nlgn3  | Ogdhl    |
| Mink1     | Mpeg1   | Narg2   | Noc4l  | Olfir692 |
| Mir1188   | Mre11a  | Nav1    | Nod1   | Opn3     |
| Mir137    | Msh3    | Nbas    | Nol4   | Orai2    |
| Mir1896   | Msh6    | Nbea    | Nomo1  | Osbpl5   |
| Mir1903   | Msn     | Nbeal2  | Nos1ap | Otof     |
| Mir1966   | Mta3    | Ncan    | Nos3   | Otud3    |
| Mir199a-1 | Mtap1a  | Ncoa1   | Notch1 | Otud4    |
| Mir3065   | Mtap1s  | Ncoa2   | Notch2 | Otud7b   |
| Mir3102   | Mtap6   | Ncoa3   | Notch3 | Pabpc5   |
| Mir337    | Mtap7   | Ncoa6   | Notch4 | Pacs1    |
| Mir338    | Mtap7d1 | Ncor1   | Npas1  | Padi2    |
| Mir421    | Mtmr2   | Ndor1   | Nphp3  | Pak6     |



|         |         |          |           |         |
|---------|---------|----------|-----------|---------|
| Palm2   | Pik3c2b | Pnpla3   | Prrc2a    | Rassf10 |
| Pank3   | Pik3cg  | Poc5     | Prrc2b    | Rassf4  |
| Papln   | Pikfyve | Podxl    | Prrc2c    | Rbak    |
| Paqr5   | Pip5k1c | Pofut1   | Prrt4     | Rbm10   |
| Paqr9   | Pitpnm1 | Pogk     | Ptchd1    | Rbm12   |
| Pard3   | Pitpnm2 | Pogz     | Ptger1    | Rbm26   |
| Parp4   | Pkd1    | Polr1a   | Ptgfrn    | Rbm33   |
| Parp8   | Plagl1  | Pot1a    | Ptpn14    | Rbm4    |
| Pcnt    | Plcb1   | Ppan     | Ptprb     | Rcan3   |
| Pcnx    | Plce1   | Ppap2b   | Ptprj     | Rcsd1   |
| Pcnxl2  | Plec    | Ppard    | Ptprn2    | Recql5  |
| Pcsk4   | Plekha1 | Ppargc1b | Ptpro     | Reep3   |
| Pde4a   | Plekha6 | Ppfia1   | Ptprs     | Rell1   |
| Pde4dip | Plekha7 | Ppfia2   | Ptprt     | Reps2   |
| Pde7b   | Plekhg1 | Ppip5k1  | Pxdn      | Ret     |
| Pde8a   | Plekhg3 | Ppip5k2  | Qser1     | Rexo1   |
| Pds5a   | Plekhh1 | Ppm1f    | R3hdm1    | Rfx1    |
| Pds5b   | Plekhh2 | Ppm1l    | Rab11fip3 | Rfx3    |
| Pdxk    | Plekhm3 | Ppp1r12b | Rab11fip4 | Rfx7    |
| Pdzd2   | Plekhn1 | Ppp1r16b | Rab30     | Rgag1   |
| Pecam1  | Plod1   | Ppp1r9a  | Rab43     | Rgp1    |
| Peli3   | Plxna1  | Ppp2r1b  | Rab711    | Rhobtb1 |
| Pex1    | Plxna2  | Ppp2r2c  | Rad54l2   | Rimbp3  |
| Pex12   | Plxna3  | Prdm5    | Rai1      | Rnf111  |
| Phc1    | Plxna4  | Prex1    | Ralgapa2  | Rnf121  |
| Phc3    | Plxnb1  | Prickle1 | Ralgds    | Rnf123  |
| Phf15   | Plxnb2  | Prickle2 | Ranbp10   | Rnf141  |
| Phf2    | Plxnb3  | Prkg1    | Rap1gap2  | Rnf144a |
| Pi4ka   | Plxnc1  | Prkrir   | Rapgef2   | Rnf157  |
| Pigg    | Pnma2   | Prom1    | Rapgef5   | Rnf207  |
| Pign    | Pnmal1  | Prpf8    | Rasa3     | Rnf213  |
| Pigq    | Pnmal2  | Prr12    | Rasal1    | Rnf38   |

|          |          |          |          |          |
|----------|----------|----------|----------|----------|
| Rnf44    | Sdk2     | Shank3   | Slc35e1  | Snord64  |
| Rnft2    | Sdpr     | Shc3     | Slc36a1  | Snord7   |
| Robo1    | Sec14l5  | She      | Slc38a1  | Snrnp200 |
| Robo4    | Sec16a   | Shisa7   | Slc38a5  | Sntb1    |
| Rpe      | Sec24b   | Siah3    | Slc39a14 | Snx12    |
| Rpgrip1l | Sema3c   | Sidt2    | Slc44a5  | Snx27    |
| Rps6kc1  | Sema3f   | Sik2     | Slc4a11  | Snx29    |
| Rptor    | Sema3g   | Sik3     | Slc4a8   | Snx30    |
| Rpusd3   | Sema6a   | Sike1    | Slc6a1   | Solh     |
| Rreb1    | Sema6c   | Sipa1l2  | Slc6a17  | Son      |
| Rsb1     | Sema7a   | Sipa1l3  | Slc6a6   | Sorcs1   |
| Rsc1a1   | Senp1    | Sirt6    | Slc7a14  | Sorcs2   |
| Rtel1    | Senp7    | Six3os1  | Slc7a5   | Sorcs3   |
| Rundc2a  | Sept8    | Skp2     | Slc9a1   | Sorl1    |
| Rusc1    | Serinc5  | Slain1   | Slc9a5   | Sort1    |
| Rusc2    | Setbp1   | Slc11a2  | Slco1c1  | Sp140    |
| Saal1    | Setd1a   | Slc12a5  | Slco2b1  | Sp2      |
| Samd5    | Setd1b   | Slc12a6  | Sln5     | Spata13  |
| Samhd1   | Setdb1   | Slc16a14 | Slitrk3  | Specc1   |
| Sap30l   | Sfmbt2   | Slc16a2  | Slitrk4  | Spen     |
| Sash1    | Sfrp1    | Slc16a7  | Smad3    | Spna2    |
| Sbf1     | Sfswap   | Slc1a1   | Smad4    | Spnb1    |
| Sbk1     | Sft2d2   | Slc1a2   | Smarca1  | Spnb2    |
| Scaf1    | Sgip1    | Slc22a23 | Smarcc1  | Spock2   |
| Scap     | Sgms1    | Slc22a5  | Smcr8    | Spon1    |
| Scfd2    | Sgsm1    | Slc22a8  | Smek1    | Spred2   |
| Scn3a    | Sgsm2    | Slc24a2  | Smg6     | Spred3   |
| Scn8a    | Sgtb     | Slc29a3  | Smg7     | Spsb4    |
| Scrt1    | Sh3bp4   | Slc2a1   | Smyd3    | Srbd1    |
| Scyl3    | Sh3pxd2a | Slc2a13  | Sned1    | Srcap    |
| Sdc2     | Shank1   | Slc2a8   | Snora28  | Srcin1   |
| Sdc3     | Shank2   | Slc35b4  | Snord45b | Srebf1   |

|            |          |           |          |        |
|------------|----------|-----------|----------|--------|
| Srf        | Sympk    | Tie1      | Tns1     | Tyk2   |
| Srgap1     | Syn3     | Tle1      | Tom1l2   | Uaca   |
| Srgap3     | Syne1    | Tle2      | Tpcn2    | Uap2   |
| Srpk3      | Syngap1  | Tln1      | Traf3ip2 | Uap2l  |
| Srr        | Synj1    | Tln2      | Trappc10 | Ubd    |
| Srrm1      | Szt2     | Tmcc2     | Trerf1   | Ube2o  |
| Srrm2      | Tacc1    | Tmco4     | Tril     | Ube4a  |
| Srrm4      | Tanc1    | Tmco7     | Trim25   | Ubr2   |
| Ssfa2      | Tanc2    | Tmem108   | Trim56   | Ubr4   |
| Ssh3       | Tbc1d16  | Tmem131   | Trim65   | Uck2   |
| St3gal2    | Tbc1d2b  | Tmem132b  | Trim7    | Uevld  |
| St5        | Tbc1d9   | Tmem135   | Trio     | Uggt1  |
| St6galnac2 | Tbck     | Tmem164   | Trip11   | Ugt8a  |
| St6galnac3 | Tbl1x    | Tmem181a  | Tro      | Ulk2   |
| St8sia2    | Tcf20    | Tmem2     | Trpc1    | Unc13a |
| Stard8     | Tcf15    | Tmem200a  | Trpc3    | Unc13b |
| Stard9     | Tead1    | Tmem201   | Trrap    | Unc5a  |
| Stim1      | Tecpr2   | Tmem210   | Tsc1     | Unc5b  |
| Stk11ip    | Tenc1    | Tmem74    | Tsc2     | Unc79  |
| Ston1      | Tep1     | Tmtc2     | Tspan18  | Upf1   |
| Ston2      | Tert     | Tnfrsf11a | Ttbk1    | Urb1   |
| Strn       | Tet1     | Tnfrsf18  | Ttc28    | Ushbp1 |
| Strn4      | Tet3     | Tnfrsf1a  | Ttc34    | Usp22  |
| Stx1b      | Tgfbrap1 | Tnfrsf21  | Ttc7b    | Usp37  |
| Stxbp4     | Thada    | Tnfsf12   | Ttc8     | Usp49  |
| Stxbp5     | Thbs3    | Tnik      | Ttc9c    | Utp14b |
| Sugp2      | Thrb     | Tnip2     | Tti1     | Utrn   |
| Sun1       | Thsd1    | Tnks1bp1  | Tub      | Uxt    |
| Susd1      | Thsd7a   | Tnr       | Tubgcp4  | Vasn   |
| Suv420h1   | Thtpa    | Tnrc18    | Tulp4    | Vprbp  |
| Sv2c       | Tia1     | Tnrc6b    | Twsg1    | Vps13c |
| Swap70     | Tiam1    | Tnrc6c    | Txlna    | Vps13d |

|        |         |         |         |          |
|--------|---------|---------|---------|----------|
| Vps18  | Wnk2    | Zdhhc8  | Zfp3612 | Zfp74    |
| Vps33a | Xdh     | Zdhhc9  | Zfp382  | Zfp786   |
| Vps39  | Xkr6    | Zeb1    | Zfp384  | Zfp804a  |
| Vti1a  | Xkr7    | Zeb2    | Zfp39   | Zfp827   |
| Vwa5b2 | Xlr3b   | Zer1    | Zfp398  | Zfp846   |
| Vwc2   | Xpo6    | Zfc3h1  | Zfp407  | Zfp865   |
| Wasf3  | Xpr1    | Zfhx2   | Zfp41   | Zfyve1   |
| Wasl   | Xrn1    | Zfhx2as | Zfp507  | Zfyve20  |
| Wbp7   | Xylt1   | Zfp106  | Zfp518b | Zgpat    |
| Wdfy3  | Ylpm1   | Zfp109  | Zfp532  | Zhx3     |
| Wdr11  | Yod1    | Zfp12   | Zfp551  | Zkscan16 |
| Wdr13  | Zbtb16  | Zfp174  | Zfp597  | Zmiz1    |
| Wdr19  | Zbtb4   | Zfp192  | Zfp609  | Zmynd12  |
| Wdr26  | Zbtb49  | Zfp238  | Zfp629  | Zmynd8   |
| Wdr52  | Zbtb7a  | Zfp295  | Zfp641  | Znf512b  |
| Wdr59  | Zc3h12c | Zfp316  | Zfp646  | Znfx1    |
| Wdr76  | Zc3h3   | Zfp335  | Zfp664  | Znrf3    |
| Wdr90  | Zc3h7b  | Zfp346  | Zfp697  | Zscan22  |
| Wfs1   | Zcchc14 | Zfp366  | Zfp704  | Zzef1    |
| Wnk1   | Zdhhc17 | Zfp369  | Zfp715  |          |



**Increase,  
Withdrawal  
only**

|               |               |               |          |          |
|---------------|---------------|---------------|----------|----------|
| 0610011L14Rik | 2310079F23Rik | 5031439G07Rik | Abcc8    | Ampd3    |
| 1110012J17Rik | 2410133F24Rik | 5330417C22Rik | Abcg1    | Amz1     |
| 1110018G07Rik | 2410137F16Rik | 5430405H02Rik | Abcg2    | Anapc10  |
| 1110021J02Rik | 2600006K01Rik | 5730494N06Rik | Abhd1    | Ankdd1a  |
| 1110028C15Rik | 2610028E06Rik | 5930403L14Rik | Abl2     | Ankk1    |
| 1300018J18Rik | 2610034B18Rik | 6330409D20Rik | Acpl2    | Ankle1   |
| 1500002O10Rik | 2700062C07Rik | 6330512M04Rik | Acta2    | Ankrd11  |
| 1700001K19Rik | 2810030E01Rik | 6330545A04Rik | Actr5    | Ankrd24  |
| 1700012A16Rik | 2810442N19Rik | 6430550D23Rik | Adam15   | Ankrd34c |
| 1700020A23Rik | 2900056M20Rik | 6530401N04Rik | Adam1b   | Ankrd39  |
| 1700021J08Rik | 2900072N19Rik | 9030624J02Rik | Adamts1  | Ankrd56  |
| 1700021K19Rik | 3010001F23Rik | 9330160F10Rik | Adamts2  | Ankrd61  |
| 1700028N14Rik | 3110079O15Rik | 9430008C03Rik | Adamts20 | Anks3    |
| 1700047K16Rik | 4632415L05Rik | 9430015G10Rik | Adamts3  | Ano6     |
| 1700047M11Rik | 4632428N05Rik | 9430021M05Rik | Adamtsl1 | Ano8     |
| 1700051A21Rik | 4732471J01Rik | 9430091E24Rik | Adamtsl4 | Aoc2     |
| 1700064E03Rik | 4833442J19Rik | 9530052E02Rik | Adamtsl5 | Ap1m1    |
| 1700069B07Rik | 4921518J05Rik | 9630001P10Rik | Adap2    | Ap2a1    |
| 1700086L19Rik | 4930432K21Rik | A330040F15Rik | Adat2    | Apaf1    |
| 1700095B22Rik | 4930442H23Rik | A430046D13Rik | Afap1    | Aqp9     |
| 1700112M01Rik | 4930507D05Rik | A430105I19Rik | Afap1l2  | Arap1    |
| 1700113I22Rik | 4930579C15Rik | A730011L01Rik | Aga      | Arhgap1  |
| 1700121F15Rik | 4930581F22Rik | A830007P12Rik | Agpat3   | Arhgap17 |
| 1700125H03Rik | 4931440F15Rik | A830012C17Rik | Agrp     | Arhgap22 |
| 2310002J15Rik | 4933417D19Rik | A830093I24Rik | Al428936 | Arhgap23 |
| 2310042D19Rik | 4933424B01Rik | A930028C08Rik | Al646023 | Arhgap27 |
| 2310044G17Rik | 4933426M11Rik | AA986860      | Ajap1    | Arhgap29 |
| 2310058D17Rik | 4933427D14Rik | Abca7         | Ak5      | Arhgap33 |
| 2310061J03Rik | 4933432B09Rik | Abcb9         | Akap8l   | Arhgef1  |
| 2310067B10Rik | 4933439C10Rik | Abcc1         | Alg12    | Arhgef40 |
|               | 5031425E22Rik | Abcc10        | Als2cl   | Arhgef7  |
|               | 5031434O11Rik | Abcc4         | Amigo1   | Arid1b   |

|               |               |               |          |            |
|---------------|---------------|---------------|----------|------------|
| Arid3b        | B3gat1        | C030014I23Rik | Ccnt1    | Clstn1     |
| Armcx2        | B430305J03Rik | C030023E24Rik | Cd248    | Cml5       |
| Arnt          | B430319F04Rik | C130036L24Rik | Cd274    | Cnm3       |
| Arv1          | B4galnt4      | C1galt1       | Cd2ap    | Cnst       |
| Arx           | Bag6          | C230057M02Rik | Cd33     | Cntfr      |
| Asb6          | Bahd1         | C2cd4b        | Cd34     | Cntnap5c   |
| Ascc2         | Bai1          | C530025M09Rik | Cd84     | Cobll1     |
| Asprv1        | BC007180      | Cables2       | Cd97     | Cog2       |
| Astn2         | BC017158      | Cacna1h       | Cdc25b   | Col11a1    |
| Atcay         | BC018242      | Cacna1i       | Cdc42bpg | Col1a2     |
| Atf6b         | BC023829      | Cacng8        | Cdk12    | Col27a1    |
| Atg16l2       | BC024978      | Cad           | Cdk17    | Col2a1     |
| Atg2a         | BC026600      | Caln1         | Cdk8     | Col4a1     |
| Atg4b         | BC030499      | Camk2a        | Cebpb    | Col4a2     |
| Atp11c        | BC034090      | Cant1         | Celf3    | Col6a1     |
| Atp13a1       | BC060267      | Capn1         | Celf5    | Col6a2     |
| Atp2a3        | BC068157      | Car12         | Genpt    | Coro1c     |
| Atp6v1c2      | Bche          | Car4          | Cep110   | Coro2b     |
| Atxn2l        | Bcl11a        | Card10        | Cercam   | Coro7      |
| AU021092      | Bcl11b        | Caskin2       | Cfb      | Cpne4      |
| AU022252      | Bcr           | Casp6         | Chd2     | Cpsf4      |
| AU040320      | Bend3         | Casz1         | Chd8     | Crem       |
| Auts2         | Bglap-rs1     | Cbfa2t3       | Cherp    | Crocc      |
| AW549877      | Bhlhb9        | Cc2d1b        | Chfr     | Cry2       |
| AW554918      | Bmf           | Ccdc108       | Chrm1    | Crybg3     |
| AY036118      | Bmp1          | Ccdc120       | Chst15   | Csad       |
| Azi1          | Bmp4          | Ccdc163       | Ciz1     | Csf1r      |
| B130046B21Rik | Brf1          | Ccdc81        | Clcn1    | Csf2ra     |
| B130055M24Rik | Brpf3         | Ccdc84        | Cldn5    | Csgalnact1 |
| B230120H23Rik | Bst2          | Ccdc88b       | Clec11a  | Csk        |
| B230208H17Rik | Btbd17        | Ccdc88c       | Clec14a  | Csnk1d     |
| B230314M03Rik | Bud13         | Ccdc97        | Cln5     | Ctnnal1    |

|               |               |               |         |         |
|---------------|---------------|---------------|---------|---------|
| Ctns          | Dgkd          | Eif2d         | Fam193a | Foxp2   |
| Cyp26b1       | Dhcr24        | Eif4enif1     | Fam196a | Frmd8   |
| Cyp4f16       | Dhx34         | Eil           | Fam38a  | Frmppd1 |
| Cyth3         | Dhx35         | Eme2          | Fam40b  | Fuk     |
| D030047H15Rik | Dhx37         | Emr1          | Fam49a  | Furin   |
| D330050G23Rik | Diap1         | Enpp6         | Fam53a  | Fxyd4   |
| D3Bwg0562e    | Disc1         | Entpd5        | Fam53c  | Fzr1    |
| D430020J02Rik | Dlg4          | Epc1          | Fam73b  | Gab2    |
| D630041G03Rik | Dlgap3        | Epha8         | Fam89a  | Gal3st1 |
| D930015M05Rik | Dlgap4        | Ephb3         | Fan1    | Galnt10 |
| Dapk1         | Dlk1          | Epn1          | Fancc   | Galnt14 |
| Dbil5         | Dlk2          | Epn2          | Fbln2   | Gapdhs  |
| Dbnidd1       | Dll4          | Eps15l1       | Fbrsl1  | Gbe1    |
| Dcaf12l2      | Dnahc17       | Eps8          | Fbxl16  | Gbx2    |
| Dcdc2b        | Dnase111      | Ercc8         | Fbxl21  | Gcn1l1  |
| Dcdc2c        | Dpagt1        | Esam          | Fbxl8   | Gem     |
| Dclk3         | Dpf3          | Etv4          | Fbxo32  | Gfra1   |
| Dclre1a       | Drd3          | Etv6          | Fbxo39  | Gga2    |
| Dcst1         | Dsel          | Evpl          | Fbxo45  | Gga3    |
| Ddr1          | Dusp16        | Exoc8         | Fcho1   | Ggta1   |
| Ddx21         | Dusp8         | Extl3         | Fdxacb1 | Gigyf1  |
| Ddx31         | E130304I02Rik | Eya2          | Fes     | Gigyf2  |
| Ddx41         | E4f1          | F630110N24Rik | Fgfrl1  | Git2    |
| Def8          | Ece1          | Fam102b       | Fggy    | Gjd3    |
| Defb7         | Ecm1          | Fam116b       | Filip1  | Gle1    |
| Dennd4b       | Edem1         | Fam123b       | Flad1   | Gltd1   |
| Depdc5        | Eea1          | Fam125b       | Fli1    | Gm10010 |
| Dera          | Eftud2        | Fam149b       | Flt3l   | Gm10083 |
| Det1          | Egr3          | Fam160b1      | Fnbp4   | Gm10135 |
| Dffb          | Ehd1          | Fam163a       | Fosl2   | Gm10174 |
| Dgat1         | Ehmt2         | Fam171a2      | Foxk2   | Gm10190 |
| Dgcr14        | Eif2ak3       | Fam176a       | Foxn3   | Gm10421 |



|         |         |         |         |           |
|---------|---------|---------|---------|-----------|
| Gm10518 | Gm14573 | Gm16256 | Golgb1  | Helq      |
| Gm10584 | Gm14862 | Gm16323 | Gon4l   | Herpud2   |
| Gm10638 | Gm15156 | Gm16349 | Gopc    | Hif1an    |
| Gm10818 | Gm15200 | Gm16365 | Gp1ba   | Hip1r     |
| Gm10973 | Gm15287 | Gm16485 | Gpatch8 | Hipk4     |
| Gm11201 | Gm15328 | Gm16552 | Gpc1    | Hist1h1e  |
| Gm11646 | Gm15337 | Gm16617 | Gpc6    | Hist1h2ag |
| Gm11705 | Gm15552 | Gm16624 | Gpr124  | Hist1h2bh |
| Gm11767 | Gm15591 | Gm16684 | Gpr146  | Hist2h4   |
| Gm11788 | Gm15623 | Gm16793 | Gpr180  | Hmgxb3    |
| Gm11948 | Gm15624 | Gm16861 | Gpr30   | Hpcal4    |
| Gm12212 | Gm15645 | Gm16878 | Gpr52   | Hps1      |
| Gm12265 | Gm15658 | Gm2115  | Gpsm1   | Hps3      |
| Gm12668 | Gm15663 | Gm4409  | Gpsm2   | Hs1bp3    |
| Gm12709 | Gm15672 | Gm5465  | Gramd1a | Hs6st1    |
| Gm12840 | Gm15726 | Gm5577  | Grin2c  | Hsd17b7   |
| Gm13199 | Gm15775 | Gm6145  | Grm4    | Htr4      |
| Gm13308 | Gm15816 | Gm6288  | Gtf3c3  | Htr6      |
| Gm1337  | Gm15851 | Gm7008  | Gtf3c4  | Hyal1     |
| Gm13399 | Gm15857 | Gm7102  | Gtpbp1  | lbtck     |
| Gm13547 | Gm15883 | Gm8923  | Gucy1a3 | lck       |
| Gm13554 | Gm15893 | Gm9017  | Gxylt1  | ldua      |
| Gm13709 | Gm15917 | Gm9821  | Gzf1    | lfi27l2a  |
| Gm14136 | Gm15918 | Gm9945  | H2-Ab1  | lfitm3    |
| Gm14149 | Gm15996 | Gm9970  | H2-T24  | lft57     |
| Gm14198 | Gm16001 | Gmeb2   | Has3    | lft88     |
| Gm14204 | Gm1604b | Gmppa   | Hck     | lgsf3     |
| Gm14275 | Gm16050 | Gna12   | Hdac6   | lgsf9     |
| Gm14401 | Gm16105 | Gnal    | Hdac8   | ll17ra    |
| Gm14420 | Gm16108 | Gnaz    | Hdx     | ll6ra     |
| Gm14455 | Gm16119 | Gne     | Heatr6  | Ino80     |
| Gm14462 | Gm16172 | Golga2  | Heca    | Inpp5k    |

|         |         |         |           |           |
|---------|---------|---------|-----------|-----------|
| Insc    | Kctd8   | Leprel2 | Map3k3    | Mir138-1  |
| Insl3   | Kdm2a   | Lgals6  | Map4k2    | Mir138-2  |
| Insm1   | Kdm3a   | Lgr4    | Map4k4    | Mir186    |
| Ints10  | Kdm4b   | Lhx6    | Map6d1    | Mir1893   |
| Ints4   | Kdm5b   | Limch1  | Mapk8ip1  | Mir1900   |
| lqgap2  | Kdm5c   | Lime1   | March8    | Mir1901   |
| Irf2    | Kdm6b   | Lims1   | Mark1     | Mir1905   |
| Irgm1   | Khsrp   | Lingo3  | Marveld1  | Mir1906-1 |
| Islr    | Kif13a  | Lins    | Masp1     | Mir1969   |
| Isoc1   | Kif17   | Llgl1   | Masp2     | Mir1970   |
| Itga5   | Kif7    | Lmbr1l  | Mast3     | Mir212    |
| Itga9   | Kif9    | Lmf2    | Matn2     | Mir2139   |
| Itgam   | Kirrel  | Lmo7    | Mau2      | Mir219-1  |
| Itgb4   | Klf2    | Lnx2    | Mbd4      | Mir219-2  |
| Itpr1   | Klf7    | Lrfrn2  | Mbd6      | Mir2861   |
| Jakmip1 | Klhdc10 | Lrig3   | Mboat1    | Mir3062   |
| Jph3    | Klhdc7a | Lrrc3   | Mbtps1    | Mir3070b  |
| Jph4    | Klhl14  | Lrrc45  | Mcam      | Mir3072   |
| Jup     | Klhl18  | Lrrc55  | Med16     | Mir344-2  |
| Kank2   | Klhl2   | Lrtm2   | Meg3      | Mir344b   |
| Kank3   | Klhl20  | Lsr     | Megf8     | Mir344d-3 |
| Kank4   | Klhl22  | Lysmd3  | Mesdc1    | Mir344g   |
| Kbtbd3  | Klhl23  | Lzic    | Mex3d     | Mir376a   |
| Kcna3   | Klhl35  | Mafg    | Mfap2     | Mir453    |
| Kcnh1   | Klhl36  | Mag     | Mgat5b    | Mir485    |
| Kcnh2   | Krba1   | Maml2   | Mgrn1     | Mir493    |
| Kcnh6   | Kremen1 | Man1c1  | Mical3    | Mir568    |
| Kcnj2   | Lamb1   | Man2b1  | Mir124a-1 | Mir698    |
| Kcns1   | Lcmt2   | Mansc1  | Mir124a-2 | Mir700    |
| Kcns2   | Lcp2    | Map2k6  | Mir124a-3 | Mir718    |
| Kcnt1   | Lemd3   | Map2k7  | Mir128-2  | Mir761    |
| Kctd11  | Lepre1  | Map3k11 | Mir134    | Mir9-1    |

|          |            |         |         |          |
|----------|------------|---------|---------|----------|
| Mirg     | Nav2       | Nupl1   | Pcolce  | Plaa     |
| Mirlet7e | Nbr1       | Oasl2   | Pdcd11  | Plat     |
| Mkl1     | Ncapd2     | Obfc2a  | Pde10a  | Plcg1    |
| Mknk2    | Nckap1l    | Ocel1   | Pde2a   | Plch2    |
| Mlf1ip   | Ncln       | Odz2    | Pde4c   | Pld1     |
| Mllt10   | Ncoa5      | Olfm3   | Pde8b   | Plekha5  |
| Mllt4    | Ncrna00086 | Olfr239 | Pde9a   | Plekha2  |
| Mlxip1   | Ncstn      | Osbp    | Pdgfb   | Plin3    |
| Mmp28    | Ndst2      | Osbpl10 | Pdgfrb  | Plod3    |
| Mn1      | Neat1      | Osbpl11 | Pdzd7   | Pltp     |
| Mocs1    | Nedd4l     | Osbpl7  | Pdzrn3  | Plxnd1   |
| Mocs3    | Nes        | Osgin1  | Pear1   | Pms1     |
| Morc3    | Neur11a    | Oxsr1   | Pex6    | Pola2    |
| Mphosph9 | Neur12     | P2rx6   | Pgbd1   | Polr1b   |
| Mpp2     | Neur14     | P2ry14  | Pgm1    | Polr3f   |
| Mprip    | Nfatc2     | P2ry6   | Phactr4 | Polr3g   |
| Mr1      | Nfic       | Palm    | Phf16   | Pou3f4   |
| Mtmr1    | Nfrkb      | Palmd   | Phldb1  | Ppapdc1b |
| Mtmr12   | Nhlrc3     | Pan2    | Pias3   | Ppara    |
| Mtmr14   | Nkd1       | Pank1   | Pid1    | Ppifos   |
| Myh11    | Nol6       | Paox    | Pigk    | Ppih     |
| Mylk     | Notum      | Papd5   | Pik3cd  | Ppp1r13l |
| Mynn     | Nova2      | Paqr3   | Pik3r3  | Ppp2r5a  |
| Myo16    | Npas3      | Pard6g  | Pik3r4  | Ppp6r1   |
| Myo1d    | Nploc4     | Parp9   | Pip4k2b | Ppp6r3   |
| Myo3b    | Nradd      | Parvb   | Pkd2    | Pppde1   |
| Mzf1     | Nras       | Parvg   | Pkn1    | Pprc1    |
| n-R5-8s1 | Nsmaf      | Pask    | Pknox1  | Prcp     |
| N4bp1    | Nsun3      | Paxip1  | Pknox2  | Prdm10   |
| Naa40    | Ntn1       | Pbx1    | Pla2g3  | Prdm11   |
| Nat10    | Nup133     | Pcif1   | Pla2g4b | Prdm15   |
| Nat6     | Nup93      | Pcnxl3  | Pla2g5  | Prkch    |

|           |         |          |          |          |
|-----------|---------|----------|----------|----------|
| Prkdc     | Rasa2   | Sbno2    | Slc37a1  | Snord37  |
| Prosapip1 | Rasgrp2 | Scaf8    | Slc38a10 | Snord45c |
| Prox2     | Rbck1   | Scamp2   | Slc38a11 | Snord49a |
| Prpf18    | Rbm14   | Scrib    | Slc38a3  | Snord68  |
| Prr22     | Rbm19   | Scube3   | Slc38a9  | Snord83b |
| Prrt3     | Rbm27   | Sds      | Slc39a3  | Snord88a |
| Pskh1     | Rbms2   | Sec31a   | Slc40a1  | Snrk     |
| Psmg1     | Rccd1   | Sema4c   | Slc44a2  | Snx15    |
| Ptcd1     | Rcor1   | Sema5b   | Slc46a3  | Snx19    |
| Ptch2     | Reck    | Sepn1    | Slc4a2   | Snx25    |
| Ptchd2    | Rftn2   | Sepsecs  | Slc4a3   | Socs6    |
| Ptpn1     | Rfx4    | Serac1   | Slc5a7   | Sox17    |
| Ptpn13    | Rfx5    | Serpinb9 | Slc6a13  | Sox18    |
| Ptpn21    | Rgl2    | Serpinf1 | Slco5a1  | Sp9      |
| Ptpn23    | Rimbp2  | Sez6     | Smarca4  | Spata2   |
| Ptpn9     | Rimkla  | Sf3b3    | Smcr7    | Specc11  |
| Ptpre     | Rin1    | Sh2b3    | Smok4a   | Spice1   |
| Ptprm     | Rn4.5s  | Sh3bp2   | Smpd3    | Spnb3    |
| Ptprn     | Rnf150  | Sh3rf3   | Smpd4    | Spnb4    |
| Ptprv     | Rnf24   | Shc2     | Smpdl3b  | Sprn     |
| Pum1      | Rnf40   | Shisa9   | Smurf1   | Spry1    |
| Pus10     | Rnpepl1 | Shkbp1   | Snapc4   | Srsf12   |
| Pvr       | Rp2h    | Sipa111  | Sncaip   | Srsf6    |
| Pvt1      | Rtbdn   | Six5     | Snora16a | Ss18l1   |
| Pwp2      | Rwdd3   | Ski      | Snora30  | Sssca1   |
| Pycard    | Rwdd4a  | Skiv2l   | Snora61  | St3gal1  |
| Qrfpr     | Rxfp3   | Slc19a1  | Snora74a | St6gal1  |
| Rab36     | Ryr1    | Slc19a2  | Snora7a  | St6gal2  |
| Rapgef1   | S100a4  | Slc24a4  | Snora81  | Stab1    |
| Rapgef3   | Sap130  | Slc26a1  | Snord14c | Stat1    |
| Rapgef11  | Sap25   | Slc26a2  | Snord2   | Stat3    |
| Rara      | Sbf2    | Slc30a4  | Snord32a | Stat5a   |

|          |           |         |         |         |
|----------|-----------|---------|---------|---------|
| Stk10    | Tmem169   | Ttc15   | Vsig10l | Zfp167  |
| Stk17b   | Tmem184b  | Ttc30a2 | Vsig2   | Zfp169  |
| Stk35    | Tmem196   | Ttc32   | Vwa5a   | Zfp187  |
| Stk40    | Tmem204   | Ttc5    | Wdr24   | Zfp219  |
| Stra6    | Tmem214   | Ttc9    | Wdr4    | Zfp248  |
| Sulf2    | Tmem39b   | Ttll4   | Wdr41   | Zfp317  |
| Supt5h   | Tmem42    | Ttpal   | Wdr44   | Zfp319  |
| Supt6h   | Tmem44    | Tuba8   | Wdr78   | Zfp334  |
| Susd4    | Tmem86b   | Tubd1   | Whsc2   | Zfp361l |
| Svil     | Tmod3     | Tubgcp6 | Wiz     | Zfp446  |
| Syt6     | Tnfaip8l1 | Txndc11 | Wsb1    | Zfp503  |
| Syt7     | Tnfsf13   | Tysnd1  | Wscd1   | Zfp516  |
| Taf4a    | Tnk2      | Uba7    | Wscd2   | Zfp518a |
| Tatdn2   | Tnpo2     | Ubap1   | Wwc1    | Zfp523  |
| Tbc1d20  | Tox3      | Ube3b   | Wwc2    | Zfp526  |
| Tbc1d4   | Tpp2      | Ubp1    | Wwp2    | Zfp53   |
| Tbc1d8   | Trabd     | Uck1    | Wwtr1   | Zfp575  |
| Tcerg1l  | Traf7     | Ulk1    | Xpc     | Zfp592  |
| Tcf7     | Trafd1    | Ulk3    | Yaf2    | Zfp598  |
| Tctn1    | Trank1    | Urb2    | Yes1    | Zfp628  |
| Tctn3    | Trim3     | Urgcp   | Ypel2   | Zfp651  |
| Tdp1     | Trim35    | Usp19   | Ythdf3  | Zfp652  |
| Tead3    | Trim36    | Usp3    | Zbed4   | Zfp653  |
| Terf2ip  | Trim46    | Usp6nl  | Zbtb10  | Zfp668  |
| Tes      | Trim62    | Usp8    | Zbtb34  | Zfp710  |
| Tfdp2    | Trim9     | Vav2    | Zbtb43  | Zfp738  |
| Tgfa     | Trpc6     | Vax1    | Zcchc3  | Zfp763  |
| Thap1    | Trpm4     | Vcl     | Zdhhc22 | Zfp777  |
| Thbd     | Tsga10    | Vgll4   | Zdhhc23 | Zfp790  |
| Tle4     | Tshz1     | Vldlr   | Zfp111  | Zfp809  |
| Tm4sf5   | Tspan9    | Vps54   | Zfp112  | Zfp862  |
| Tmem150a | Ttc13     | Vrk1    | Zfp142  | Zfp867  |

Zfp951  
Zfr2  
Zfyve16

Zfyve19  
Zfyve26  
Zfyve28

Zkscan17  
Zkscan4  
Zmiz2

Zmym3  
Zscan30  
Zswim1

Zswim4  
Zswim5  
Zswim6



**More transient  
increase cocaine  
only**

|               |               |          |               |               |
|---------------|---------------|----------|---------------|---------------|
| 1110018J18Rik | 4930483K19Rik | Accs     | Appl2         | Bclaf1        |
| 1200011I18Rik | 4930539J05Rik | Acer2    | Aqr           | Bdp1          |
| 1500010J02Rik | 4930578G10Rik | Acer3    | Ar            | Bend4         |
| 1600012F09Rik | 4932443L11Rik | Acot6    | Arap3         | Bmpr1a        |
| 1700006P19Rik | 4933403G14Rik | Acp2     | Arhgap19      | Bmpr1b        |
| 1700019G17Rik | 4933407C03Rik | Acsbg1   | Arhgap24      | Bnip2         |
| 1700020D05Rik | 4933411K20Rik | Acvr1c   | Arl13b        | Btaf1         |
| 1700030C12Rik | 5330426P16Rik | Adal     | Arl4c         | Btbd11        |
| 1700030C14Rik | 6230400D17Rik | Adam10   | Arl5b         | C130040N14Rik |
| 1700080N15Rik | 6330418K02Rik | Adat1    | Arntl2        | C130071C03Rik |
| 1700084C01Rik | 6330503K22Rik | Add1     | Ate1          | C230004F18Rik |
| 1700087M22Rik | 6430590A07Rik | Agbl5    | Atg4a         | C230096C10Rik |
| 1700120B22Rik | 6430704M03Rik | Al429214 | Atp13a4       | C330006K01Rik |
| 1700120K04Rik | 6430706D22Rik | Al464131 | Atp9b         | C430048L16Rik |
| 1700125G02Rik | 6720456H20Rik | Akna     | Atrx          | C920011F04Rik |
| 2010106G01Rik | 9130011E15Rik | Alg13    | AV039307      | Cadps2        |
| 2010317E24Rik | 9130019P16Rik | Alg6     | B230209E15Rik | Calhm2        |
| 2210018M11Rik | 9330101J02Rik | Alox5ap  | B230216N24Rik | Camk2d        |
| 2210411M09Rik | 9430060I03Rik | Angpt1   | B230369F24Rik | Cand2         |
| 2310028H24Rik | 9530068E07Rik | Angptl4  | B3galt2       | Capns2        |
| 2310068J16Rik | A230057D06Rik | Ankrd10  | B4galt1       | Capza1        |
| 2310069G16Rik | A430033K04Rik | Ankrd13c | B930003M22Rik | Car15         |
| 2700007P21Rik | A430110L20Rik | Ankzf1   | Bag4          | Car8          |
| 2700078E11Rik | A4galt        | Anln     | Bbs12         | Cask          |
| 2900005J15Rik | A730011C13Rik | Ano4     | BC020402      | Cbfb          |
| 2900006K08Rik | A730081D07Rik | Anxa9    | BC035947      | Cbx5          |
| 2900026A02Rik | A930001N09Rik | Aox1     | BC048403      | Ccdc116       |
| 3110082D06Rik | A930035D04Rik | Ap3b1    | BC049715      | Ccdc164       |
| 4921531C22Rik | Aasdh         | Aph1b    | BC053749      | Ccdc39        |
| 4930478K11Rik | Abhd4         | Aph1c    | BC088983      | Ccdc66        |
|               | Abi2          | Apitd1   | BC089491      | Ccdc75        |
|               | Accn1         | App      | Bcar3         | Ccdc85a       |



|         |               |          |         |          |
|---------|---------------|----------|---------|----------|
| Ccdc96  | Creb3l1       | Dos      | Etv5    | Fgfr1op  |
| Ccnd1   | Creg1         | Dpyd     | Exoc2   | Fgfr1op2 |
| Ccnd3   | Crlf3         | Dpysl3   | Exoc3l  | Fhl1     |
| Ccnt2   | Crtc3         | Dscc1    | Exosc8  | Fign     |
| Ccny    | Csrp2         | Dscr3    | F11r    | Fiz1     |
| Ccrn4l  | Ctbp2         | Dsn1     | Fadd    | Fktn     |
| Cd164   | Ctrl          | Dusp11   | Fam111a | Flcn     |
| Cd164l2 | Cul3          | Dync2h1  | Fam126b | Flt3     |
| Cd27    | Cwf19l1       | Dynlt1a  | Fam135a | Fmnl2    |
| Cdc27   | Cxcr7         | Dzip3    | Fam149a | Fosl1    |
| Cdk19   | Cyhr1         | E2f3     | Fam161b | Foxd1    |
| Cdkl1   | Cyp2j12       | Ecel1    | Fam184a | Foxp4    |
| Cdr1    | D130040H23Rik | Ecm2     | Fam185a | Frmf3    |
| Celf6   | Dbr1          | Eftud1   | Fam199x | Fsd1l    |
| Cep120  | Dcdc2a        | Elac1    | Fam32a  | Fstl5    |
| Cep70   | Dclk1         | Elavl1   | Fam35a  | Fut9     |
| Cflar   | Dcn           | Elovl5   | Fam59b  | Fxyd5    |
| Chchd8  | Dctd          | Elovl7   | Fam71e1 | Gabpa    |
| Chm     | Dcun1d4       | Emid1    | Far1    | Gabra1   |
| Chst14  | Ddo           | Endod1   | Fbln5   | Gabra5   |
| Chuk    | Ddx3x         | Enox     | Fbxl14  | Gabre    |
| Ckap5   | Dear1         | Epb4.1l3 | Fbxl5   | Gal3st4  |
| Cldn11  | Dgkg          | Epb4.1l5 | Fbxo28  | Galnt4   |
| Clvs1   | Dhdh          | Epc2     | Fbxo30  | Galnt7   |
| Cnksr3  | Dhx57         | Erap1    | Fbxo33  | Gbp5     |
| Cno     | Dis3l2        | Erbb2ip  | Fem1b   | Gca      |
| Col6a4  | Dixdc1        | Erc2     | Fermt2  | Gcc1     |
| Copb2   | Dlgap1        | Eri2     | Fgd6    | Gdap1    |
| Cpne1   | Dmxl2         | Ermn     | Fgf1    | Gdpd2    |
| Cpne7   | Dnajc28       | Ero1l    | Fgf14   | Gfra2    |
| Cpsf6   | Dnhd1         | Esyt1    | Fgf20   | Ggn      |
| Cr1l    | Doc2a         | Etv1     | Fgf22   | Gjb2     |

|         |         |         |           |         |
|---------|---------|---------|-----------|---------|
| Gjc3    | Gm13830 | Gm2542  | Hist1h2ah | Jak2    |
| Gjd2    | Gm13844 | Gm3227  | Hist1h4k  | Jmjd7   |
| Gm10277 | Gm13905 | Gm3435  | Hist1h4m  | Kat2b   |
| Gm10382 | Gm14306 | Gm9801  | Hist1h4n  | Kcnc2   |
| Gm10545 | Gm14327 | Gm9917  | Hist2h3c1 | Kcnc4   |
| Gm10654 | Gm14403 | Gm9954  | Hook1     | Kcnf1   |
| Gm10711 | Gm14418 | Gmps    | Hs2st1    | Kcnj12  |
| Gm1078  | Gm14493 | Gna13   | Hspa5     | Kcnj16  |
| Gm10979 | Gm14508 | Gpatch2 | Hyal2     | Kcnj3   |
| Gm11031 | Gm14873 | Gpc2    | Hyou1     | Kcnk10  |
| Gm11127 | Gm14966 | Gpc4    | Ido2      | Kcnk12  |
| Gm11192 | Gm15063 | Gpcpd1  | Ids       | Kcnk4   |
| Gm11423 | Gm15351 | Gpd1l   | lfi30     | Kcnmb2  |
| Gm11465 | Gm15384 | Gpr107  | lfitm1    | Kcnn2   |
| Gm11651 | Gm15441 | Gpr149  | lfnar2    | Kctd10  |
| Gm11670 | Gm15471 | Gpr153  | Igdcc3    | Kctd7   |
| Gm11706 | Gm15594 | Gpr37   | Igsf10    | Kdelc1  |
| Gm11739 | Gm15675 | Gpr75   | Igsf11    | Kdm4c   |
| Gm11802 | Gm15758 | Gprc5b  | Igsf6     | Kdm6a   |
| Gm12207 | Gm15879 | Grem2   | lkbkg     | Kif5b   |
| Gm12319 | Gm15938 | Grhl1   | lkzf1     | Kiss1r  |
| Gm12356 | Gm15998 | Gria4   | ll4i1     | Klf5    |
| Gm12371 | Gm16093 | Grik1   | Impad1    | Klhl1   |
| Gm12505 | Gm16104 | Gys1    | Ing3      | Klhl5   |
| Gm12655 | Gm16150 | H2-DMb2 | Ints12    | Klhl7   |
| Gm12689 | Gm16185 | H2-Q2   | Ints6     | Klhl9   |
| Gm12746 | Gm16234 | Hba-a1  | Ipo5      | Kpna3   |
| Gm13111 | Gm16253 | Hbb-b1  | Ipp       | Kremen2 |
| Gm13293 | Gm16344 | Hcfc2   | Iqcc      | Krit1   |
| Gm13298 | Gm16537 | Heph    | Itga10    | Larp4   |
| Gm13402 | Gm16721 | Hfe     | Iws1      | Lats2   |
| Gm13421 | Gm16907 | Hif3a   | Izumo4    | Lca5l   |

|         |         |          |          |          |
|---------|---------|----------|----------|----------|
| Lclat1  | Mapk6   | Mir491   | Negr1    | Pdgfc    |
| Lcorl   | Mast1   | Mir9-2   | Net1     | Pdik11   |
| Ldb3    | Matn4   | Mitf     | Nfyb     | Pdlim5   |
| Ldlr    | Mcm8    | Mlec     | Nlk      | Pfkfb4   |
| Ldlrap1 | Mcmbp   | Mlh3     | Nmnat2   | Pgm211   |
| Lfng    | Med1    | Mobkl1a  | Npff     | Pgm3     |
| Limd1   | Med17   | Morc4    | Nptx1    | Phf2011  |
| Lims2   | Memo1   | Mpp1     | Nr3c1    | Phf21b   |
| Lin28b  | Mertk   | Mpp5     | Nrg2     | Piga     |
| Lipa    | Mettl15 | Mrgpre   | Nsun7    | Pik3ip1  |
| Litaf   | Mfap3   | Mri1     | Nubp1    | Pik3r1   |
| Lix1l   | Mfng    | Msi2     | Nudt12   | Pip5kl1  |
| Lman1   | Mfsd2a  | Msl3     | Nudt21   | Pja2     |
| Lnx1    | Mfsd2b  | Mtf2     | Nup153   | Pkia     |
| Loxl3   | Mfsd7b  | Mtmr6    | Ocrl     | Pla2g6   |
| Lrig2   | Mgea5   | Mtpn     | Odf4     | Plcb4    |
| Lrrc16a | Mical2  | Mtrr     | Olfml1   | Plch1    |
| Lrrc48  | Mipol1  | Muc15    | Olfr1393 | Pld5     |
| Lrrc58  | Mir1193 | Mum1     | Optc     | Plekhh3  |
| Lrrtm1  | Mir1249 | Myadm    | Orc3     | Plin4    |
| Lrrtm3  | Mir155  | Myc      | Osgep    | Plk3     |
| Lrwd1   | Mir185  | Myst2    | P2ry13   | Pls1     |
| Lsp1    | Mir1897 | n-R5s202 | Pak2     | Plscr1   |
| Luc7l2  | Mir208b | N4bp2l2  | Panx2    | Plscr4   |
| Ly6a    | Mir27b  | Nacc1    | Paqr8    | Pml      |
| Ly6c1   | Mir3092 | Nacc2    | Parg     | Pmm2     |
| Lyz2    | Mir323  | Nbeal1   | Parp11   | Pmp22    |
| Mab21l1 | Mir331  | Nckipsd  | Pcgf6    | Pnpla8   |
| Mab21l2 | Mir370  | Ncoa7    | Pcmd1    | Polr3e   |
| Magel2  | Mir374c | Ndr1     | Pcyox1l  | Polr3k   |
| Map3k14 | Mir377  | Ndst3    | Pcyt1a   | Pomt2    |
| Mapk15  | Mir425  | Nefm     | Pcyt1b   | Ppargc1a |

|          |          |          |          |          |
|----------|----------|----------|----------|----------|
| Ppat     | Ranbp6   | Rnpc3    | Shroom1  | Spast    |
| Ppfibp1  | Ranbp9   | Rock2    | Slain2   | Spata5l1 |
| Ppp1r12a | Rap1gds1 | Rod1     | Slc10a3  | Spata6   |
| Ppp1r3d  | Rassf8   | Rpap2    | Slc10a7  | Spats1   |
| Ppp1r3e  | Raver2   | Rph3a    | Slc16a13 | Spin1    |
| Ppp2r3a  | Rb1cc1   | Rrm1     | Slc18a2  | Spin2    |
| Ppp2r5e  | Rbbp5    | Rsf1     | Slc22a15 | Spock1   |
| Pramef8  | Rbm15b   | Rsph10b2 | Slc2a4   | Spred1   |
| Prdm16   | Rbm45    | Rtkn2    | Slc35a3  | Spty2d1  |
| Prkab1   | Rc3h2    | Rufy2    | Slc35e2  | Srek1    |
| Prkab2   | Rcbtb1   | Rwdd2b   | Slc39a8  | Srpr     |
| Prkacb   | Rdh9     | Satb2    | Slc41a2  | Ssr1     |
| Prkar2a  | Rffl     | Sc5d     | Slc45a4  | Ssxb5    |
| Prkcq    | Rgl3     | Scn3b    | Slc4a10  | St18     |
| Prkg2    | Rgnef    | Scn5a    | Slc4a1ap | Stag1    |
| Prkra    | Rhbdd1   | Scx      | Slc4a7   | Stag2    |
| Prpf4    | Rhbdf1   | Sec23b   | Slc6a9   | Steap2   |
| Prps1l3  | Rhob     | Sec24d   | Slc7a6   | Stk38    |
| Prr18    | Rhobtb3  | Senp6    | Slitrk1  | Strbp    |
| Prrc1    | Rhoq     | Serinc1  | Slitrk2  | Stx17    |
| Prrg2    | Rhpn2    | Serpind1 | Smad5    | Stx3     |
| Psmd5    | Rif1     | Serpinh1 | Smc2     | Stxbp6   |
| Ptprk    | Rims4    | Sf3b1    | Smek2    | Sv2b     |
| Qk       | Rinl     | Sfrp2    | Smoc1    | Sybu     |
| Rab22a   | Rint1    | Sgcz     | Smurf2   | Syn1     |
| Rab23    | Ripply2  | Sh2d3c   | Snap91   | Taf1     |
| Rab27b   | Rlf      | Sh2d5    | Snord16a | Taf2     |
| Rab9b    | Rlim     | Sh2d6    | Snord19  | Tbc1d12  |
| Rabgap1  | Rnf145   | Sh3bgrl2 | Snx13    | Tbc1d5   |
| Racgap1  | Rnf152   | Sh3yl1   | Socs5    | Tbl2     |
| Rad51l3  | Rnf214   | Shisa6   | Sos2     | Tcf12    |
| Rad52    | Rnf31    | Shoc2    | Spag8    | Tcte2    |

|          |           |          |         |         |
|----------|-----------|----------|---------|---------|
| Tdrd3    | Tnfrsf4   | Usp11    | Zbtb46  | Zfp9    |
| Tecpr1   | Tnpo3     | Usp29    | Zbtb7b  | Zfp935  |
| Tgfb2    | Tollip    | Usp33    | Zbtb8b  | Zfp950  |
| Tgfb1    | Tonsl     | Usp40    | Zcchc11 | Zfp955b |
| Tha1     | Top2b     | Utp20    | Zcchc13 | Zhx1    |
| Thap2    | Tor1aip1  | Uty      | Zcchc16 | Zkscan5 |
| Thns1    | Tox       | Vat1l    | Zcchc24 | Zmat4   |
| Thsd7b   | Tox2      | Vegfa    | Zdhhc15 | Zmym4   |
| Timp2    | Traf6     | Vezt     | Zfp125  | Zranb3  |
| Tle6     | Trappc8   | Vps37a   | Zfp161  | Zscan2  |
| Tm6sf1   | Trib2     | Vsig10   | Zfp26   |         |
| Tm7sf3   | Trim17    | Vwa5b1   | Zfp266  |         |
| Tm9sf4   | Trim33    | Wdr17    | Zfp273  |         |
| Tmc4     | Trim37    | Wdr35    | Zfp275  |         |
| Tmem120b | Trim45    | Wdr48    | Zfp280c |         |
| Tmem145  | Trp53inp1 | Wdr5b    | Zfp324  |         |
| Tmem151b | Tsga14    | Wdr6     | Zfp395  |         |
| Tmem170b | Tspan2    | Wdr67    | Zfp397  |         |
| Tmem179b | Tspyl5    | Wdr75    | Zfp423  |         |
| Tmem188  | Ttc14     | Wdr85    | Zfp451  |         |
| Tmem194b | Ttll9     | Wipf3    | Zfp467  |         |
| Tmem229a | Ttr       | Wipi1    | Zfp472  |         |
| Tmem47   | Tubgcp3   | Wwp1     | Zfp57   |         |
| Tmem50b  | Txlng     | Xiap     | Zfp605  |         |
| Tmem56   | Uba6      | Xpo1     | Zfp612  |         |
| Tmem63a  | Ubash3b   | Xpo5     | Zfp623  |         |
| Tmem67   | Ube3a     | Xrcc6bp1 | Zfp644  |         |
| Tmem69   | Ube3c     | Ybx2     | Zfp654  |         |
| Tmem82   | Ubxn2a    | Yipf6    | Zfp689  |         |
| Tmpo     | Ubxn7     | Ywhag    | Zfp709  |         |
| Tmx3     | Uggt2     | Zbtb26   | Zfp780b |         |
| Tmx4     | Uncx      | Zbtb41   | Zfp828  |         |

| (iv) Transient decrease, C only | Neuro-peptide | Lipid | Cadherin type | GPCR kinases | Arrestins | Gb subunits | Gg subunits | RGS | Adenylate cycases | Phosphorylase b kinases | CREB | Cadherins | Proto-cadherins | 1094 |
|---------------------------------|---------------|-------|---------------|--------------|-----------|-------------|-------------|-----|-------------------|-------------------------|------|-----------|-----------------|------|
| Fzd9                            | +             |       |               |              |           |             |             |     |                   |                         |      |           |                 |      |
| Gipr                            | +             |       |               |              |           |             |             |     |                   |                         |      |           |                 |      |
| Nmbr                            | +             |       |               |              |           |             |             |     |                   |                         |      |           |                 |      |
| Npy5r                           | +             |       |               |              |           |             |             |     |                   |                         |      |           |                 |      |
| S1pr4                           |               | +     |               |              |           |             |             |     |                   |                         |      |           |                 |      |
| Grk6                            |               |       |               | +            |           |             |             |     |                   |                         |      |           |                 |      |
| Rgs19                           |               |       |               |              |           |             |             | +   |                   |                         |      |           |                 |      |
| Rgs9                            |               |       |               |              |           |             |             | +   |                   |                         |      |           |                 |      |
| Cdh13                           |               |       |               |              |           |             |             |     |                   |                         |      | +         |                 |      |

**More transient  
decrease,  
cocaine only**

|               |               |               |          |               |
|---------------|---------------|---------------|----------|---------------|
| 1110007C09Rik | 2610027K06Rik | 9230112E08Rik | Adat3    | Arhgef15      |
| 1110008J03Rik | 2610039C10Rik | 9330151L19Rik | Adora2a  | Arhgef16      |
| 1110034A24Rik | 2610507I01Rik | 9330159F19Rik | Aebp1    | Arhgef2       |
| 1110034G24Rik | 2810403A07Rik | 9530091C08Rik | Afmid    | Arhgef6       |
| 1110057K04Rik | 2810408M09Rik | A230050P20Rik | Agap3    | Arih2         |
| 1300002E11Rik | 2810410L24Rik | A230051N06Rik | Agpat1   | Arl16         |
| 1500015A07Rik | 2810459M11Rik | A230083G16Rik | Agpat9   | Armc8         |
| 1600027N09Rik | 2900008C10Rik | A730020E08Rik | Al450353 | Arpc1b        |
| 1700013F07Rik | 2900073G15Rik | A830036E02Rik | Aif1l    | Arrdc4        |
| 1700019G06Rik | 2900076A07Rik | A930017K11Rik | Alad     | Art3          |
| 1700020C07Rik | 2900079G21Rik | AA960436      | Aldh16a1 | Arvcf         |
| 1700020O03Rik | 3110021A11Rik | Aacs          | Aldh3b1  | Asb11         |
| 1700023F06Rik | 3110070M22Rik | Aars          | Alg14    | Asb4          |
| 1700054N08Rik | 3110082J24Rik | Abca8a        | Alg9     | Ascl1         |
| 1700088E04Rik | 3830431G21Rik | Abcb4         | Amdhd2   | Aspdh         |
| 1700121C10Rik | 4921536K21Rik | Abcd4         | Amn      | Atg7          |
| 1700123M08Rik | 4922502B01Rik | Abhd13        | Amn1     | Atg9a         |
| 1810012K08Rik | 4930430F08Rik | Abhd14b       | Anapc5   | Ath1          |
| 1810013D10Rik | 4930500J02Rik | Abhd16a       | Angel1   | Atp6v0a1      |
| 1810030O07Rik | 4930503L19Rik | Ablim2        | Ankra2   | AY074887      |
| 1810031K17Rik | 4930520K10Rik | Acbd4         | Ankrd13b | B230216G23Rik |
| 2010110P09Rik | 4930556J24Rik | Accn2         | Ankrd13d | B3galt4       |
| 2200002K05Rik | 4930570G19Rik | Actl6a        | Ankrd16  | B3gnt4        |
| 2310001K24Rik | 4931415C17Rik | Actl6b        | Ankrd34a | B4galt5       |
| 2310003C23Rik | 4933403O08Rik | Actn2         | Anks1b   | B830017H08Rik |
| 2310003H01Rik | 5330437I02Rik | Actn4         | Ap1b1    | Bag2          |
| 2310016C08Rik | 5730408K05Rik | Acy3          | Ap1g2    | Bap1          |
| 2410018L13Rik | 5730507C01Rik | Acyp1         | Ap4b1    | Bbs10         |
| 2510002D24Rik | 5830428H23Rik | Adam1a        | Ap4m1    | BC016222      |
| 2510012J08Rik | 5830433M19Rik | Adam23        | Apobec1  | BC017612      |
|               | 6230427J02Rik | Adam9         | Aqp11    | BC022687      |
|               | 8430410A17Rik | Adamts16      | Arfgap2  | BC031361      |

|               |          |         |               |               |
|---------------|----------|---------|---------------|---------------|
| BC037034      | Car7     | Celf1   | Crebl2        | Dem1          |
| BC048355      | Casq2    | Cenpl   | Crtc2         | Dennd2a       |
| BC057022      | Catsper2 | Cep5711 | Cryz          | Dfna5         |
| BC065397      | Cbx2     | Cep63   | Csrnp2        | Dgka          |
| BC067074      | Cbx4     | Cep76   | Csrp2bp       | Dgkz          |
| Bcan          | Cbx7     | Cfp     | Cstf1         | Diras1        |
| Bcl2l12       | Ccdc101  | Chd4    | Ctcf          | Dis3l         |
| Bcl7a         | Ccdc103  | Chd7    | Cx3cl1        | Dkk3          |
| Begain        | Ccdc111  | Chi3l1  | Cyb561d1      | Dlx2          |
| Bend7         | Ccdc134  | Chic1   | Cyp2t4        | Dnajib3       |
| Bgn           | Ccdc151  | Chkb    | Cyth1         | Doc2b         |
| Blcap         | Ccdc30   | Chrm4   | Cyth4         | Doc2g         |
| Bmi1          | Ccdc40   | Chst2   | D030028A08Rik | Dok7          |
| Bop1          | Ccdc42   | Chst8   | D19Bwg1357e   | Dolpp1        |
| Brd4          | Ccdc71   | Chtf8   | D19Ert4386e   | Dom3z         |
| Brsk2         | Ccdc77   | Cish    | D230037D09Rik | Dph1          |
| Bspry         | Ccdc79   | Ckap4   | D330050116Rik | Dpp3          |
| C030030A07Rik | Ccdc92   | Clasrp  | D4Ert422e     | Dpysl4        |
| C030048B08Rik | Ccne2    | Clcf1   | D6Wsu116e     | Dram2         |
| C130046K22Rik | Ccng2    | Clic3   | D7Ert443e     | Drd1a         |
| C1qtnf6       | Ccnjl    | Clic6   | Dak           | Drd2          |
| C2cd2l        | Cd151    | Cln3    | Dand5         | Dtwd2         |
| C2cd4c        | Cd276    | Cln6    | Dbc1          | Dusp10        |
| C630043F03Rik | Cdc20    | Cntf    | Dbn1          | Dusp28        |
| C730034F03Rik | Cdc40    | Cog3    | Dcaf11        | Dusp7         |
| Cables1       | Cdc42ep1 | Col11a2 | Dck           | Dzip1l        |
| Cacna2d3      | Cdca4    | Col23a1 | Ddn           | E130218I03Rik |
| Cacnb3        | Cdca8    | Colec12 | Ddx11         | E130307A14Rik |
| Cage1         | Cdhr1    | Coro1b  | Ddx27         | E130309F12Rik |
| Calcoco1      | Cdk16    | Cpne5   | Ddx46         | E230016M11Rik |
| Camkv         | Cdyl     | Cpne6   | Ddx54         | E230029C05Rik |
| Capn2         | Cecr6    | Cpsf3   | Dedd2         | E2f6          |



|               |          |         |         |         |
|---------------|----------|---------|---------|---------|
| E430018J23Rik | Fam132a  | Fkrp    | Gm11728 | Gm16266 |
| Eaf1          | Fam134c  | Fmnl1   | Gm11744 | Gm16312 |
| Eaf2          | Fam171a1 | Fnip2   | Gm11815 | Gm16707 |
| Efcab10       | Fam174a  | Foxn2   | Gm11974 | Gm16731 |
| Efcab4b       | Fam179a  | Foxo1   | Gm12258 | Gm16845 |
| Efna1         | Fam184b  | Fst     | Gm12279 | Gm16892 |
| Efnb1         | Fam189b  | Fut10   | Gm12316 | Gm16994 |
| Egln1         | Fam18a   | Galnt11 | Gm12339 | Gm17018 |
| Eif4ebp1      | Fam195a  | Galntl4 | Gm12360 | Gm17029 |
| Elmod2        | Fam203a  | Galt    | Gm12525 | Gm4285  |
| Elovl2        | Fam20c   | Gas8    | Gm12758 | Gm4841  |
| Emp2          | Fam3a    | Gba2    | Gm13031 | Gm4980  |
| Engase        | Fam55d   | Gbx1    | Gm13706 | Gm5868  |
| Entpd3        | Fam5b    | Gclc    | Gm13965 | Gm5914  |
| Ephb1         | Fam65a   | Gdpd5   | Gm14169 | Gm6578  |
| Ephb4         | Fam69b   | Gemin4  | Gm14286 | Gm7694  |
| Ercc3         | Fam69c   | Gemin6  | Gm14302 | Gm9776  |
| Ercc4         | Fancb    | Ggt7    | Gm14326 | Gm9887  |
| Ercc5         | Fance    | Gimap6  | Gm14378 | Gm9905  |
| Erf           | Fancf    | Gins2   | Gm14443 | Gmeb1   |
| Ergic1        | Fbrs     | Gltf    | Gm14565 | Golga1  |
| Esyt3         | Fbxl15   | Gm10037 | Gm14817 | Golga5  |
| Ets2          | Fbxl2    | Gm10118 | Gm15396 | Gpatch1 |
| Ewsr1         | Fbxl3    | Gm10306 | Gm15510 | Gpatch3 |
| Exoc1         | Fbxo17   | Gm10345 | Gm15511 | Gpr12   |
| Exosc3        | Fbxo42   | Gm10395 | Gm15512 | Gpr137b |
| Exosc4        | Fbxw8    | Gm10615 | Gm15545 | Gpr27   |
| Extl1         | Fcgrt    | Gm10643 | Gm15605 | Gpr6    |
| Faf2          | Fer1l5   | Gm10657 | Gm15945 | Gpr83   |
| Fam114a1      | Fgf18    | Gm10942 | Gm15980 | Gpr88   |
| Fam123a       | Fhl3     | Gm11193 | Gm16211 | Gpsm3   |
| Fam131c       | Fkbp7    | Gm11641 | Gm16241 | Grand2  |

|           |          |          |          |           |
|-----------|----------|----------|----------|-----------|
| Grwd1     | Hmmr     | Isg15    | Lcp1     | Mcf2l     |
| Gsk3a     | Hnrnpul2 | Islr2    | Ldoc1    | Mcoln1    |
| Gspt1     | Hps4     | Isyna1   | Lgals9   | Med20     |
| Gtf2h4    | Hr       | ltga7    | Lgi3     | Med22     |
| Gtf2ird1  | Hrct1    | ltgb3bp  | Lhfp15   | Med24     |
| Gtf2ird2  | Hs3st1   | ltpk1    | Lig4     | Meis1     |
| Gtf3c2    | Hs3st5   | ltpkc    | Lmbr1    | Meis2     |
| Gtpbp6    | Hsf1     | ltprpl1  | Lor      | Meis3     |
| Gucy1b3   | Hvcn1    | lvns1abp | Lrfn4    | Mex3c     |
| Gusb      | Icam2    | Jarid2   | Lrrc14b  | Micall2   |
| Gzmm      | Icam4    | Jsrp1    | Lrrc27   | Mier2     |
| H13       | Icam5    | Kat2a    | Lrrc29   | Miip      |
| H1fx      | Id1      | Katnb1   | Lrrc33   | Mina      |
| H2-BI     | Ido1     | Kazald1  | Lrrcc1   | Mir127    |
| H2-K1     | Iffo1    | Kcna5    | Lrrn2    | Mir135a-1 |
| H2afx     | Ifit2    | Kcng1    | Lrrn3    | Mir1839   |
| H2afy3    | Igfbp2   | Kcnh3    | Lrrtm4   | Mir1895   |
| Haus2     | Ikbkap   | Kcnh4    | Ltbr     | Mir1906-2 |
| Hbp1      | Ikzf4    | Kcnh8    | Ltc4s    | Mir1963   |
| Hcn2      | Il17d    | Kcnk6    | Ltk      | Mir1982   |
| Hdac10    | Il17rc   | Kcnn1    | Ly6g6f   | Mir199a-2 |
| Hdac7     | Il21r    | Kcnv1    | Ly86     | Mir199b   |
| Heatr8    | Il3ra    | Kctd1    | Lztr1    | Mir22     |
| Helb      | Impdh1   | Kdm5a    | Mafk     | Mir24-1   |
| Higd1b    | Inf2     | Kif3b    | Man1b1   | Mir24-2   |
| Hist1h2ac | Ing4     | Kit      | Man2c1   | Mir29c    |
| Hist1h2ad | Inha     | Klc4     | Maneal   | Mir3057   |
| Hist1h2ap | Inpp11   | Klf16    | Map2k3   | Mir3060   |
| Hist1h4d  | Insig2   | Kptn     | Map2k5   | Mir3074-1 |
| Hist2h2be | Intu     | Krt12    | Mapk11   | Mir3074-2 |
| Hmbs      | Ipo13    | Lars     | Mapkapk3 | Mir3093   |
| Hmg20b    | Irf8     | Lck      | Mark4    | Mir324    |

|            |          |         |          |           |
|------------|----------|---------|----------|-----------|
| Mir343     | Myh14    | Ovca2   | Pik3r5   | Ptpn5     |
| Mir3475    | Myh7     | P2rx7   | Plagl2   | Ptpn6     |
| Mir369     | n-R5s76  | Pacrgl  | Plcd3    | Ptpra     |
| Mir412     | N4bp3    | Pacsin2 | Plcg2    | Pttg1ip   |
| Mir541     | Nadsyn1  | Paip2b  | Plek     | Pusl1     |
| Mir679     | Naprt1   | Pak4    | Plekhg5  | Pvrl2     |
| Mir688     | Nckap5l  | Pank4   | Plk2     | Pwwp2b    |
| Mir702     | Ncs1     | Paqr6   | Plk5     | Pxmp4     |
| Mirlet7c-2 | Ndrg4    | Pard6b  | Plscr3   | Pygb      |
| Mknk1      | Nek3     | Parp1   | Plxdc1   | Rab11fip2 |
| Mlst8      | Nfatc2ip | Parp12  | Pm20d2   | Rab15     |
| Mmgt1      | Nhlrc1   | Pcid2   | Pold1    | Rab3il1   |
| Mmp14      | Ninj2    | Pcyt2   | Polm     | Radil     |
| Mmp17      | Ninl     | Pdcd2   | Polr1e   | Rai2      |
| Mmp2       | Nmnat1   | Pde1b   | Pot1b    | Ranbp3    |
| Mmrn2      | Npas2    | Pde4b   | Ppap2c   | Rap1gap   |
| Mms19      | Npepl1   | Pdim7   | Ppfia4   | Rap2c     |
| Morc2b     | Npl      | Pdyn    | Ppm1d    | Rarb      |
| Mpg        | Npm3     | Pelp1   | Ppp1r10  | Rarg      |
| Mpp3       | Nr1d1    | Pepd    | Ppp1r16a | Rasgef1a  |
| Mpzl1      | Nr1h2    | Pex11a  | Ppp1r7   | Rasgef1b  |
| Mras       | Nr2e1    | Pex14   | Ppp1r9b  | Rasgrp1   |
| Mreg       | Nrxn3    | Pex26   | Prkcz    | Rasip1    |
| Msi1       | Ntn4     | Pex3    | Prkx     | Rassf3    |
| Msl3l2     | Nudt16   | Pex5    | Prmt6    | Rassf7    |
| Mthfr      | Nudt17   | Pfas    | Proz     | Rbm28     |
| Mthfsd     | Numbl    | Pfkip   | Prr7     | Rbm34     |
| Mtmr11     | Nupl2    | Pgam2   | Prrt2    | Rbm5      |
| Mtmr4      | Nupr1    | Pgbd5   | Prss36   | Rcor2     |
| Mtmr7      | Olfir545 | Phf1    | Prtn3    | Rcor3     |
| Mttp       | Osbpl2   | Pigb    | Ptgs1    | Recql     |
| Mvp        | Osgin2   | Pigm    | Ptk7     | Reep6     |

|         |          |          |            |          |
|---------|----------|----------|------------|----------|
| Refbp2  | Scarna6  | Slc26a8  | Snx11      | Synpo    |
| Relt    | Scly     | Slc27a4  | Snx32      | Syt12    |
| Rg9mtd2 | Scmh1    | Slc29a2  | Socs7      | T2       |
| Rg9mtd3 | Scn4b    | Slc2a5   | Sorbs3     | Tacc2    |
| Rian    | Scube1   | Slc35d3  | Sox1       | Taf6     |
| Ric8    | Sdad1    | Slc35f4  | Sox10      | Taf8     |
| Rilpl1  | Sdccag3  | Slc37a2  | Sp7        | Tagap1   |
| Rilpl2  | Sdf4     | Slc6a8   | Spata2L    | Tagln    |
| Rin2    | Sdr42e1  | Slc7a8   | Speg       | Tap2     |
| Rnf103  | Sec61a1  | Slc9a3r2 | Spop       | Tarbp2   |
| Rnf112  | Sema4a   | Slk      | Sptlc1     | Tas1r1   |
| Rnf135  | Sema4b   | Simap    | Srgn       | Tbc1d22a |
| Rnf165  | Serinc4  | Slx4     | Srl        | Tbce     |
| Rnf169  | Sertad3  | Smarcd1  | Srp72      | Tbkbp1   |
| Rnf216  | Sertad4  | Smug1    | Srprb      | Tcerg1   |
| Rnf32   | Setmar   | Smyd5    | Srxn1      | Tcf3     |
| Rom1    | Sf1      | Snora17  | Ssbp2      | Tcfe3    |
| Rpap1   | Sf3a1    | Snora20  | St3gal6    | Tchh     |
| Rprd1a  | Sft2d3   | Snora2b  | St6galnac4 | Tcn2     |
| Rps6ka4 | Sgsm3    | Snora3   | St6galnac5 | Tekt2    |
| Rras2   | Sh2b1    | Snora43  | Stac2      | Telo2    |
| Rrnad1  | Sh3gl1   | Snora47  | Stard5     | Tesk1    |
| Rtkn    | Sin3b    | Snora52  | Stat2      | Tex261   |
| Rundc1  | Sip1     | Snora64  | Stat6      | Tgfb1    |
| Rundc3b | Slc10a4  | Snora69  | Stk30      | Tgif2    |
| Rxrg    | Slc11a1  | Snord100 | Stk36      | Thap7    |
| S100pbp | Slc12a4  | Snord17  | Strada     | Thoc5    |
| Safb2   | Slc12a9  | Snord49b | Stxbp2     | Tifab    |
| Sall3   | Slc16a9  | Snord69  | Sulf1      | Tigd3    |
| Samd1   | Slc1a4   | Snord72  | Supt7l     | Tigit    |
| Scarb1  | Slc20a2  | Snord82  | Suz12      | Tjp2     |
| Scarf2  | Slc22a12 | Snord88c | Syng2      | Tmc3     |

|          |         |         |         |
|----------|---------|---------|---------|
| Tmeff1   | Tspan15 | Vstm2b  | Zfp3    |
| Tmem101  | Tssk6   | Vtn     | Zfp341  |
| Tmem109  | Ttc39c  | Vwa1    | Zfp362  |
| Tmem115  | Ttl     | Vwa3a   | Zfp385b |
| Tmem136  | Ttl11   | Wdr3    | Zfp408  |
| Tmem158  | Ttl5    | Wdr34   | Zfp444  |
| Tmem170  | Ttyh2   | Wfdc1   | Zfp445  |
| Tmem175  | Tubgcp2 | Wipf1   | Zfp498  |
| Tmem198  | Tuft1   | Wtip    | Zfp511  |
| Tmem200b | Tulp3   | X99384  | Zfp560  |
| Tmem229b | Txnrd3  | Xkr8    | Zfp574  |
| Tmem43   | Tyro3   | Xkrx    | Zfp599  |
| Tmem5    | Tyw1    | Xpnpep1 | Zfp618  |
| Tmem53   | U05342  | Xrcc1   | Zfp64   |
| Tmem63b  | Ubn1    | Xrcc6   | Zfp661  |
| Tmem81   | Ubox5   | Xylt2   | Zfp692  |
| Tmem90b  | Ubxn10  | Yif1a   | Zfp740  |
| Tmf1     | Umps    | Yjefn3  | Zfp748  |
| Tmprss5  | Unc45a  | Ythdf2  | Zfp787  |
| Tmtc4    | Unk     | Yy1     | Zfp810  |
| Toe1     | Upb1    | Zbtb1   | Zfp882  |
| Top3b    | Urod    | Zbtb20  | Zfp93   |
| Tor2a    | Usp36   | Zbtb9   | Zfp934  |
| Traf4    | Usp51   | Zdhhc3  | Zfp94   |
| Trib3    | Uvrag   | Zdhhc7  | Zfp945  |
| Trim26   | Vangl1  | Zfp128  | Zfp97   |
| Trmt1    | Vasp    | Zfp146  | Zfyve27 |
| Trmt2a   | Vim     | Zfp157  | Zmynd10 |
| Trpc7    | Vmac    | Zfp180  | Znrf2   |
| Trpv2    | Vps4b   | Zfp202  | Zscan18 |
| Trub2    | Vps52   | Zfp212  | Zyx     |
| Tsku     | Vps8    | Zfp213  |         |



**Sustained  
decrease  
cocaine &  
withdrawal**

|               |               |               |               |               |
|---------------|---------------|---------------|---------------|---------------|
| 0610007C21Rik | 1190007F08Rik | 1700049G17Rik | 2010305A19Rik | 2500003M10Rik |
| 0610007L01Rik | 1300014I06Rik | 1700052K11Rik | 2010320M18Rik | 2510006D16Rik |
| 0610007P14Rik | 1500003O03Rik | 1700052N19Rik | 2010321M09Rik | 2610002I17Rik |
| 0610009E02Rik | 1500009C09Rik | 1700058G18Rik | 2210013O21Rik | 2610015P09Rik |
| 0610009L18Rik | 1500009L16Rik | 1700060J05Rik | 2210016F16Rik | 2610017I09Rik |
| 0610010F05Rik | 1500011B03Rik | 1700066M21Rik | 2210016L21Rik | 2610019F03Rik |
| 0610010K14Rik | 1500011H22Rik | 1700091E21Rik | 2210020M01Rik | 2610027L16Rik |
| 0610010O12Rik | 1500011K16Rik | 1700096K18Rik | 2210403K04Rik | 2610029I01Rik |
| 0610037P05Rik | 1500012F01Rik | 1700106N22Rik | 2210404J11Rik | 2610035D17Rik |
| 0910001L09Rik | 1500016L03Rik | 1700113A16Rik | 2210404O07Rik | 2610044O15Rik |
| 1110001A16Rik | 1500017E21Rik | 1700123L14Rik | 2310001A20Rik | 2610203C22Rik |
| 1110003E01Rik | 1500031L02Rik | 1700123O20Rik | 2310003F16Rik | 2610306M01Rik |
| 1110003O08Rik | 1600002K03Rik | 1700128F08Rik | 2310004N24Rik | 2610528B01Rik |
| 1110004E09Rik | 1600012H06Rik | 1810006K21Rik | 2310009B15Rik | 2700023E23Rik |
| 1110004F10Rik | 1700001L19Rik | 1810008A18Rik | 2310011J03Rik | 2700029M09Rik |
| 1110005A03Rik | 1700001O22Rik | 1810013L24Rik | 2310022A10Rik | 2700046G09Rik |
| 1110018N20Rik | 1700001P01Rik | 1810014B01Rik | 2310033P09Rik | 2700060E02Rik |
| 1110021L09Rik | 1700003E16Rik | 1810022K09Rik | 2310036O22Rik | 2700073G19Rik |
| 1110032A03Rik | 1700003M02Rik | 1810026B05Rik | 2310039H08Rik | 2810008D09Rik |
| 1110034B05Rik | 1700007K13Rik | 1810026J23Rik | 2310044H10Rik | 2810008M24Rik |
| 1110038F14Rik | 1700008O03Rik | 1810030N24Rik | 2310045N01Rik | 2810025M15Rik |
| 1110049F12Rik | 1700009P17Rik | 1810037I17Rik | 2310047B19Rik | 2810032G03Rik |
| 1110051M20Rik | 1700011J10Rik | 1810055G02Rik | 2310050B05Rik | 2810405F15Rik |
| 1110054M08Rik | 1700012B09Rik | 1810059H22Rik | 2310061C15Rik | 2810405K02Rik |
| 1110059E24Rik | 1700019D03Rik | 1810063B07Rik | 2400003C14Rik | 2810422J05Rik |
| 1110065P20Rik | 1700019E19Rik | 2010001M06Rik | 2410001C21Rik | 2810425M01Rik |
| 1110067D22Rik | 1700022I11Rik | 2010002M12Rik | 2410002O22Rik | 2810432D09Rik |
| 1190002H23Rik | 1700025K23Rik | 2010003O02Rik | 2410004B18Rik | 2900002K06Rik |
| 1190005I06Rik | 1700027A23Rik | 2010007H12Rik | 2410004P03Rik | 2900010J23Rik |
|               | 1700029I15Rik | 2010011I20Rik | 2410022L05Rik | 2900011O08Rik |
|               | 1700029J07Rik | 2010107G23Rik | 2410042D21Rik | 2900053A13Rik |
|               | 1700047A11Rik | 2010204K13Rik | 2410076I21Rik | 3110001D03Rik |

|               |               |               |          |          |
|---------------|---------------|---------------|----------|----------|
| 3110001I22Rik | 4933421E11Rik | 9530059O14Rik | Acp1     | AK010878 |
| 3110003A17Rik | 4933433P14Rik | 9530077C05Rik | Acpt     | Akap17b  |
| 3110035E14Rik | 5031426D15Rik | 9530082P21Rik | Actr1a   | Akirin2  |
| 3110043A19Rik | 5033430I15Rik | 9830144P21Rik | Actr2    | Akr1a4   |
| 3110043O21Rik | 5133401N09Rik | 9930021D14Rik | Actr3b   | Akt1     |
| 3632451O06Rik | 5430416N02Rik | 9930104L06Rik | Actr8    | Akt1s1   |
| 4732415M23Rik | 5430417L22Rik | A030003K02Rik | Acy1     | Aldoart1 |
| 4732487G21Rik | 5530601H04Rik | A230087F16Rik | Adcyap1  | Alg1     |
| 4732491K20Rik | 5730403B10Rik | A2ld1         | Adipor1  | Alg3     |
| 4831440E17Rik | 5730409E04Rik | A430005L14Rik | Adprh    | Alg8     |
| 4921523A10Rik | 5730437N04Rik | A430108G06Rik | Adss     | Alkbh2   |
| 4921524J17Rik | 5730455O13Rik | A530040E14Rik | Adssl1   | Alkbh4   |
| 4930404I05Rik | 5730494M16Rik | A530058N18Rik | Aen      | Amd1     |
| 4930404N11Rik | 5730508B09Rik | A530064D06Rik | Aftph    | Amd2     |
| 4930405A21Rik | 5730577I03Rik | A630089N07Rik | Agbl3    | Ammecr1  |
| 4930412F15Rik | 5830415F09Rik | A730017C20Rik | Agfg2    | Anapc11  |
| 4930420K17Rik | 5830427D03Rik | A830039N20Rik | Agpat6   | Anapc13  |
| 4930429F24Rik | 5930416I19Rik | A930005H10Rik | Ahsa1    | Anapc2   |
| 4930444A02Rik | 6030408B16Rik | A930013F10Rik | AI118078 | Ang      |
| 4930452B06Rik | 6030446N20Rik | A930029G22Rik | AI314976 | Angptl6  |
| 4930453N24Rik | 6430573F11Rik | AA465934      | AI316807 | Ankdd1b  |
| 4930455F23Rik | 6720456B07Rik | Aamp          | AI413582 | Ankmy2   |
| 4930506C21Rik | 6820408C15Rik | Aarsd1        | AI414108 | Ankrd27  |
| 4930511M06Rik | 8430410K20Rik | Aasdhppt      | AI462493 | Ankrd32  |
| 4930518I15Rik | 8430429K09Rik | Aatf          | AI467606 | Ankrd37  |
| 4930538E20Rik | 9030407P20Rik | Abcf3         | AI606181 | Ankrd40  |
| 4930550G17Rik | 9030425E11Rik | Abhd3         | AI836003 | Ankrd54  |
| 4930579G24Rik | 9030625A04Rik | Abi3          | AI846148 | Ano10    |
| 4931408A02Rik | 9130011J15Rik | Acd           | AI854517 | Ano2     |
| 4931414P19Rik | 9130020K20Rik | Acin1         | Aif1     | Anp32a   |
| 4933407L21Rik | 9230110C19Rik | Acnat1        | Aimp1    | Anp32b   |
| 4933408J17Rik | 9430023L20Rik | Acot7         | Aip      | Anxa5    |



|          |         |               |               |          |
|----------|---------|---------------|---------------|----------|
| Anxa6    | Arl4d   | Atl2          | B3galtl       | BC028801 |
| Anxa7    | Arl6    | Atox1         | B3gat3        | BC029722 |
| Ap1ar    | Arl6ip1 | Atp1a2        | B3gnt1        | BC031181 |
| Ap1s1    | Arl6ip4 | Atp1b1        | B3gnt2        | BC031781 |
| Ap1s3    | Arl6ip5 | Atp2b1        | B3gnt8        | BC055324 |
| Ap2s1    | Arl6ip6 | Atp6ap1       | B4galt2       | BC056474 |
| Ap3s1    | Arl8a   | Atp6ap1l      | B4galt3       | Bcap31   |
| Ap3s2    | Armcx6  | Atp6v0b       | B4galt7       | Bcas2    |
| Ap4s1    | Arpc1a  | Atp6v0c       | B630005N14Rik | Bccip    |
| Apbb1    | Arpc3   | Atp6v0d1      | B930041F14Rik | Bcl10    |
| Apbb3    | Arpc4   | Atp6v0e       | B9d2          | Bcl7b    |
| Aph1a    | Arpc5   | Atp6v0e2      | Baalc         | Bcl7c    |
| Apip     | Arpc5l  | Atp6v1b2      | Bag3          | Bco2     |
| Apln     | Arpp19  | Atp6v1c1      | Baiap2        | Bdnf     |
| Apoa2    | Arrdc2  | Atp6v1d       | Banf1         | Bean1    |
| Apobr    | Arxes1  | Atp6v1f       | Barx2         | Becn1    |
| Apoc1    | Arxes2  | Atp6v1g1      | Basp1         | Bet1     |
| Apoe     | Asb16   | Atp6v1g2      | BB218582      | Bet1l    |
| Apoo     | Ascc1   | Atp6v1h       | Bbip1         | Bex1     |
| Arc      | Ascl4   | Atpbd4        | BC002059      | Bex2     |
| Arf1     | Asf1a   | Atxn10        | BC002230      | Bex4     |
| Arf5     | Ash2l   | Atxn7l2       | BC003266      | Bfsp2    |
| Arfgap1  | Asna1   | Atxn7l3b      | BC003331      | Bin1     |
| Arhgap10 | Asrgl1  | Aup1          | BC003965      | Bin3     |
| Arhgap44 | Atf4    | Aven          | BC004004      | Birc3    |
| Arhgdib  | Atf5    | Avp           | BC005561      | Blmh     |
| Arhgdig  | Atg10   | Avpi1         | BC005624      | Bloc1s2  |
| Arhgef25 | Atg12   | B230118H07Rik | BC013529      | Bms1     |
| Arid4a   | Atg16l1 | B230206F22Rik | BC016495      | Bmyc     |
| Arl1     | Atg5    | B230206L02Rik | BC017643      | Bnip1    |
| Arl3     | Atg9b   | B230340J04Rik | BC019943      | Bod1     |
| Arl4a    | Atl1    | B3galnt2      | BC023202      | Bola2    |

|               |               |          |          |          |
|---------------|---------------|----------|----------|----------|
| Bola3         | C1qc          | Capza2   | Ccdc53   | Cd59a    |
| Bpgm          | C1qtnf5       | Capzb    | Ccdc55   | Cd63     |
| Brd2          | C2            | Car2     | Ccdc65   | Cd72     |
| Brd3          | C230029F24Rik | Cars     | Ccdc72   | Cd81     |
| Brd7          | C230052I12Rik | Casc3    | Ccdc74a  | Cd82     |
| Brdt          | C330006A16Rik | Casp8ap2 | Ccdc86   | Cd9      |
| Bre           | C330007P06Rik | Cbln2    | Ccdc9    | Cdadc1   |
| Bri3          | C330021F23Rik | Cbr1     | Ccdc94   | Cdc123   |
| Brix1         | C530005A16Rik | Cbs      | Cck      | Cdc14b   |
| Brms1         | C630004H02Rik | Cbwd1    | Ccl21a   | Cdc34    |
| Brms1l        | C80913        | Cbx3     | Ccl25    | Cdc37    |
| Brpf1         | C8g           | Cby1     | Ccna2    | Cdc42    |
| Bscl2         | Cab39l        | Ccar1    | Ccnd2    | Cdc42ep2 |
| Btbd1         | Cabp1         | Ccdc107  | Ccnadbp1 | Cdc42ep3 |
| Btbd16        | Cacng2        | Ccdc109b | Ccnh     | Cdc42ep4 |
| Btbd6         | Cacng3        | Ccdc112  | Ccni     | Cdc42se2 |
| Btd           | Cacng5        | Ccdc113  | Ccnk     | Cdc5l    |
| Btf3          | Cacybp        | Ccdc115  | Ccnl2    | Cdipt    |
| Btf3l4        | Cadm4         | Ccdc12   | Ccs      | Cdk10    |
| Btg1          | Calb2         | Ccdc124  | Cct2     | Cdk11b   |
| Btg3          | Cald1         | Ccdc13   | Cct3     | Cdk2ap1  |
| Bub3          | Calm1         | Ccdc132  | Cct4     | Cdk4     |
| Bud31         | Calm2         | Ccdc138  | Cct5     | Cdk5     |
| Bysl          | Calm3         | Ccdc153  | Cct6a    | Cdk5r2   |
| Bzw2          | Calr          | Ccdc21   | Cd2bp2   | Cdk5rap3 |
| C030034I22Rik | Caly          | Ccdc22   | Cd300lg  | Cdk9     |
| C030044B11Rik | Camk2g        | Ccdc25   | Cd302    | Cdkl2    |
| C030046I01Rik | Camk2n1       | Ccdc28a  | Cd320    | Cdkn2d   |
| C130022K22Rik | Camk2n2       | Ccdc28b  | Cd37     | Cdo1     |
| C130074G19Rik | Cap1          | Ccdc36   | Cd3eap   | Cebpg    |
| C1galt1c1     | Capns1        | Ccdc38   | Cd47     | Celf2    |
| C1qa          | Caps2         | Ccdc47   | Cd52     | Cend1    |

|        |         |         |            |         |
|--------|---------|---------|------------|---------|
| Cenpa  | Churc1  | Cnih2   | Cort       | Cstf2t  |
| Cenpc1 | Ciao1   | Cnih4   | Cotl1      | Cstf3   |
| Cenpo  | Ciabin1 | Cnn3    | Cox19      | Ctage5  |
| Cenpv  | Cib2    | Cnot3   | Cpa6       | Ctbp1   |
| Cep57  | Cideb   | Cnot4   | Cpe        | Ctdspl  |
| Ces2b  | Cir1    | Cnot7   | Cpne9      | Ctgf    |
| Ces2f  | Cirbp   | Cnpy2   | Cpsf2      | Cthrc1  |
| Cetn2  | Cited1  | Cnpy3   | Cpsf7      | Ctla2a  |
| Cetn3  | Cited4  | Cobra1  | Cpxm1      | Ctnnb1  |
| Cetn4  | Cldn26  | Coch    | Crabp1     | Ctnnd1  |
| Cfdp1  | Clec2l  | Coil    | Cradd      | Ctsf    |
| Cfl1   | Clec3b  | Col9a2  | Crb2       | Ctsh    |
| Cfl2   | Clic1   | Col9a3  | Creld1     | Ctsl    |
| Cgref1 | Clint1  | Commd1  | Crhbp      | Ctss    |
| Chac1  | Clip4   | Commd10 | Crip1      | Ctsz    |
| Chac2  | Clk1    | Commd2  | Crip2      | Ctnn    |
| Chaf1a | Clk3    | Commd3  | Cript      | Ctxn1   |
| Chchd6 | Clk4    | Commd5  | Crif2      | Ctxn2   |
| Chga   | Clp1    | Commd6  | Crmp1      | Cuedc2  |
| Chgb   | Clptm1l | Commd7  | Crtac1     | Cul2    |
| Chka   | Clstn3  | Commd8  | Cryba4     | Cul4a   |
| Chmp1a | Clta    | Commd9  | Csdc2      | Cuta    |
| Chmp2a | Cltb    | Cope    | Csgalnact2 | Cutc    |
| Chmp4b | Cluap1  | Cops3   | Csnk1e     | Cwc15   |
| Chmp5  | Cmas    | Cops4   | Csnk1g2    | Cwc27   |
| Chmp6  | Cmb1    | Cops6   | Csnk2a1    | Cwf19l2 |
| Chn1   | Cmpk1   | Cops7a  | Csnk2a2    | Cxcl14  |
| Chrac1 | Cmtm3   | Cops7b  | Csnk2b     | Cxcl16  |
| Chst12 | Cmtm5   | Cops8   | Csrnp1     | Cxx1a   |
| Chst5  | Cmtm7   | Copz1   | Csrp1      | Cxx1b   |
| Chsy1  | Cnbp    | Coq10a  | Cst3       | Cxx1c   |
| Chtf18 | Cnih    | Coro1a  | Cstb       | Cyb5d2  |

|               |         |         |          |               |
|---------------|---------|---------|----------|---------------|
| Cyb5r4        | Dapp1   | Ddx47   | Dnaja1   | Dpm3          |
| Cyb5rl        | Darc    | Ddx5    | Dnaja2   | Dpp7          |
| Cybasc3       | Dars    | Ddx55   | Dnaja4   | Drap1         |
| Cygb          | Dazap2  | Ddx59   | Dnajib1  | Drg1          |
| Cyp2j6        | Dbnidd2 | Deb1    | Dnajib11 | Dtd1          |
| Cyp46a1       | Dbnl    | Decr2   | Dnajib2  | Dtnb          |
| Cyp4f15       | Dbp     | Def6    | Dnajib4  | Dtnbp1        |
| Cyp4x1        | Dbx2    | Degs2   | Dnajc12  | Dtwd1         |
| Cyp51         | Dcaf12  | Denr    | Dnajc2   | Dusp1         |
| Cyth2         | Dcaf13  | Der12   | Dnajc21  | Dusp12        |
| D030055H07Rik | Dcaf4   | Der13   | Dnajc7   | Dusp14        |
| D030056L22Rik | Dcaf6   | Dexi    | Dnajc8   | Dync1i2       |
| D10Wsu52e     | Dcp1b   | Dgcr6   | Dnajc9   | Dync2li1      |
| D11Wsu99e     | Dctn3   | Dhps    | Dnalc4   | Dynll2        |
| D14Ert449e    | Dctn5   | Dhrs13  | Dnali1   | Dynlrb1       |
| D17Wsu104e    | Dctpp1  | Dhrs3   | Dnd1     | Dynlt1e       |
| D17Wsu92e     | Dcun1d3 | Dhrs7   | Dnm3os   | Dynlt1f       |
| D230025D16Rik | Dcun1d5 | Dhx15   | Dnpep    | Dynlt3        |
| D2Wsu81e      | Ddb1    | Dhx16   | Dnttip1  | E130306D19Rik |
| D330041H03Rik | Ddb2    | Dhx40   | Dnttip2  | E130309D02Rik |
| D4Wsu53e      | Ddc     | Dio2    | Dohh     | E130311K13Rik |
| D630023F18Rik | Ddhd2   | Dirc2   | Dok1     | E230015B07Rik |
| D630028G08Rik | Ddost   | Dkc1    | Dok3     | E2f4          |
| D830025C05Rik | Ddrgk1  | Dlx1    | Dok5     | E530001K10Rik |
| D830030K20Rik | Ddt     | Dlx1as  | Donson   | Eapp          |
| D8Ert4738e    | Ddx10   | Dlx6    | Dpcd     | Ebna1bp2      |
| D930016D06Rik | Ddx18   | Dlx6as  | Dpf2     | Ebpl          |
| Dact3         | Ddx23   | Dmkn    | Dph2     | Ecd           |
| Dad1          | Ddx24   | Dmrtc1a | Dph3     | Echdc1        |
| Daglb         | Ddx25   | Dmwd    | Dph5     | Ecscr         |
| Dalrd3        | Ddx39b  | Dnaic1  | Dpm1     | Edc3          |
| Dapk3         | Ddx42   | Dnaic2  | Dpm2     | Edf1          |

|         |        |          |          |         |
|---------|--------|----------|----------|---------|
| Eef1a1  | Eif3b  | Emx2     | Ezr      | Fam195b |
| Eef1a2  | Eif3c  | Enho     | F8a      | Fam19a4 |
| Eef1b2  | Eif3d  | Eno1     | Faah     | Fam19a5 |
| Eef1d   | Eif3e  | Eno2     | Fads2    | Fam3c   |
| Eef1e1  | Eif3f  | Enoph1   | Fads3    | Fam43a  |
| Eef1g   | Eif3g  | Ensa     | Fah      | Fam54b  |
| Efcab2  | Eif3h  | Entpd6   | Fam101b  | Fam57b  |
| Efemp2  | Eif3i  | Eny2     | Fam103a1 | Fam69a  |
| Efha2   | Eif3j  | Epb4.1l2 | Fam105a  | Fam76a  |
| Efhd2   | Eif3k  | Epb4.9   | Fam108a  | Fam76b  |
| Efna3   | Eif3m  | Epdr1    | Fam108b  | Fam78a  |
| Egfem1  | Eif4a1 | Eprs     | Fam110a  | Fam81a  |
| Eglf7   | Eif4a2 | Ercc1    | Fam113b  | Fam86   |
| Eglf8   | Eif4a3 | Ergic3   | Fam114a2 | Fam89b  |
| Egln2   | Eif4b  | Erh      | Fam117a  | Fam96a  |
| Egr1    | Eif4e  | Eri1     | Fam118b  | Fam96b  |
| Egr4    | Eif4e2 | Eri3     | Fam122a  | Fam98b  |
| Ei24    | Eif4h  | Ermap    | Fam122b  | Farp2   |
| Eid1    | Eif5a  | Erp29    | Fam126a  | Farsb   |
| Eid2    | Eif5b  | Esco1    | Fam129c  | Fbl     |
| Eif1    | Eif6   | Esd      | Fam133b  | Fbxl22  |
| Eif1a   | Elavl3 | Esf1     | Fam158a  | Fbxl4   |
| Eif1ad  | Elmod1 | Etnk2    | Fam163b  | Fbxl6   |
| Eif2a   | Elmod3 | Etohd2   | Fam165b  | Fbxo2   |
| Eif2ak1 | Elov1  | Evl      | Fam166a  | Fbxo22  |
| Eif2b1  | Elp2   | Exosc1   | Fam166b  | Fbxo25  |
| Eif2b2  | Elp3   | Exosc5   | Fam173a  | Fbxo4   |
| Eif2b4  | Emd    | Exosc6   | Fam174b  | Fbxo44  |
| Eif2b5  | Eme1   | Exosc7   | Fam181a  | Fbxw2   |
| Eif2s2  | Emg1   | Ext1     | Fam181b  | Fbxw4   |
| Eif2s3y | Eml1   | Extl2    | Fam188a  | Fbxw7   |
| Eif3a   | Eml2   | Ezh1     | Fam192a  | Fcf1    |

|         |               |         |         |         |
|---------|---------------|---------|---------|---------|
| Fchsd1  | Ftsj1         | Gdap111 | Gm10220 | Gm12264 |
| Fdft1   | Ftsj3         | Gdap2   | Gm10337 | Gm12355 |
| Fer     | Fuca1         | Gde1    | Gm10397 | Gm12720 |
| Fez2    | Fundc1        | Gdf1    | Gm10401 | Gm12744 |
| Fgd4    | Fundc2        | Gdi1    | Gm10406 | Gm12802 |
| Fgf9    | Fut8          | Gdpd1   | Gm10558 | Gm12835 |
| Fhad1   | Fxr2          | Gemin7  | Gm10660 | Gm12841 |
| Fibp    | Fxyd1         | Gemin8  | Gm10699 | Gm12908 |
| Fkbp1a  | Fxyd2         | Get4    | Gm10762 | Gm12925 |
| Fkbp2   | Fxyd3         | Gfap    | Gm11100 | Gm12942 |
| Fkbp3   | Fxyd6         | Gfod2   | Gm11160 | Gm12953 |
| Fkbp5   | G0s2          | Gfpt2   | Gm11175 | Gm12965 |
| Fkbp9   | G530011O06Rik | Gfra4   | Gm11266 | Gm12992 |
| Flot1   | Gabarap       | Ggct    | Gm11273 | Gm12999 |
| Flot2   | Gabarapl1     | Ggh     | Gm11345 | Gm13068 |
| Flrt3   | Gabarapl2     | Ggnbp2  | Gm11457 | Gm13530 |
| Flywch1 | Gabrg2        | Ghdc    | Gm11491 | Gm13540 |
| Flywch2 | Gadd45b       | Gins3   | Gm11537 | Gm13558 |
| Fmr1    | Gadd45g       | Gins4   | Gm11574 | Gm13589 |
| Fn3k    | Gale          | Gjb1    | Gm11627 | Gm13625 |
| Fn3krp  | Galk2         | Gjb6    | Gm11636 | Gm13634 |
| Fndc4   | Galns         | Gla     | Gm11714 | Gm13645 |
| Fndc5   | Galnt12       | Glipr1  | Gm11772 | Gm13704 |
| Fndc8   | Gamt          | Glmn    | Gm11808 | Gm13789 |
| Fnta    | Gap43         | Glo1    | Gm11818 | Gm13977 |
| Fntb    | Gar1          | Glrx3   | Gm11837 | Gm14004 |
| Fos     | Gart          | Gltpd1  | Gm11842 | Gm14226 |
| Fosb    | Gas2          | Gltsr2  | Gm11944 | Gm14305 |
| Foxo4   | Gas2l2        | Gm10069 | Gm12027 | Gm14597 |
| Foxp3   | Gas5          | Gm10125 | Gm12033 | Gm14703 |
| Fstl1   | Gatad1        | Gm10143 | Gm12060 | Gm14827 |
| Ftl1    | Gba           | Gm10177 | Gm12195 | Gm14872 |

|         |         |        |         |               |
|---------|---------|--------|---------|---------------|
| Gm15265 | Gm16096 | Gm5065 | Gna15   | Grhpr         |
| Gm15344 | Gm16099 | Gm5136 | Gnai2   | Grin3b        |
| Gm15461 | Gm16161 | Gm5148 | Gnl1    | Grina         |
| Gm15492 | Gm16235 | Gm5151 | Gnl2    | Grinl1a       |
| Gm15514 | Gm16286 | Gm52   | Gnl3    | Gripap1       |
| Gm15601 | Gm16378 | Gm5506 | Gnpda2  | Grtp1         |
| Gm15612 | Gm16517 | Gm5595 | Gnptg   | Gsta3         |
| Gm15642 | Gm16532 | Gm5617 | Gnrh1   | Gstm1         |
| Gm15648 | Gm16534 | Gm5887 | Golga4  | Gstm3         |
| Gm15717 | Gm16536 | Gm6251 | Golga7b | Gstm5         |
| Gm15718 | Gm16586 | Gm6537 | Gorasp2 | Gstm6         |
| Gm15756 | Gm166   | Gm6813 | Got1    | Gstm7         |
| Gm15809 | Gm16606 | Gm6900 | Gp1bb   | Gsto1         |
| Gm15825 | Gm16723 | Gm8394 | Gpatch4 | Gstp1         |
| Gm15829 | Gm16728 | Gm867  | Gppb111 | Gstp2         |
| Gm15830 | Gm1673  | Gm88   | Gpc3    | Gt(ROSA)26Sor |
| Gm15832 | Gm16740 | Gm9104 | Gpi1    | Gtdc1         |
| Gm15884 | Gm16755 | Gm9396 | Gpn1    | Gtf2b         |
| Gm15887 | Gm16765 | Gm9746 | Gpn2    | Gtf2f1        |
| Gm15903 | Gm16832 | Gm9750 | Gpr137  | Gtf2h3        |
| Gm15912 | Gm16894 | Gm9752 | Gpr151  | Gtf2h5        |
| Gm15944 | Gm16984 | Gm9780 | Gpr19   | Gtf2i         |
| Gm15952 | Gm2000  | Gm9828 | Gpr3    | Gtf3a         |
| Gm15954 | Gm2245  | Gm9839 | Gpr3711 | Gtf3c5        |
| Gm15956 | Gm2415  | Gm9851 | Gpr61   | Gtf3c6        |
| Gm15962 | Gm2464  | Gm9885 | Gpr62   | Gtl3          |
| Gm15964 | Gm266   | Gm9934 | Gps1    | Guk1          |
| Gm16024 | Gm3693  | Gm9996 | Gpt     | Gulp1         |
| Gm1604A | Gm3696  | Gmcl1  | Gramd3  | H2-D1         |
| Gm16052 | Gm4117  | Gmnn   | Grb14   | H2-DMa        |
| Gm16062 | Gm4535  | Gmpr   | Grb2    | H2-Ke2        |
| Gm16069 | Gm4694  | Gna11  | Grccl0  | H2-Q1         |

|         |           |          |         |           |
|---------|-----------|----------|---------|-----------|
| H2-Q6   | Hexim1    | Hnrnpc   | Hsph1   | Ilk       |
| H2-T22  | Hey1      | Hnrnpd   | Htatsf1 | Ilvbl     |
| H2-T9   | Heyl      | Hnrnpf   | Htr3a   | Imp3      |
| H2afj   | Hgs       | Hnrnph1  | Htra1   | Impa1     |
| H2afv   | Hhatl     | Hnrnph2  | Htra3   | Impdh2    |
| H2afy   | Hint1     | Hnrnph3  | Hyal3   | Inadl     |
| H2afz   | Hirip3    | Hnrnpk   | Hyi     | Ing2      |
| H3f3a   | Hist1h2ab | Hnrnpl   | Hyls1   | Ino80e    |
| H3f3b   | Hist1h2bj | Hnrnpm   | Ica1    | Inpp5a    |
| Habp4   | Hist1h2bk | Hnrnpr   | Ica1l   | Ints5     |
| Hap1    | Hist1h2bl | Hnrpll   | Icam1   | Ip6k2     |
| Hars    | Hist1h4a  | Homer3   | Id3     | Ipo11     |
| Hat1    | Hist3h2ba | Hook2    | Ier3    | Ipo4      |
| Haus1   | Hmg1l1    | Hopx     | Ier3ip1 | Iqcd      |
| Haus5   | Hmga1     | Hp1bp3   | Ier5    | Iqcg      |
| Haus7   | Hmgb1     | Hpgd     | Ier5l   | Iqck      |
| Haus8   | Hmgb2     | Hprt     | Iffo2   | Irak2     |
| Hbegf   | Hmgb3     | Hras1    | Ifng2   | Irf2bp1   |
| Hbs1l   | Hmgn1     | Hrasls   | Ifrd1   | Irf3      |
| Hbxip   | Hmgn2     | Hrh1     | Ift27   | Irf5      |
| Hcfc1r1 | Hmgn3     | Hrh3     | Ift46   | Irf9      |
| Hcrt    | Hmgn5     | Hs3st4   | Ift74   | Isl1      |
| Hdac11  | Hmox2     | Hsbp1    | Igbp1   | Ily1      |
| Hdac2   | Hn1       | Hsd11b1  | Igfbp3  | Iltfg2    |
| Hdac3   | Hnf1a     | Hsd17b11 | Igfbp4  | Iltfg3    |
| Hdac5   | Hnf1b     | Hsf4     | Igfbp6  | Iltga2b   |
| Hdgf    | Hnmt      | Hsp90aa1 | Igsf5   | Iltgb1bp1 |
| Hdhd2   | Hnrnpa0   | Hsp90b1  | Ik      | Iltm2b    |
| Heat3   | Hnrnpa1   | Hspa4    | Ikbip   | Iltm2c    |
| Herpud1 | Hnrnpa2b1 | Hspb11   | Ii34    | Jagn1     |
| Hes5    | Hnrnpa3   | Hspb8    | Ii5ra   | Jam3      |
| Hexa    | Hnrnpab   | Hspbp1   | Ilf2    | Jdp2      |



|         |         |          |          |          |
|---------|---------|----------|----------|----------|
| Jkamp   | Kif3a   | Larp6    | Lrrc51   | Magoh    |
| Jmjd6   | Kifc3   | Larp7    | Lrrc6    | Magohb   |
| Josd1   | Klc1    | Lbh      | Lrrc61   | Malat1   |
| Jun     | Klf10   | Lcat     | Lrrfip1  | Mamdc4   |
| Junb    | Klf11   | Lcmt1    | Lrrfip2  | Maml1    |
| Jund    | Klf6    | Ldb1     | Lsm1     | Manbal   |
| Kat5    | Klf9    | Lenep    | Lsm10    | Manf     |
| Kcmf1   | Klhdc3  | Leng9    | Lsm14b   | Map1lc3a |
| Kcnab1  | Klhdc4  | Lepr     | Lsm2     | Map1lc3b |
| Kcnab2  | Klhdc8a | Leprel4  | Lsm3     | Map2k1   |
| Kcnab3  | Klhdc8b | Lgals3bp | Lsm4     | Map3k12  |
| Kcnip1  | Klhdc9  | Lgi1     | Lsm7     | Mapkapk2 |
| Kcnip4  | Klhl10  | Lgi4     | Lsmd1    | Mapre3   |
| Kcnj9   | Klhl21  | Lhx5     | Lta4h    | Mapt     |
| Kcnk1   | Klhl8   | Limd2    | Luc7l3   | March11  |
| Kcnk2   | Klraq1  | Lin52    | Ly6e     | March2   |
| Kcnmb4  | Kpna2   | Lin7b    | Ly6h     | March9   |
| Kcnu1   | Krcc1   | Llph     | Lyar     | Marcksl1 |
| Kctd12b | Krr1    | Lmna     | Lyl1     | Mark3    |
| Kctd13  | Krt1    | Lmnb1    | Lypd6b   | Mb       |
| Kctd14  | Krt10   | Lmo3     | Lypla2   | Mbd3     |
| Kctd5   | Krt222  | Lmo4     | Lyplal1  | Mblac1   |
| Kctd6   | Kti12   | Lonrf1   | Lysmd2   | Mblac2   |
| Kctd9   | Ktn1    | Lpcat4   | Lzts2    | Mbp      |
| Kdelr1  | L3mbtl2 | Lrch2    | M6pr     | Mbtd1    |
| Kdelr2  | Lage3   | Lrrc23   | Mad2l1   | Mcart6   |
| Kdm4a   | Lamp1   | Lrrc40   | Mad2l1bp | Mcf2     |
| Kdsr    | Lamtor2 | Lrrc41   | Mad2l2   | Mcfd2    |
| Khdrbs2 | Lamtor3 | Lrrc42   | Maea     | Mcm5     |
| Khdrbs3 | Laptm4a | Lrrc47   | Maf      | Mcm6     |
| Khk     | Laptm4b | Lrrc49   | Maged2   | Mcts1    |
| Kif20a  | Larp1   | Lrrc50   | Mageh1   | Mcts2    |

|          |            |            |          |          |
|----------|------------|------------|----------|----------|
| Mdk      | Mgat2      | Mlc1       | Mt2      | Nanos3   |
| Mdm1     | Mgat4b     | Mlf2       | Mt3      | Nans     |
| Mdm2     | Mgst3      | Mlit11     | Mta1     | Nap111   |
| Mdp1     | Mia1       | Mlph       | Mtap4    | Nap113   |
| Mea1     | Midn       | Mmd2       | Mtap7d2  | Nap114   |
| Med10    | Mif        | Mmp19      | Mterfd2  | Napa     |
| Med21    | Mios       | Mmp24      | Mthfd2l  | Narfl    |
| Med28    | Mir1191    | Mns1       | Muc6     | Nat14    |
| Med29    | Mir1224    | Moap1      | Muted    | Nat8     |
| Med30    | Mir132     | Mobkl2c    | Mvd      | Ncbp2    |
| Med4     | Mir1892    | Mobkl3     | Mvk      | Ncdn     |
| Men1     | Mir1898    | Mocs2      | Mxd4     | Ncf1     |
| Mepce    | Mir207     | Mog        | Mybph    | Ncf2     |
| Mesdc2   | Mir21      | Mogat1     | Mycbp    | Ncf4     |
| Metap2   | Mir2145-2  | Morf4l1    | Mycl1    | Nck1     |
| Metrn    | Mir29b-2   | Morf4l2    | Mycn     | Ncl      |
| Mettl1   | Mir3091    | Morn4      | Myeov2   | Ndfip1   |
| Mettl10  | Mir3099    | Morn5      | Myl6     | Ndn      |
| Mettl2   | Mir383     | Mospd1     | Myl6b    | Ndnl2    |
| Mettl21d | Mir670     | Mospd3     | Mylpf    | Ndrp3    |
| Mettl22  | Mir671     | Moxd1      | Myst1    | Ndufa4l2 |
| Mettl3   | Mir677     | Mphosph6   | Mzt1     | Necab2   |
| Mettl5   | Mir678     | Mphosph8   | Mzt2     | Necab3   |
| Mettl9   | Mir686     | Mpnd       | n-R5s185 | Necap1   |
| Mex3a    | Mir703     | Mpp6       | N6amt2   | Nedd8    |
| Mfap1a   | Mir704     | Mpped2     | Naa10    | Nefl     |
| Mfap1b   | Mir707     | Mrap2      | Naa15    | Neil2    |
| Mfge8    | Mirlet7c-1 | Mrfap1     | Naa35    | Nek2     |
| Mfsd1    | Mis12      | Mro        | Naa38    | Nek4     |
| Mfsd5    | Mitd1      | Mrpl23-ps1 | Naaa     | Nek7     |
| Mfsd8    | Mki67ip    | Msl1       | Naca     | Nell1    |
| Mgat1    | Mkks       | Mt1        | Nae1     | Nell2    |

|         |         |          |          |        |
|---------|---------|----------|----------|--------|
| Nemf    | Nom1    | Nsfl1c   | Oaz1     | Paip1  |
| Nenf    | Nono    | Nsg1     | Obfc2b   | Paip2  |
| Neu1    | Nop10   | Nsg2     | Odc1     | Pak1   |
| Nexn    | Nop14   | Nsmce4a  | Odf2l    | Pan3   |
| Nfe2l1  | Nop16   | Nsun2    | Ogfrl1   | Paqr4  |
| Nfe2l2  | Nop2    | Nsun4    | Olfm1    | Pard6a |
| Nfil3   | Nop56   | Nsun5    | Olfml2b  | Pax6   |
| Nfkb2   | Nop58   | Nsun6    | Olfr1392 | Pbxip1 |
| Nfkbia  | Nova1   | Nt5c3l   | Olfr613  | Pcbd1  |
| Nfxl1   | Nox1    | Nt5e     | Orai3    | Pcbp1  |
| Nfyc    | Npb     | Ntan1    | Orc5     | Pcbp2  |
| Ng23    | Npc2    | Ntm      | ORF61    | Pcgf2  |
| Ngb     | Npcd    | Ntrk1    | Ormdl2   | Pcmt1  |
| Ngdn    | Npdc1   | Nts      | Ormdl3   | Pcna   |
| Ngf     | Npepps  | Nub1     | Os9      | Pcnp   |
| Ngfrap1 | Npnt    | Nubp2    | Osbp1a   | Pcp4   |
| Ngrn    | Nprl2   | Nucks1   | Oscp1    | Pcp4l1 |
| Nhej1   | Nptn    | Nudc     | Ost4     | Pcsk1n |
| Nipa2   | Npy     | Nudcd2   | Ostc     | Pdap1  |
| Nkain1  | Nqo1    | Nudt1    | Ostf1    | Pdcd10 |
| Nkain4  | Nr1i3   | Nudt16l1 | Ostm1    | Pdcd4  |
| Nkapl   | Nr2c2ap | Nudt18   | Otub1    | Pdcd5  |
| Nkiras2 | Nr4a1   | Nudt3    | Otud1    | Pdcd6  |
| Nkx2-1  | Nr4a3   | Nudt5    | Otx2     | Pdcl3  |
| Nkx6-2  | Nrarp   | Nup107   | Ovgp1    | Pddc1  |
| Nme7    | Nrbp1   | Nup37    | Oxt      | Pdgfa  |
| Nmi     | Nrgn    | Nup62    | P4ha2    | Pdia5  |
| Nmral1  | Nrip3   | Nus1     | P4hb     | Pdlim2 |
| Nmt1    | Nrm     | Nxn      | Pabpc1   | Pdlim4 |
| Nnat    | Nrsn1   | Nxph3    | Pabpc4   | Pdpn   |
| Nog     | Nrsn2   | Nxt1     | Pabpn1   | Pdxdc1 |
| Nol10   | Nsa2    | Nxt2     | Paf1     | Pdpx   |

|         |          |          |          |          |
|---------|----------|----------|----------|----------|
| Pdzd11  | Phf7     | Plekhhb1 | Polr2c   | Ppp1r3c  |
| Pdzd4   | Phgdh    | Plekhj1  | Polr2d   | Ppp1r3f  |
| Pdzd9   | Phpt1    | Plekho1  | Polr2e   | Ppp1r3g  |
| Pdzrn4  | Phxr4    | Plin2    | Polr2g   | Ppp1r8   |
| Pef1    | Phyhip   | Plk1s1   | Polr2h   | Ppp2ca   |
| Pelo    | Pi15     | Plip     | Polr2i   | Ppp2cb   |
| Penk    | Pi16     | Plod2    | Polr2j   | Ppp2r1a  |
| Per1    | Pi4k2a   | Plp1     | Polr2k   | Ppp2r2a  |
| Pes1    | Pias1    | Plp2     | Polr2l   | Ppp2r2d  |
| Pfdn1   | Pias2    | Pls3     | Polr3b   | Ppp2r4   |
| Pfdn2   | Pigf     | Pmch     | Pomp     | Ppp2r5b  |
| Pfdn4   | Pigp     | Pmepa1   | Pop1     | Ppp2r5c  |
| Pfdn5   | Pigs     | Pmm1     | Pop5     | Ppp2r5d  |
| Pfkl    | Pigu     | Pmvk     | Pou2f2   | Ppp3cb   |
| Pfkm    | Pigyl    | Pnck     | Ppa1     | Ppp3cc   |
| Pfn1    | Pih1d1   | Pnkp     | Ppap2a   | Ppp3r1   |
| Pfn4    | Pik3c3   | Pnma5    | Ppdf     | Ppp4c    |
| Pgam1   | Pik3ca   | Pnn      | Ppef2    | Ppp4r1   |
| Pgap3   | Pilra    | Pnp2     | Ppia     | Ppp5c    |
| Pgcp    | Pim1     | Pnpo     | Ppib     | Ppt1     |
| Pgd     | Pin1     | Pnrc1    | Ppie     | Ppwd1    |
| Pgk1    | Pip4k2a  | Pnrc2    | Ppig     | Pqbp1    |
| Pgpep1  | Pip5k1b  | Poc1a    | Ppil3    | Pqlc1    |
| Pgpep1l | Pitpna   | Pofut2   | Ppil4    | Praf2    |
| Pgrmc1  | Pja1     | Pold4    | Ppm1g    | Prcc     |
| Pgrmc2  | Pla2g12a | Poldip3  | Ppp1ca   | Prep     |
| Phax    | Pla2g16  | Pole3    | Ppp1r11  | Prickle4 |
| Phc2    | Pla2g7   | Pole4    | Ppp1r12c | Prim2    |
| Phf14   | Plac9    | Polh     | Ppp1r14b | Prkag1   |
| Phf20   | Plau     | Polk     | Ppp1r15a | Prkar1b  |
| Phf23   | Plcb2    | Polr1c   | Ppp1r1a  | Prkrip1  |
| Phf5a   | Plekha2  | Polr1d   | Ppp1r2   | Prmt1    |

|         |        |         |         |        |
|---------|--------|---------|---------|--------|
| Prnp    | Psmd1  | Pvrl1   | Rabl5   | Rbfox1 |
| Prpf19  | Psmd10 | Pwwp2a  | Rac1    | Rbfox3 |
| Prpf3   | Psmd11 | Pxmp3   | Rac3    | Rbm17  |
| Prpf31  | Psmd12 | Pycr2   | Rad1    | Rbm18  |
| Prpf38b | Psmd13 | Pygo2   | Rad18   | Rbm24  |
| Prpf39  | Psmd14 | Qpct    | Rad23a  | Rbm25  |
| Prpf40b | Psmd2  | Qpctl   | Rad50   | Rbm42  |
| Prpsap1 | Psmd3  | Qsox1   | Rad54l  | Rbm43  |
| Prpsap2 | Psmd4  | R3hcc1  | Rad9    | Rbm4b  |
| Prr24   | Psmd6  | R3hdm2  | Rad9b   | Rbm6   |
| Prr3    | Psmd7  | Rab12   | Rae1    | Rbm7   |
| Prss23  | Psmd8  | Rab13   | Rai12   | Rbm8a  |
| Psat1   | Psmd9  | Rab14   | Ralb    | Rbmx2  |
| Psenen  | Psme1  | Rab21   | Ralbp1  | Rbmxrt |
| Psg16   | Psme2  | Rab26   | Ralgps2 | Rbp1   |
| Psip1   | Psme3  | Rab2b   | Raly1   | Rbx1   |
| Psm1    | Psmg2  | Rab31   | Ramp1   | Rcan1  |
| Psm14   | Psmg3  | Rab33a  | Ramp2   | Rcc1   |
| Psm15   | Pspc1  | Rab34   | Ran     | Rchy1  |
| Psm17   | Ptges3 | Rab3a   | Ranbp1  | Rcn1   |
| Psm18   | Ptgis  | Rab3b   | Rangap1 | Rdh12  |
| Psm19   | Ptma   | Rab3ip  | Rangr   | Rdh5   |
| Psm20   | Ptms   | Rab4a   | Rap1b   | Rdm1   |
| Psm21   | Ptn    | Rab5a   | Rarres2 | Rec8   |
| Psm22   | Ptov1  | Rab5c   | Rasgrp4 | Reep2  |
| Psm23   | Ptp4a2 | Rab7    | Rasl10a | Reep4  |
| Psm24   | Ptpn2  | Rab8a   | Rasl11a | Reep5  |
| Psm25   | Ptpn3  | Rabac1  | Rassf1  | Renbp  |
| Psm26   | Puf60  | Rabgef1 | Raver1  | Repin1 |
| Psm27   | Pus3   | Rabggta | Rbbp4   | Resp18 |
| Psm28   | Pus7   | Rabggtb | Rbbp6   | Rest   |
| Psm29   | Pvalb  | Rabl3   | Rbbp7   | Rev1   |

|          |        |          |         |          |
|----------|--------|----------|---------|----------|
| Rexo4    | Rnf149 | Rpl14    | Rsl1d1  | Sat1     |
| Rfc1     | Rnf168 | Rpl15    | Rsl24d1 | Satb1    |
| Rfc4     | Rnf170 | Rpl21    | Rsph9   | Sav1     |
| Rfc5     | Rnf180 | Rpl23a   | Rsrc2   | Sbds     |
| Rhbdd3   | Rnf181 | Rpl27    | Rtf1    | Sbsn     |
| Rhcg     | Rnf187 | Rpl28    | Rtl1    | Sc4mol   |
| Rheb     | Rnf2   | Rpl30    | Rtn1    | Scamp3   |
| Rhox8    | Rnf208 | Rpl31    | Rtn4    | Scamp5   |
| Riiad1   | Rnf215 | Rpl35    | Rtn4r   | Scand1   |
| Rimklb   | Rnf220 | Rpl36a   | Rtn4r12 | Scarna17 |
| Riok2    | Rnf25  | Rpl36al  | Rufy1   | Scg2     |
| Rit1     | Rnf34  | Rpl37a   | Rufy3   | Scg3     |
| Rit2     | Rnf43  | Rpl41    | Rundc3a | Scg5     |
| Rlbp1    | Rnf6   | Rpn1     | Runx1t1 | Schip1   |
| Rltpr    | Rnf7   | Rpn2     | Ruvbl1  | Scn1b    |
| Rmrp     | Rnh1   | Rpp14    | Ruvbl2  | Scn2b    |
| Rnase4   | Rnpep  | Rpp21    | Rwdd1   | Scnm1    |
| Rnaseh2a | Rnps1  | Rpp25    | Ryk     | Scoc     |
| Rnaseh2b | Rnu7   | Rpp38    | S100a1  | Scrn3    |
| Rnaseh2c | Rogdi  | Rprm     | S100a13 | Scrt2    |
| Rnasek   | Rorb   | Rprml    | S100a16 | Sdc4     |
| Rnd1     | Rp9    | Rps19bp1 | S100a6  | Sdccag8  |
| Rnd2     | Rpa1   | Rqcd1    | S100b   | Sdf2     |
| Rnd3     | Rpa2   | Rrad     | Sac3d1  | Sdr39u1  |
| Rnf10    | Rpain  | Rraga    | Sae1    | Sec11a   |
| Rnf113a2 | Rpap3  | Rragb    | Safb    | Sec13    |
| Rnf114   | Rpf2   | Rrbp1    | Sap18   | Sec23ip  |
| Rnf126   | Rpgr   | Rrp1     | Sap30   | Sec61b   |
| Rnf128   | Rpia   | Rrp36    | Sap30bp | Sec62    |
| Rnf139   | Rpl12  | Rrp7a    | Sar1b   | Sel1l3   |
| Rnf14    | Rpl13  | Rrp8     | Sarnp   | Selenbp1 |
| Rnf146   | Rpl13a | Rrp9     | Sart1   | Selk     |

|           |          |          |          |         |
|-----------|----------|----------|----------|---------|
| Selm      | Shfm1    | Slc48a1  | Snord12  | Socs2   |
| Senp3     | Shisa4   | Slc7a10  | Snord123 | Sostdc1 |
| Senp8     | Shox2    | Slc7a4   | Snord14d | Sox11   |
| Sephs2    | Siae     | Slc7a6os | Snord14e | Sox13   |
| Sept1     | Siah2    | Sln      | Snord33  | Sox2    |
| Sept2     | Sil1     | Sln      | Snord35a | Sox3    |
| Sept5     | Six3     | Sltm     | Snord38a | Sox9    |
| Sept7     | Skp1a    | Slu7     | Snord8   | Spa17   |
| Sept9     | Sla2     | Smad2    | Snord95  | Spag1   |
| Sepw1     | Slc15a3  | Smarcb1  | Snord96a | Spata24 |
| Sepx1     | Slc16a3  | Smarcd3  | Snrnp27  | Spata3  |
| Serf2     | Slc16a6  | Smarce1  | Snrnp40  | Spata7  |
| Serp1     | Slc17a5  | Smc1a    | Snrpa    | Spata9  |
| Serp2     | Slc17a7  | Smn1     | Snrpa1   | Spats2  |
| Serpinb6a | Slc22a17 | Smox     | Snrpb    | Spats21 |
| Sertad1   | Slc24a6  | Smpd1    | Snrpb2   | Spc24   |
| Set       | Slc26a10 | Smpd2    | Snrpc    | Spcs1   |
| Setd3     | Slc26a11 | Smyd4    | Snrpd1   | Spcs2   |
| Setd4     | Slc2a12  | Snap29   | Snrpd2   | Spdya   |
| Setd6     | Slc2a3   | Snap47   | Snrpd3   | Spg20   |
| Sez6l2    | Slc30a5  | Snapc2   | Snrpe    | Spg21   |
| Sf3a3     | Slc35a1  | Snapc3   | Snrpf    | Sphk1   |
| Sf3b2     | Slc35c2  | Snapin   | Snrpn    | Sphk2   |
| Sgce      | Slc35e4  | Snf8     | Snurf    | Spint2  |
| Sgta      | Slc35f2  | Snhg10   | Snw1     | Spns2   |
| Sh2b2     | Slc35f5  | Snhg12   | Snx1     | Spock3  |
| Sh3bgrl3  | Slc37a3  | Snhg5    | Snx17    | Spp1    |
| Sh3bp1    | Slc39a1  | Snora24  | Snx18    | Spry2   |
| Sh3gl3    | Slc39a12 | Snora33  | Snx2     | Spryd3  |
| Sh3rf2    | Slc39a6  | Snora41  | Snx22    | Spsb2   |
| Shb       | Slc39a7  | Snora65  | Snx24    | Spsb3   |
| Shf       | Slc45a1  | Snora68  | Snx3     | Sqstm1  |

|            |         |          |          |          |
|------------|---------|----------|----------|----------|
| Sra1       | Stk16   | Svip     | Tbc1d22b | Thoc1    |
| Srd5a3     | Stk19   | Syf2     | Tbc1d7   | Thoc6    |
| Srek1ip1   | Stk25   | Syngr3   | Tbcb     | Thoc7    |
| Srm        | Stmn1   | Syp      | Tbcd     | Thumpd1  |
| Srp14      | Stmn2   | Syt11    | Tbpl1    | Thy1     |
| Srp9       | Stmn3   | Syt16    | Tbrg1    | Thyn1    |
| Srpk1      | Stmn4   | Syt5     | Tcea2    | Tiam2    |
| Srrt       | Stoml1  | Sytl2    | Tceal1   | Tigd2    |
| Srsf11     | Stradb  | Syvn1    | Tceal3   | Tipin    |
| Srsf3      | Strn3   | Tac1     | Tceal5   | Tlcd1    |
| Srsf4      | Stub1   | Tada2a   | Tceal6   | Tlk2     |
| Srsf5      | Stx18   | Taf10    | Tceal7   | Tm2d2    |
| Srsf7      | Stx1a   | Taf11    | Tceal8   | Tm2d3    |
| Srsf9      | Stx4a   | Taf13    | Tceb2    | Tm6sf2   |
| Ssb        | Stx5a   | Taf15    | Tcf4     | Tm7sf2   |
| Ssbp3      | Stx6    | Taf1b    | Tcfap4   | Tmbim6   |
| Sspn       | Stx8    | Taf1d    | Tcfcp2   | Tmcc1    |
| Ssr2       | Styk1   | Taf3     | Tcp1     | Tmco1    |
| Ssr4       | Suds3   | Taf9     | Tcte1    | Tmed2    |
| Ssrp1      | Sult1a1 | Taf9b    | Tdp2     | Tmed3    |
| Sst        | Sult4a1 | Tagap    | Tead2    | Tmed4    |
| Ssu72      | Sumf1   | Tagln3   | Tecr     | Tmed5    |
| St3gal3    | Sumf2   | Taldo1   | Tekt1    | Tmed9    |
| St3gal4    | Sumo1   | Tank     | Tekt5    | Tmem100  |
| St3gal5    | Sumo2   | Tapt1    | Terf1    | Tmem111  |
| St6galnac6 | Sumo3   | Tardbp   | Tesk2    | Tmem119  |
| St8sia3    | Sun2    | Tarsl2   | Tfip11   | Tmem127  |
| Stampb     | Supt16h | Tasp1    | Tgds     | Tmem128  |
| Stard3nl   | Supt4h1 | Tatdn1   | Th1l     | Tmem132a |
| Stau1      | Supt4h2 | Tax1bp1  | Thap4    | Tmem134  |
| Stau2      | Surf2   | Tbc1d10b | Thap6    | Tmem138  |
| Stk11      | Susd3   | Tbc1d17  | Thnsl2   | Tmem141  |



|          |           |          |          |         |
|----------|-----------|----------|----------|---------|
| Tmem147  | Tmem87a   | Tpm1     | Trnau1ap | Tubb2c  |
| Tmem149  | Tmem87b   | Tpm3     | Trnp1    | Tubb3   |
| Tmem150b | Tmem88    | Tpr      | Trp53rk  | Tubb5   |
| Tmem161b | Tmem9     | Tpra1    | Trp73    | Tubg2   |
| Tmem165  | Tmem91    | Tprgl    | Trpt1    | Tusc1   |
| Tmem17   | Tmem93    | Tprn     | Tsc22d1  | Tusc2   |
| Tmem176b | Tmem98    | Tpsg1    | Tsc22d4  | Twf1    |
| Tmem178  | Tmem9b    | Tpst1    | Tsen2    | Twistnb |
| Tmem179  | Tmie      | Tpt1     | Tsen34   | Txndc12 |
| Tmem194  | Tmod1     | Traip    | Tsg101   | Txndc15 |
| Tmem20   | Tmsb10    | Tram1    | Tsn      | Txndc17 |
| Tmem205  | Tmsb15b2  | Tram111  | Tsnax    | Txndc5  |
| Tmem206  | Tmsb4x    | Trappc1  | Tspan12  | Txndc9  |
| Tmem219  | Tmub1     | Trappc2l | Tspan14  | Txnl1   |
| Tmem222  | Tmx1      | Trappc3  | Tspan17  | Txnl4a  |
| Tmem28   | Tnfaip1   | Trappc4  | Tspan31  | Txnl4b  |
| Tmem35   | Tnfaip8l3 | Trappc5  | Tspan33  | Tyms    |
| Tmem38a  | Tnfrsf10b | Trappc6b | Tspan7   | U2af1   |
| Tmem38b  | Tnfrsf8   | Trem2    | Tspyl1   | U2af1l4 |
| Tmem41a  | Tnk1      | Trex1    | Tsr1     | U2af2   |
| Tmem50a  | Tnnc1     | Trh      | Tssc1    | Uap1l1  |
| Tmem54   | Tnni1     | Trib1    | Tssc4    | Uba2    |
| Tmem55a  | Tnni3     | Trim11   | Tsta3    | Uba3    |
| Tmem55b  | Tnnt1     | Trim13   | Tstd2    | Uba5    |
| Tmem59   | Tob1      | Trim27   | Ttc12    | Uba52   |
| Tmem59l  | Tom1      | Trim8    | Ttc4     | Ubac1   |
| Tmem66   | Top1      | Trip6    | Ttc9b    | Ubac2   |
| Tmem68   | Tor1aip2  | Trmt11   | Ttll1    | Ubb     |
| Tmem8    | Tpd52     | Trmt112  | Tuba1a   | Ubc     |
| Tmem80   | Tpd52l1   | Trmt12   | Tuba1b   | Ube1y1  |
| Tmem85   | Tpd52l2   | Trmt6    | Tuba1c   | Ube2cbp |
| Tmem86a  | Tpi1      | Trmt61b  | Tuba4a   | Ube2d2  |

|         |         |        |         |         |
|---------|---------|--------|---------|---------|
| Ube2e3  | Unc93b1 | Vps37b | Wnt2    | Zcchc18 |
| Ube2f   | Upf3a   | Vps37d | Wnt4    | Zcchc7  |
| Ube2g2  | Upf3b   | Vps45  | Wrb     | Zcchc9  |
| Ube2i   | Urm1    | Vps4a  | Wsb2    | Zcrb1   |
| Ube2j2  | Use1    | Vps53  | Wtap    | Zcwpw1  |
| Ube2k   | Usf2    | Vps72  | Xrcc4   | Zdhhc13 |
| Ube2l3  | Usp12   | Vta1   | Xrcc5   | Zdhhc16 |
| Ube2m   | Usp39   | Vti1b  | Xrn2    | Zdhhc20 |
| Ube2q1  | Usp50   | Wbp1   | Xylb    | Zdhhc21 |
| Ube2q11 | Usp7    | Wbp2   | Yars    | Zdhhc4  |
| Ube2r2  | Utp11l  | Wbp4   | Ybx1    | Zdhhc6  |
| Ube2s   | Utp18   | Wbp5   | Ydjc    | Zfand1  |
| Ube2v1  | Utp23   | Wdr1   | Yeats4  | Zfand2b |
| Ube2w   | Utp3    | Wdr18  | Yipf2   | Zfand6  |
| Ube2z   | Utp6    | Wdr25  | Yipf3   | Zfp101  |
| Ubl3    | Vamp2   | Wdr31  | Yipf4   | Zfp119a |
| Ubl4    | Vamp4   | Wdr38  | Ypel4   | Zfp120  |
| Ubl5    | Vapa    | Wdr45l | Ypel5   | Zfp2    |
| Ublcp1  | Vat1    | Wdr5   | Ythdc1  | Zfp235  |
| Ubqln4  | Vbp1    | Wdr53  | Ythdc2  | Zfp259  |
| Ubt2    | Vcp     | Wdr54  | Ywhab   | Zfp277  |
| Ubt     | Vegfb   | Wdr55  | Ywhah   | Zfp280d |
| Ubxn1   | Veph1   | Wdr61  | Ywhaq   | Zfp286  |
| Ubxn11  | Vill    | Wdr70  | Zbtb11  | Zfp30   |
| Uchl1   | Vipar   | Wdr74  | Zbtb22  | Zfp300  |
| Ucn3    | Vmn1r58 | Wdr8   | Zbtb8os | Zfp322a |
| Ufc1    | Vmp1    | Wdr83  | Zc3h13  | Zfp35   |
| Ufd1l   | Vopp1   | Wdr89  | Zc3h15  | Zfp352  |
| Ugdh    | Vps11   | Wdyhv1 | Zc3h7a  | Zfp353  |
| Uhrf2   | Vps24   | Whamm  | Zc3h8   | Zfp354a |
| Ulk4    | Vps28   | Wibg   | Zc3hc1  | Zfp358  |
| Unc50   | Vps29   | Wnk4   | Zcchc12 | Zfp365  |

|           |         |
|-----------|---------|
| Zfp385c   | Zfp830  |
| Zfp40     | Zfp839  |
| Zfp410    | Zfp868  |
| Zfp414    | Zfp90   |
| Zfp426    | Zfp91   |
| Zfp449    | Zfp932  |
| Zfp454    | Zfp937  |
| Zfp457    | Zfp938  |
| Zfp488    | Zfp946  |
| Zfp512    | Zfp947  |
| Zfp513    | Zfp952  |
| Zfp524    | Zfp958  |
| Zfp566    | Zfp959  |
| Zfp579    | Zfp1    |
| Zfp58     | Zfyve21 |
| Zfp593    | Zglp1   |
| Zfp617    | Zic4    |
| Zfp622    | Zmat1   |
| Zfp639    | Zmat2   |
| Zfp655    | Znhit1  |
| Zfp688    | Znhit3  |
| Zfp691    | Zranb1  |
| Zfp703    | Zranb2  |
| Zfp706    | Zrsr1   |
| Zfp707    | Zrsr2   |
| Zfp71-rs1 | Zscan21 |
| Zfp747    | Zscan29 |
| Zfp760    | Zswim7  |
| Zfp768    | Zw10    |
| Zfp772    | Zwint   |
| Zfp784    |         |
| Zfp821    |         |
