# Supplementary material
Source: PubMed Central journal article supplement (PMC3553295)
Supplement: NIHMS416112-supplement-Supp_TableS3.pdf [file NIHMS416112-supplement-Supp_TableS3.pdf]

| <b>PANTHER Pathway</b>                                           | Mus musculus genes (26,185) | NAc sustained increase, Coc & Wit (1,387) | NAc sustained increase, Coc & Wit (P-value) | NAc increase, Wit only (1,001) | NAc increase, Wit only (P-value) | NAc sustained decrease, Coc & Wit (2,670) | NAc sustained decrease, Coc & Wit (P-value) |
|------------------------------------------------------------------|-----------------------------|-------------------------------------------|---------------------------------------------|--------------------------------|----------------------------------|-------------------------------------------|---------------------------------------------|
| Cadherin signaling pathway                                       | 167                         | 19                                        | 1.94E-03                                    | 16                             | 9.25E-04                         | 30                                        | 2.70E-03                                    |
| Heterotrimeric G-protein signaling pathway-Gi alpha and Gs alpha | 169                         | 19                                        | 2.21E-03                                    | 18                             | 1.32E-04                         | 32                                        | 8.89E-04                                    |
| Wnt signaling pathway                                            | 348                         | 46                                        | 3.67E-08                                    | 27                             | 5.77E-04                         | 64                                        | 9.02E-06                                    |
| Angiogenesis                                                     | 193                         | 30                                        | 3.42E-07                                    | 17                             | 1.58E-03                         | 21                                        | 4.12E-01                                    |
| Endothelin signaling pathway                                     | 89                          | 17                                        | 9.04E-06                                    | 11                             | 7.93E-04                         | 9                                         | 5.78E-01                                    |
| Heterotrimeric G-protein signaling pathway-Gq alpha and Go alpha | 139                         | 16                                        | 3.78E-03                                    | 15                             | 4.05E-04                         | 21                                        | 5.26E-02                                    |
| PDGF signaling pathway                                           | 162                         | 20                                        | 5.73E-04                                    | 20                             | 7.43E-06                         | 16                                        | 5.14E-01                                    |
| Alzheimer disease-presenilin pathway                             | 124                         | 21                                        | 5.31E-06                                    | 10                             | 2.31E-02                         | 16                                        | 2.05E-01                                    |
| Axon guidance mediated by netrin                                 | 29                          | 6                                         | 4.96E-03                                    | 4                              | 2.63E-02                         | 4                                         | 3.43E-01                                    |
| Axon guidance mediated by semaphorins                            | 44                          | 9                                         | 6.94E-04                                    | 2                              | 5.01E-01                         | 7                                         | 1.67E-01                                    |
| Insulin/IGF pathway-protein kinase B signaling cascade           | 83                          | 15                                        | 5.50E-05                                    | 6                              | 1.02E-01                         | 7                                         | 3.90E-01                                    |
| Ionotropic glutamate receptor pathway                            | 56                          | 13                                        | 1.39E-05                                    | 3                              | 3.61E-01                         | 8                                         | 2.17E-01                                    |
| Metabotropic glutamate receptor group III pathway                | 77                          | 13                                        | 3.20E-04                                    | 4                              | 3.40E-01                         | 15                                        | 1.47E-02                                    |
| Nicotinic acetylcholine receptor signaling pathway               | 98                          | 12                                        | 7.11E-03                                    | 6                              | 1.76E-01                         | 7                                         | 2.20E-01                                    |
| Tryptophan biosynthesis                                          | 0                           | 1                                         | 0.00E+00                                    | 0                              | 1.00E+00                         | 0                                         | 1.00E+00                                    |
| Chorismate biosynthesis                                          | 0                           | 0                                         | 1.00E+00                                    | 1                              | 0.00E+00                         | 0                                         | 1.00E+00                                    |
| EGF receptor signaling pathway                                   | 138                         | 9                                         | 3.12E-01                                    | 18                             | 1.02E-05                         | 21                                        | 4.95E-02                                    |
| Histamine H1 receptor mediated signaling pathway                 | 53                          | 5                                         | 1.53E-01                                    | 7                              | 4.81E-03                         | 10                                        | 4.88E-02                                    |
| Inflammation mediated by chemokine and cytokine signaling path   | 298                         | 20                                        | 1.72E-01                                    | 25                             | 3.01E-04                         | 34                                        | 2.78E-01                                    |
| Integrin signalling pathway                                      | 185                         | 13                                        | 1.89E-01                                    | 24                             | 4.04E-07                         | 25                                        | 1.00E-01                                    |
| JAK/STAT signaling pathway                                       | 20                          | 0                                         | 3.47E-01                                    | 4                              | 7.76E-03                         | 2                                         | 6.66E-01                                    |
| Muscarinic acetylcholine receptor 1 and 3 signaling pathway      | 69                          | 9                                         | 1.26E-02                                    | 10                             | 4.09E-04                         | 13                                        | 2.78E-02                                    |
| Unclassified                                                     | 23373                       | 1226                                      | 1.58E-01                                    | 862                            | 1.11E-03                         | 2357                                      | 5.50E-02                                    |
| VEGF signaling pathway                                           | 76                          | 9                                         | 2.20E-02                                    | 8                              | 9.87E-03                         | 7                                         | 4.88E-01                                    |
| 5HT1 type receptor mediated signaling pathway                    | 48                          | 2                                         | 5.33E-01                                    | 3                              | 2.79E-01                         | 13                                        | 1.66E-03                                    |
| 5HT4 type receptor mediated signaling pathway                    | 38                          | 1                                         | 4.02E-01                                    | 5                              | 1.64E-02                         | 10                                        | 6.56E-03                                    |
| Anandamide_degradation                                           | 1                           | 0                                         | 9.48E-01                                    | 0                              | 9.62E-01                         | 2                                         | 4.86E-03                                    |
| Beta3 adrenergic receptor signaling pathway                      | 33                          | 0                                         | 1.74E-01                                    | 4                              | 3.92E-02                         | 9                                         | 7.75E-03                                    |
| Cell cycle                                                       | 24                          | 2                                         | 3.63E-01                                    | 1                              | 6.01E-01                         | 14                                        | 3.19E-07                                    |
| Corticotropin releasing factor receptor signaling pathway        | 37                          | 0                                         | 1.41E-01                                    | 3                              | 1.70E-01                         | 10                                        | 5.49E-03                                    |
| DNA replication                                                  | 25                          | 2                                         | 3.82E-01                                    | 0                              | 3.84E-01                         | 9                                         | 1.29E-03                                    |
| FGF signaling pathway                                            | 125                         | 9                                         | 2.23E-01                                    | 9                              | 5.42E-02                         | 24                                        | 3.06E-03                                    |
| General transcription regulation                                 | 40                          | 0                                         | 1.20E-01                                    | 3                              | 1.98E-01                         | 14                                        | 9.17E-05                                    |
| Heterotrimeric G-protein signaling pathway-rod outer segment pho | 49                          | 0                                         | 7.44E-02                                    | 3                              | 2.89E-01                         | 13                                        | 1.98E-03                                    |
| Histamine H2 receptor mediated signaling pathway                 | 28                          | 0                                         | 2.27E-01                                    | 4                              | 2.35E-02                         | 8                                         | 9.03E-03                                    |
| Huntington disease                                               | 199                         | 14                                        | 1.77E-01                                    | 14                             | 2.35E-02                         | 35                                        | 1.80E-03                                    |
| Metabotropic glutamate receptor group II pathway                 | 55                          | 5                                         | 1.70E-01                                    | 2                              | 6.49E-01                         | 15                                        | 7.15E-04                                    |

|                                                             |     |   |          |   |          |    |          |
|-------------------------------------------------------------|-----|---|----------|---|----------|----|----------|
| mRNA splicing                                               | 14  | 1 | 5.24E-01 | 0 | 5.85E-01 | 9  | 1.88E-05 |
| Muscarinic acetylcholine receptor 2 and 4 signaling pathway | 67  | 2 | 3.12E-01 | 3 | 4.72E-01 | 16 | 1.87E-03 |
| p53 pathway                                                 | 127 | 9 | 2.36E-01 | 5 | 5.34E-01 | 27 | 4.11E-04 |
| p53 pathway by glucose deprivation                          | 27  | 2 | 4.19E-01 | 0 | 3.56E-01 | 8  | 7.36E-03 |
| Parkinson disease                                           | 106 | 4 | 3.39E-01 | 5 | 3.81E-01 | 30 | 1.12E-06 |
| Transcription regulation by bZIP transcription factor       | 58  | 3 | 6.31E-01 | 4 | 1.84E-01 | 19 | 1.41E-05 |
| Ubiquitin proteasome pathway                                | 88  | 3 | 3.15E-01 | 5 | 2.49E-01 | 38 | 4.38E-13 |
| Vasopressin synthesis                                       | 13  | 0 | 5.02E-01 | 1 | 3.92E-01 | 7  | 4.50E-04 |
| 2-arachidonoylglycerol biosynthesis                         | 6   | 1 | 2.72E-01 | 0 | 7.95E-01 | 1  | 4.58E-01 |
| 5-Hydroxytryptamine biosynthesis                            | 6   | 0 | 7.28E-01 | 0 | 7.95E-01 | 2  | 1.26E-01 |
| 5-Hydroxytryptamine degradation                             | 23  | 0 | 2.96E-01 | 0 | 4.15E-01 | 0  | 9.57E-02 |
| 5HT2 type receptor mediated signaling pathway               | 77  | 8 | 5.57E-02 | 6 | 7.80E-02 | 13 | 5.66E-02 |
| 5HT3 type receptor mediated signaling pathway               | 17  | 1 | 5.94E-01 | 0 | 5.22E-01 | 4  | 9.82E-02 |
| Acetate utilization                                         | 3   | 1 | 1.47E-01 | 0 | 8.92E-01 | 0  | 7.36E-01 |
| Adenine and hypoxanthine salvage pathway                    | 13  | 2 | 1.52E-01 | 0 | 6.08E-01 | 1  | 6.18E-01 |
| Adrenaline and noradrenaline biosynthesis                   | 35  | 1 | 4.47E-01 | 0 | 2.62E-01 | 6  | 1.51E-01 |
| Alanine biosynthesis                                        | 2   | 0 | 8.99E-01 | 0 | 9.26E-01 | 0  | 8.16E-01 |
| Allantoin degradation                                       | 1   | 0 | 9.48E-01 | 0 | 9.62E-01 | 0  | 9.03E-01 |
| Alpha adrenergic receptor signaling pathway                 | 34  | 5 | 3.64E-02 | 2 | 3.73E-01 | 5  | 2.68E-01 |
| Alzheimer disease-amyloid secretase pathway                 | 73  | 9 | 1.75E-02 | 5 | 1.51E-01 | 6  | 3.86E-01 |
| Aminobutyrate degradation                                   | 2   | 0 | 8.99E-01 | 0 | 9.26E-01 | 0  | 8.16E-01 |
| Androgen/estrogene/progesterone biosynthesis                | 28  | 0 | 2.27E-01 | 0 | 3.43E-01 | 0  | 5.75E-02 |
| Apoptosis signaling pathway                                 | 141 | 7 | 5.29E-01 | 8 | 1.77E-01 | 17 | 2.77E-01 |
| Arginine biosynthesis                                       | 8   | 0 | 6.55E-01 | 1 | 2.64E-01 | 0  | 4.42E-01 |
| Ascorbate degradation                                       | 5   | 1 | 2.33E-01 | 0 | 8.26E-01 | 3  | 1.51E-02 |
| Asparagine and aspartate biosynthesis                       | 5   | 0 | 7.67E-01 | 0 | 8.26E-01 | 1  | 3.99E-01 |
| ATP synthesis                                               | 11  | 0 | 5.58E-01 | 0 | 6.57E-01 | 0  | 3.26E-01 |
| Axon guidance mediated by Slit/Robo                         | 21  | 3 | 1.02E-01 | 1 | 5.52E-01 | 3  | 3.62E-01 |
| B cell activation                                           | 87  | 6 | 3.16E-01 | 8 | 2.04E-02 | 15 | 3.72E-02 |
| Beta1 adrenergic receptor signaling pathway                 | 49  | 3 | 4.81E-01 | 5 | 4.18E-02 | 10 | 3.16E-02 |
| Beta2 adrenergic receptor signaling pathway                 | 49  | 4 | 2.63E-01 | 5 | 4.18E-02 | 10 | 3.16E-02 |
| Blood coagulation                                           | 55  | 0 | 5.41E-02 | 4 | 1.62E-01 | 3  | 1.89E-01 |
| Bupropion degradation                                       | 5   | 0 | 7.67E-01 | 0 | 8.26E-01 | 0  | 6.01E-01 |
| Carnitine and CoA metabolism                                | 2   | 0 | 8.99E-01 | 0 | 9.26E-01 | 0  | 8.16E-01 |
| Carnitine metabolism                                        | 2   | 0 | 8.99E-01 | 0 | 9.26E-01 | 0  | 8.16E-01 |
| Cholesterol biosynthesis                                    | 14  | 0 | 4.76E-01 | 0 | 5.85E-01 | 4  | 5.68E-02 |
| Circadian clock system                                      | 9   | 0 | 6.21E-01 | 2 | 4.72E-02 | 2  | 2.34E-01 |
| Cobalamin biosynthesis                                      | 1   | 0 | 9.48E-01 | 0 | 9.62E-01 | 0  | 9.03E-01 |
| Coenzyme A biosynthesis                                     | 6   | 1 | 2.72E-01 | 1 | 2.05E-01 | 1  | 4.58E-01 |
| Cysteine biosynthesis                                       | 1   | 0 | 9.48E-01 | 0 | 9.62E-01 | 1  | 9.69E-02 |
| Cytoskeletal regulation by Rho GTPase                       | 101 | 8 | 1.72E-01 | 7 | 9.63E-02 | 18 | 1.83E-02 |
| De novo purine biosynthesis                                 | 39  | 1 | 3.88E-01 | 1 | 5.61E-01 | 7  | 1.08E-01 |

|                                                                 |     |    |          |    |          |    |          |
|-----------------------------------------------------------------|-----|----|----------|----|----------|----|----------|
| De novo pyrimidine deoxyribonucleotide biosynthesis             | 23  | 1  | 6.56E-01 | 1  | 5.85E-01 | 2  | 5.84E-01 |
| De novo pyrimidine ribonucleotides biosynthesis                 | 21  | 1  | 6.94E-01 | 1  | 5.52E-01 | 2  | 6.38E-01 |
| Endogenous_cannabinoid_signaling                                | 29  | 2  | 4.54E-01 | 2  | 3.04E-01 | 8  | 1.10E-02 |
| FAS signaling pathway                                           | 38  | 2  | 6.73E-01 | 3  | 1.79E-01 | 4  | 5.42E-01 |
| Flavin biosynthesis                                             | 1   | 0  | 9.48E-01 | 0  | 9.62E-01 | 0  | 9.03E-01 |
| Folate biosynthesis                                             | 5   | 0  | 7.67E-01 | 0  | 8.26E-01 | 3  | 1.51E-02 |
| Formyltetrahydroformate biosynthesis                            | 10  | 1  | 4.11E-01 | 0  | 6.82E-01 | 2  | 2.71E-01 |
| Fructose galactose metabolism                                   | 14  | 0  | 4.76E-01 | 0  | 5.85E-01 | 3  | 1.73E-01 |
| GABA-B_receptor_II_signaling                                    | 43  | 6  | 2.87E-02 | 4  | 8.48E-02 | 9  | 3.50E-02 |
| Gamma-aminobutyric acid synthesis                               | 6   | 1  | 2.72E-01 | 1  | 2.05E-01 | 0  | 5.42E-01 |
| General transcription by RNA polymerase I                       | 18  | 1  | 6.15E-01 | 1  | 4.98E-01 | 6  | 1.13E-02 |
| Glutamine glutamate conversion                                  | 5   | 0  | 7.67E-01 | 1  | 1.74E-01 | 0  | 6.01E-01 |
| Glycolysis                                                      | 60  | 0  | 4.15E-02 | 0  | 1.01E-01 | 8  | 2.72E-01 |
| Hedgehog signaling pathway                                      | 25  | 2  | 3.82E-01 | 3  | 7.22E-02 | 5  | 1.15E-01 |
| Heme biosynthesis                                               | 14  | 0  | 4.76E-01 | 0  | 5.85E-01 | 2  | 4.18E-01 |
| Histamine synthesis                                             | 2   | 0  | 8.99E-01 | 0  | 9.26E-01 | 1  | 1.84E-01 |
| Hypoxia response via HIF activation                             | 28  | 4  | 6.34E-02 | 3  | 9.36E-02 | 5  | 1.61E-01 |
| Insulin/IGF pathway-mitogen activated protein kinase kinase/MAF | 36  | 6  | 1.34E-02 | 1  | 6.00E-01 | 4  | 5.00E-01 |
| Interferon-gamma signaling pathway                              | 30  | 1  | 5.28E-01 | 3  | 1.09E-01 | 4  | 3.66E-01 |
| Interleukin signaling pathway                                   | 160 | 15 | 2.64E-02 | 11 | 4.71E-02 | 11 | 1.11E-01 |
| Isoleucine biosynthesis                                         | 3   | 1  | 1.47E-01 | 0  | 8.92E-01 | 1  | 2.64E-01 |
| Leucine biosynthesis                                            | 2   | 0  | 8.99E-01 | 0  | 9.26E-01 | 0  | 8.16E-01 |
| Lipoate_biosynthesis                                            | 2   | 0  | 8.99E-01 | 0  | 9.26E-01 | 0  | 8.16E-01 |
| Lysine biosynthesis                                             | 2   | 1  | 1.01E-01 | 0  | 9.26E-01 | 0  | 8.16E-01 |
| Mannose metabolism                                              | 8   | 0  | 6.55E-01 | 1  | 2.64E-01 | 2  | 1.97E-01 |
| Metabotropic glutamate receptor group I pathway                 | 35  | 5  | 4.03E-02 | 3  | 1.52E-01 | 5  | 2.88E-01 |
| Methionine biosynthesis                                         | 1   | 1  | 5.16E-02 | 0  | 9.62E-01 | 0  | 9.03E-01 |
| Methylcitrate cycle                                             | 4   | 0  | 8.09E-01 | 0  | 8.58E-01 | 0  | 6.65E-01 |
| Methylmalonyl pathway                                           | 5   | 0  | 7.67E-01 | 0  | 8.26E-01 | 0  | 6.01E-01 |
| N-acetylglucosamine metabolism                                  | 8   | 2  | 6.80E-02 | 0  | 7.36E-01 | 2  | 1.97E-01 |
| Notch signaling pathway                                         | 49  | 7  | 1.69E-02 | 6  | 1.23E-02 | 9  | 6.77E-02 |
| O-antigen biosynthesis                                          | 4   | 1  | 1.91E-01 | 0  | 8.58E-01 | 2  | 6.37E-02 |
| Ornithine degradation                                           | 3   | 0  | 8.53E-01 | 0  | 8.92E-01 | 1  | 2.64E-01 |
| Oxidative stress response                                       | 62  | 6  | 1.15E-01 | 7  | 1.08E-02 | 6  | 5.55E-01 |
| Oxytocin receptor mediated signaling pathway                    | 68  | 6  | 1.56E-01 | 6  | 4.88E-02 | 11 | 9.36E-02 |
| P53 pathway feedback loops 1                                    | 8   | 1  | 3.45E-01 | 0  | 7.36E-01 | 2  | 1.97E-01 |
| p53 pathway feedback loops 2                                    | 51  | 5  | 1.37E-01 | 4  | 1.34E-01 | 10 | 3.95E-02 |
| Pentose phosphate pathway                                       | 8   | 0  | 6.55E-01 | 0  | 7.36E-01 | 3  | 4.97E-02 |
| Phenylalanine biosynthesis                                      | 3   | 0  | 8.53E-01 | 0  | 8.92E-01 | 1  | 2.64E-01 |
| Phenylethylamine degradation                                    | 14  | 0  | 4.76E-01 | 1  | 4.15E-01 | 0  | 2.40E-01 |
| PI3 kinase pathway                                              | 110 | 10 | 7.21E-02 | 7  | 1.33E-01 | 19 | 2.08E-02 |
| Plasminogen activating cascade                                  | 18  | 0  | 3.85E-01 | 2  | 1.52E-01 | 1  | 4.52E-01 |

|                                                          |     |    |          |    |          |    |          |
|----------------------------------------------------------|-----|----|----------|----|----------|----|----------|
| PLP biosynthesis                                         | 2   | 0  | 8.99E-01 | 0  | 9.26E-01 | 2  | 1.82E-02 |
| Proline biosynthesis                                     | 4   | 0  | 8.09E-01 | 0  | 8.58E-01 | 1  | 3.35E-01 |
| Purine metabolism                                        | 9   | 1  | 3.79E-01 | 1  | 2.91E-01 | 2  | 2.34E-01 |
| Pyridoxal phosphate salvage pathway                      | 2   | 1  | 1.01E-01 | 0  | 9.26E-01 | 1  | 1.84E-01 |
| Pyrimidine Metabolism                                    | 15  | 0  | 4.52E-01 | 0  | 5.64E-01 | 2  | 4.52E-01 |
| Pyruvate metabolism                                      | 15  | 0  | 4.52E-01 | 0  | 5.64E-01 | 1  | 5.48E-01 |
| Ras Pathway                                              | 80  | 10 | 1.16E-02 | 8  | 1.31E-02 | 14 | 3.88E-02 |
| S adenosyl methionine biosynthesis                       | 3   | 1  | 1.47E-01 | 0  | 8.92E-01 | 0  | 7.36E-01 |
| Salvage pyrimidine deoxyribonucleotides                  | 5   | 0  | 7.67E-01 | 1  | 1.74E-01 | 0  | 6.01E-01 |
| Salvage pyrimidine ribonucleotides                       | 15  | 1  | 5.48E-01 | 2  | 1.13E-01 | 1  | 5.48E-01 |
| Serine glycine biosynthesis                              | 6   | 0  | 7.28E-01 | 0  | 7.95E-01 | 2  | 1.26E-01 |
| Succinate to proprionate conversion                      | 2   | 0  | 8.99E-01 | 0  | 9.26E-01 | 0  | 8.16E-01 |
| Sulfate assimilation                                     | 2   | 0  | 8.99E-01 | 0  | 9.26E-01 | 0  | 8.16E-01 |
| Synaptic_vesicle_trafficking                             | 41  | 3  | 3.70E-01 | 2  | 4.65E-01 | 8  | 6.25E-02 |
| T cell activation                                        | 142 | 9  | 3.41E-01 | 11 | 2.29E-02 | 22 | 3.87E-02 |
| TCA cycle                                                | 18  | 1  | 6.15E-01 | 0  | 5.02E-01 | 0  | 1.59E-01 |
| TGF-beta signaling pathway                               | 143 | 11 | 1.44E-01 | 10 | 5.16E-02 | 17 | 2.96E-01 |
| Thiamine metabolism                                      | 2   | 1  | 1.01E-01 | 0  | 9.26E-01 | 0  | 8.16E-01 |
| Threonine biosynthesis                                   | 2   | 1  | 1.01E-01 | 0  | 9.26E-01 | 1  | 1.84E-01 |
| Thyrotropin-releasing hormone receptor signaling pathway | 71  | 6  | 1.78E-01 | 7  | 2.09E-02 | 12 | 6.47E-02 |
| Toll receptor signaling pathway                          | 64  | 3  | 5.60E-01 | 1  | 2.98E-01 | 7  | 4.78E-01 |
| Triacylglycerol metabolism                               | 1   | 0  | 9.48E-01 | 0  | 9.62E-01 | 0  | 9.03E-01 |
| Tyrosine biosynthesis                                    | 4   | 0  | 8.09E-01 | 0  | 8.58E-01 | 1  | 3.35E-01 |
| Valine biosynthesis                                      | 3   | 0  | 8.53E-01 | 0  | 8.92E-01 | 1  | 2.64E-01 |
| Vitamin B6 metabolism                                    | 3   | 1  | 1.47E-01 | 0  | 8.92E-01 | 2  | 3.82E-02 |
| Vitamin D metabolism and pathway                         | 13  | 0  | 5.02E-01 | 1  | 3.92E-01 | 1  | 6.18E-01 |
| Xanthine and guanine salvage pathway                     | 6   | 0  | 7.28E-01 | 0  | 7.95E-01 | 1  | 4.58E-01 |

| (i) NAC sustained increase, Coc & Wit |             |                                     |            |                                                                                                                      |                                                                                                                                                                                                                                                                                                     |                       |                            |                                                                                                                                                                                                                                                                                                                                                                                                                                                                                       |
|---------------------------------------|-------------|-------------------------------------|------------|----------------------------------------------------------------------------------------------------------------------|-----------------------------------------------------------------------------------------------------------------------------------------------------------------------------------------------------------------------------------------------------------------------------------------------------|-----------------------|----------------------------|---------------------------------------------------------------------------------------------------------------------------------------------------------------------------------------------------------------------------------------------------------------------------------------------------------------------------------------------------------------------------------------------------------------------------------------------------------------------------------------|
| Gene ID                               | Gene symbol | Gene name                           | Protein ID | GO Mol Function                                                                                                      | GO Biological Process                                                                                                                                                                                                                                                                               | GO Cellular Component | Panther Protein Class      | Pathway                                                                                                                                                                                                                                                                                                                                                                                                                                                                               |
| MOUSE MG 1098280 UniProt KB=P45481    | Crebbp      | CREB-binding protein;Crebbp         | P45481     | acyltransferase activity;DNA binding;chromatin binding;transcription factor activity;transcription cofactor activity | nucleobase, nucleoside, nucleotide and nucleic acid metabolic process                                                                                                                                                                                                                               |                       | acetyl-transferase         | p53 pathway->P300;;Transcription regulation by bZIP transcription factor->CBP/P300;;Hedgehog signaling pathway->CBP;;Huntington disease->CREB binding protein;;Hypoxia response via HIF activation->p300;;Wnt signaling pathway->CREB binding protein;;TGF-beta signaling pathway->Co-activators or corepressors;;Heterotrimeric G-protein signaling pathway-Gi alpha and Gs alpha mediated pathway->cAMP responding element-binding protein;;p53 pathway->CREB binding protein;;;;;; |
| MOUSE MG 99677 UniProt KB=O88444      | Adcy1       | Adenylate cyclase type 1;Adcy1      | O88444     | adenylate cyclase activity;guanylate cyclase activity                                                                | nucleobase, nucleoside, nucleotide and nucleic acid metabolic process                                                                                                                                                                                                                               |                       | adenylate cyclase          | Endothelin signaling pathway->3',5'-cyclic AMP synthetase;;GABA-B_receptor_II_signaling->Adenylate cyclase;;Heterotrimeric G-protein signaling pathway-Gi alpha and Gs alpha mediated pathway->Adenylyl cyclase;;;                                                                                                                                                                                                                                                                    |
| MOUSE MG 99674 UniProt KB=Q91WF3      | Adcy4       | Adenylate cyclase type 4;Adcy4      | Q91WF3     | adenylate cyclase activity;guanylate cyclase activity                                                                | nucleobase, nucleoside, nucleotide and nucleic acid metabolic process                                                                                                                                                                                                                               |                       | adenylate cyclase          | Endothelin signaling pathway->3',5'-cyclic AMP synthetase;;GABA-B_receptor_II_signaling->Adenylate cyclase;;Heterotrimeric G-protein signaling pathway-Gi alpha and Gs alpha mediated pathway->Adenylyl cyclase;;;                                                                                                                                                                                                                                                                    |
| MOUSE MG 87917 UniProt KB=Q01341      | Adcy6       | Adenylate cyclase type 6;Adcy6      | Q01341     | adenylate cyclase activity;guanylate cyclase activity                                                                | nucleobase, nucleoside, nucleotide and nucleic acid metabolic process                                                                                                                                                                                                                               |                       | adenylate cyclase          | Endothelin signaling pathway->3',5'-cyclic AMP synthetase;;Inflammation mediated by chemokine and cytokine signaling pathway->Adenylyl cyclase;;GABA-B_receptor_II_signaling->Adenylate cyclase;;Heterotrimeric G-protein signaling pathway-Gi alpha and Gs alpha mediated pathway->Adenylyl cyclase;;;                                                                                                                                                                               |
| MOUSE MG 108450 UniProt KB=P51830     | Adcy9       | Adenylate cyclase type 9;Adcy9      | P51830     | adenylate cyclase activity;guanylate cyclase activity                                                                | nucleobase, nucleoside, nucleotide and nucleic acid metabolic process                                                                                                                                                                                                                               |                       | adenylate cyclase          | Endothelin signaling pathway->3',5'-cyclic AMP synthetase;;GABA-B_receptor_II_signaling->Adenylate cyclase;;Heterotrimeric G-protein signaling pathway-Gi alpha and Gs alpha mediated pathway->Adenylyl cyclase;;;                                                                                                                                                                                                                                                                    |
| MOUSE MG 106673 UniProt KB=P97714     | Adra1a      | Alpha-1D adrenergic receptor;Adra1d | P97714     | G-protein coupled receptor activity                                                                                  | muscle contraction;blood circulation;neurological system process;apoptosis;cell surface receptor linked signal transduction;cell motion;signal transduction                                                                                                                                         |                       | G-protein coupled receptor | Heterotrimeric G-protein signaling pathway-Gi alpha and Gs alpha mediated pathway->Gi protein coupled receptor;;Alpha adrenergic receptor signaling pathway->Alpha1A/1B/1C;;;                                                                                                                                                                                                                                                                                                         |
| MOUSE MG 104773 UniProt KB=P97718     | Adra1a      | Alpha-1A adrenergic receptor;Adra1a | P97718     | G-protein coupled receptor activity                                                                                  | muscle contraction;blood circulation;neurological system process;apoptosis;cell surface receptor linked signal transduction;cell motion;signal transduction                                                                                                                                         |                       | G-protein coupled receptor | Heterotrimeric G-protein signaling pathway-Gi alpha and Gs alpha mediated pathway->Gi protein coupled receptor;;Alpha adrenergic receptor signaling pathway->Alpha1A/1B/1C;;;                                                                                                                                                                                                                                                                                                         |
| MOUSE MG 87938 UniProt KB=P18762      | Adrb2       | Beta-2 adrenergic receptor;Adrb2    | P18762     | G-protein coupled receptor activity                                                                                  | muscle contraction;blood circulation;neurological system process;lysosomal transport;intracellular protein transport;endocytosis;apoptosis;cell surface receptor linked signal transduction;intracellular signaling cascade;cell-cell signaling;cell motion;signal transduction;cell-cell signaling |                       | G-protein coupled receptor | Beta2 adrenergic receptor signaling pathway->Beta2;;Heterotrimeric G-protein signaling pathway-Gi alpha and Gs alpha mediated pathway->Gs-protein coupled receptor;;;                                                                                                                                                                                                                                                                                                                 |

|                                    |       |                                        |        |                                     |                                                                                                                                                                   |  |                            |                                                                                                                                                                                                                                                                                                                                                                                                                                                                                                                                                                                        |          |
|------------------------------------|-------|----------------------------------------|--------|-------------------------------------|-------------------------------------------------------------------------------------------------------------------------------------------------------------------|--|----------------------------|----------------------------------------------------------------------------------------------------------------------------------------------------------------------------------------------------------------------------------------------------------------------------------------------------------------------------------------------------------------------------------------------------------------------------------------------------------------------------------------------------------------------------------------------------------------------------------------|----------|
| MOUSE MG 1333877 UniProt KB=O88495 | Gpr50 | Melatonin-related receptor;Gpr50       | O88495 | G-protein coupled receptor activity | immune system process;sensory perception;cell surface receptor linked signal transduction;cell-cell signaling;cell motion;signal transduction;cell-cell signaling |  | G-protein coupled receptor | Heterotrimeric G-protein signaling pathway-Gi alpha and Gs alpha mediated pathway->Gi protein coupled receptor;;                                                                                                                                                                                                                                                                                                                                                                                                                                                                       | Gi       |
| MOUSE MG 1351344 UniProt KB=Q9QYS2 | Grm3  | Metabotropic glutamate receptor 3;Grm3 | Q9QYS2 | G-protein coupled receptor activity | neurological system process;cell surface receptor linked signal transduction;signal transduction                                                                  |  | G-protein coupled receptor | Heterotrimeric G-protein signaling pathway-Gi alpha and Gs alpha mediated pathway->Gi protein coupled receptor;;Ionotropic glutamate receptor pathway->Metabotropic Glutamate Receptor 2, Metabotropic Glutamate Receptor 3;;Heterotrimeric G-protein signaling pathway-Gq alpha and Go alpha mediated pathway->Go-protein coupled receptor;;Metabotropic glutamate receptor group II pathway->Metabotropic Glutamate Receptor 2, Metabotropic Glutamate Receptor 3;;Heterotrimeric G-protein signaling pathway-Gq alpha and Go alpha mediated pathway->Gq-protein coupled receptor;;; | Gi/Go/Gq |
| MOUSE MG 1351344 UniProt KB=Q68ED2 | Grm7  | Metabotropic glutamate receptor 7;Grm7 | Q68ED2 | G-protein coupled receptor activity | neurological system process;cell surface receptor linked signal transduction;signal transduction                                                                  |  | G-protein coupled receptor | Heterotrimeric G-protein signaling pathway-Gi alpha and Gs alpha mediated pathway->Gi protein coupled receptor;;Heterotrimeric G-protein signaling pathway-Gq alpha and Go alpha mediated pathway->Go-protein coupled receptor;;Metabotropic glutamate receptor group III pathway->mGluR4/6/7/8;;Heterotrimeric G-protein signaling pathway-Gq alpha and Go alpha mediated pathway->Gq-protein coupled receptor;;;                                                                                                                                                                     | Gi/Go/Gq |
| MOUSE MG 96274 UniProt KB=P28334   | Htr1b | 5-hydroxytryptamine receptor 1B;Htr1b  | P28334 | G-protein coupled receptor activity | neurological system process;cell surface receptor linked signal transduction;cell-cell signaling;signal transduction;cell-cell signaling                          |  | G-protein coupled receptor | Heterotrimeric G-protein signaling pathway-Gi alpha and Gs alpha mediated pathway->Gi protein coupled receptor;;Heterotrimeric G-protein signaling pathway-Gi alpha and Gs alpha mediated pathway->Gs-protein coupled receptor;;5HT1 type receptor mediated signaling pathway->5HT1 Receptor;;;                                                                                                                                                                                                                                                                                        | Gi/Gs    |
| MOUSE MG 96281 UniProt KB=P34968   | Htr2c | 5-hydroxytryptamine receptor 2C;Htr2c  | P34968 | G-protein coupled receptor activity | neurological system process;cell surface receptor linked signal transduction;signal transduction                                                                  |  | G-protein coupled receptor | Heterotrimeric G-protein signaling pathway-Gi alpha and Gs alpha mediated pathway->Gi protein coupled receptor;;Heterotrimeric G-protein signaling pathway-Gi alpha and Gs alpha mediated pathway->Gs-protein coupled receptor;;5HT2 type receptor mediated signaling pathway->5HT2 Receptor;;;                                                                                                                                                                                                                                                                                        | Gi/Gs    |
| MOUSE MG 96283 UniProt KB=P30966   | Htr5a | 5-hydroxytryptamine receptor 5A;Htr5a  | P30966 | G-protein coupled receptor activity | neurological system process;cell surface receptor linked signal transduction;cell-cell signaling;signal transduction;cell-cell signaling                          |  | G-protein coupled receptor | Heterotrimeric G-protein signaling pathway-Gi alpha and Gs alpha mediated pathway->Gi protein coupled receptor;;Heterotrimeric G-protein signaling pathway-Gi alpha and Gs alpha mediated pathway->Gs-protein coupled receptor;;;                                                                                                                                                                                                                                                                                                                                                      | Gi/Gs    |
| MOUSE MG 97439 UniProt KB=P33534   | Oprk1 | Kappa-type opioid receptor;Oprk1       | P33534 | G-protein coupled receptor activity | sensory perception;cell surface receptor linked signal transduction;synaptic transmission;cell motion;signal transduction;cell-cell signaling                     |  | G-protein coupled receptor | Heterotrimeric G-protein signaling pathway-Gi alpha and Gs alpha mediated pathway->Gi protein coupled receptor;;Heterotrimeric G-protein signaling pathway-Gq alpha and Go alpha mediated pathway->Go-protein coupled receptor;;;                                                                                                                                                                                                                                                                                                                                                      | Gi/Go    |
| MOUSE MG 97441 UniProt KB=P42866   | Oprm1 | Mu-type opioid receptor;Oprm1          | P42866 | G-protein coupled receptor activity | sensory perception;cell surface receptor linked signal transduction;synaptic transmission;cell motion;signal transduction;cell-cell signaling                     |  | G-protein coupled receptor | Heterotrimeric G-protein signaling pathway-Gi alpha and Gs alpha mediated pathway->Gi protein coupled receptor;;Heterotrimeric G-protein signaling pathway-Gq alpha and Go alpha mediated pathway->Go-protein coupled receptor;;;                                                                                                                                                                                                                                                                                                                                                      | Gi/Go    |

|                                    |       |                                                                      |        |                                                                     |                                                                                                                                                                                                                                                                                                |                     |                                                                                                                                                                                                                                                                                                                                                                                                                                                                                                                                                                                                                                              |
|------------------------------------|-------|----------------------------------------------------------------------|--------|---------------------------------------------------------------------|------------------------------------------------------------------------------------------------------------------------------------------------------------------------------------------------------------------------------------------------------------------------------------------------|---------------------|----------------------------------------------------------------------------------------------------------------------------------------------------------------------------------------------------------------------------------------------------------------------------------------------------------------------------------------------------------------------------------------------------------------------------------------------------------------------------------------------------------------------------------------------------------------------------------------------------------------------------------------------|
| MOUSE MG 1861437 UniProt KB=Q9WV60 | Gsk3b | Glycogen synthase kinase-3 beta;Gsk3b                                | Q9WV60 | kinase activity                                                     | mitosis;cell surface receptor linked signal transduction;intracellular signaling cascade;carbohydrate metabolic process;protein metabolic process;mitosis;signal transduction;segment specification;ectoderm development;mesoderm development;embryonic development;nervous system development | protein kinase      | Ras Pathway->Glycogen synthase kinase 3;;Heterotrimeric G-protein signaling pathway-Gi alpha and Gs alpha mediated pathway->Glycogen synthase kinase;;PDGF signaling pathway->GSK3;;Angiogenesis->Glycogen Synthase Kinase 3-beta;;Insulin/IGF pathway-protein kinase B signaling cascade->Glycogen synthase kinase 3;;Wnt signaling pathway->Glycogen Synthase Kinase-3Beta;;Alzheimer disease-presenilin pathway->Glycogen synthase kinase 3beta;;Hedgehog signaling pathway->GSK3;;Interleukin signaling pathway->Glycogen synthase kinase 3;;Cadherin signaling pathway->Glycogen synthase kinase 3-beta;;PI3 kinase pathway->GSK3;..... |
| MOUSE MG 99473 UniProt KB=Q8BWG8   | Arrb1 | Beta-arrestin-1;Arrb1                                                | Q8BWG8 | protein binding                                                     | visual perception;sensory perception;intracellular protein transport;endocytosis;cell surface receptor linked signal transduction;signal transduction                                                                                                                                          | enzyme modulator    | Wnt signaling pathway->Beta-Arrestin;;Inflammation mediated by chemokine and cytokine signaling pathway->Arrestin;;Heterotrimeric G-protein signaling pathway-Gi alpha and Gs alpha mediated pathway->Arrestin;;                                                                                                                                                                                                                                                                                                                                                                                                                             |
| MOUSE MG 97577 UniProt KB=Q8BWJ3   | Phka2 | Phosphorylase b kinase regulatory subunit alpha, liver isoform;Phka2 | Q8BWJ3 | protein binding;kinase activator activity;kinase regulator activity | carbohydrate metabolic process                                                                                                                                                                                                                                                                 | kinase activator    | Heterotrimeric G-protein signaling pathway-Gi alpha and Gs alpha mediated pathway->Phosphorylase b kinase;;                                                                                                                                                                                                                                                                                                                                                                                                                                                                                                                                  |
| MOUSE MG 1354730 UniProt KB=Q9Z2H2 | Rgs6  | Regulator of G-protein signaling 6;Rgs6                              | Q9Z2H2 | protein binding;small GTPase regulator activity                     | cell surface receptor linked signal transduction;signal transduction;dorsal/ventral axis specification                                                                                                                                                                                         | G-protein modulator | Heterotrimeric G-protein signaling pathway-Gi alpha and Gs alpha mediated pathway->Regulator of G-protein signaling;;Heterotrimeric G-protein signaling pathway-Gq alpha and Go alpha mediated pathway->Regulator of G-protein signaling;;                                                                                                                                                                                                                                                                                                                                                                                                   |

| (ii) NAc increase, Wit only        |             |                                            |            |                                                       |                                                                                                                                                                                                                                    |                       |                            |                                                                                                                                                                                                                                                                                                                                                                                                                                                                                                                                                                                                                        |
|------------------------------------|-------------|--------------------------------------------|------------|-------------------------------------------------------|------------------------------------------------------------------------------------------------------------------------------------------------------------------------------------------------------------------------------------|-----------------------|----------------------------|------------------------------------------------------------------------------------------------------------------------------------------------------------------------------------------------------------------------------------------------------------------------------------------------------------------------------------------------------------------------------------------------------------------------------------------------------------------------------------------------------------------------------------------------------------------------------------------------------------------------|
| Gene ID                            | Gene symbol | Gene name                                  | Protein ID | GO Mol Function                                       | GO Biological Process                                                                                                                                                                                                              | GO Cellular Component | Panther Protein Class      | Pathway                                                                                                                                                                                                                                                                                                                                                                                                                                                                                                                                                                                                                |
| MOUSE MG 99676 UniProt KB=Q80TL1   | Adcy2       | Adenylate cyclase type 2;Adcy2             | Q80TL1     | adenylate cyclase activity;guanylate cyclase activity | nucleobase, nucleoside, nucleotide and nucleic acid metabolic process                                                                                                                                                              |                       | adenylate cyclase          | 5HT4 type receptor mediated signaling pathway->AC;;5HT1 type receptor mediated signaling pathway->AC;;Beta3 adrenergic receptor signaling pathway->AC;;Endothelin signaling pathway->3',5'-cyclic AMP synthetase;;Inflammation mediated by chemokine and cytokine signaling pathway->Adenylyl cyclase;;GABA-B_receptor_II_signaling->Adenylate cyclase;;Beta1 adrenergic receptor signaling pathway->AC;;Beta2 adrenergic receptor signaling pathway->AC;;Heterotrimeric G-protein signaling pathway-Gi alpha and Gs alpha mediated pathway->Adenylyl cyclase;;Histamine H2 receptor mediated signaling pathway->AC;;; |
| MOUSE MG 99673 UniProt KB=P84309   | Adcy5       | Adenylate cyclase type 5;Adcy5             | P84309     | adenylate cyclase activity;guanylate cyclase activity | nucleobase, nucleoside, nucleotide and nucleic acid metabolic process                                                                                                                                                              |                       | adenylate cyclase          | Endothelin signaling pathway->3',5'-cyclic AMP synthetase;;Inflammation mediated by chemokine and cytokine signaling pathway->Adenylyl cyclase;;GABA-B_receptor_II_signaling->Adenylate cyclase;;Heterotrimeric G-protein signaling pathway-Gi alpha and Gs alpha mediated pathway->Adenylyl cyclase;;;                                                                                                                                                                                                                                                                                                                |
| MOUSE MG 88495 UniProt KB=P27699   | Crem        | cAMP-responsive element modulator;Crem     | P27699     | DNA binding;transcription factor activity             | immune system process;neurological system process;signal transduction;nucleobase, nucleoside, nucleotide and nucleic acid metabolic process;signal transduction;ectoderm development;nervous system development;response to stress |                       | CREB transcription factor  | Transcription regulation by bZIP transcription factor->CREB;;Heterotrimeric G-protein signaling pathway-Gi alpha and Gs alpha mediated pathway->CREB binding protein;;Apoptosis signaling pathway->Activating transcription factor;;;                                                                                                                                                                                                                                                                                                                                                                                  |
| MOUSE MG 88396 UniProt KB=P12657   | Chrm1       | Muscarinic acetylcholine receptor M1;Chrm1 | P12657     | G-protein coupled receptor activity                   | immune system process;muscle contraction;neurotransmitter secretion;cell surface receptor linked signal transduction;synaptic transmission;signal transduction;cell-cell signaling;response to stress                              |                       | G-protein coupled receptor | Alzheimer disease-amyloid secretase pathway->Muscarinic acetylcholine receptors;;Muscarinic acetylcholine receptor 1 and 3 signaling pathway->mAChR1/3;;Heterotrimeric G-protein signaling pathway-Gi alpha and Gs alpha mediated pathway->Gi protein coupled receptor;;Heterotrimeric G-protein signaling pathway-Gq alpha and Go alpha mediated pathway->Go-protein coupled receptor;;Heterotrimeric G-protein signaling pathway-Gq alpha and Go alpha mediated pathway->Gq-protein coupled receptor;;;                                                                                                              |
| MOUSE MG 94925 UniProt KB=P30728   | Drd3        | D(3) dopamine receptor;Drd3                | P30728     | G-protein coupled receptor activity                   | immune system process;muscle contraction;neurological system process;cell surface receptor linked signal transduction;synaptic transmission;signal transduction;cell-cell signaling                                                |                       | G-protein coupled receptor | Heterotrimeric G-protein signaling pathway-Gi alpha and Gs alpha mediated pathway->Gi protein coupled receptor;;Heterotrimeric G-protein signaling pathway-Gq alpha and Go alpha mediated pathway->Go-protein coupled receptor;;;                                                                                                                                                                                                                                                                                                                                                                                      |
| MOUSE MG 1351341 UniProt KB=Q68EF4 | Grm4        | Metabotropic glutamate receptor 4;Grm4     | Q68EF4     | G-protein coupled receptor activity                   | neurological system process;cell surface receptor linked signal transduction;signal transduction                                                                                                                                   |                       | G-protein coupled receptor | Heterotrimeric G-protein signaling pathway-Gi alpha and Gs alpha mediated pathway->Gi protein coupled receptor;;Heterotrimeric G-protein signaling pathway-Gq alpha and Go alpha mediated pathway->Go-protein coupled receptor;;Metabotropic glutamate receptor group III pathway->mGluR4/6/7/8;;Heterotrimeric G-protein signaling pathway-Gq alpha and Go alpha mediated pathway->Gq-protein coupled receptor;;;                                                                                                                                                                                                     |



|                                    |      |                                                              |        |                                     |                                                                                                                                                                                              |                                  |                            |                                                                                                                                                                                                                                                                                                                                                                                                                                                                                                                                                                                                                                                                                                                                                                                                                                                                                                                                                                                                                                                                                                                                                                                                                                                                                                                                                                                                                                                                                                                                                                                                                                                      |          |
|------------------------------------|------|--------------------------------------------------------------|--------|-------------------------------------|----------------------------------------------------------------------------------------------------------------------------------------------------------------------------------------------|----------------------------------|----------------------------|------------------------------------------------------------------------------------------------------------------------------------------------------------------------------------------------------------------------------------------------------------------------------------------------------------------------------------------------------------------------------------------------------------------------------------------------------------------------------------------------------------------------------------------------------------------------------------------------------------------------------------------------------------------------------------------------------------------------------------------------------------------------------------------------------------------------------------------------------------------------------------------------------------------------------------------------------------------------------------------------------------------------------------------------------------------------------------------------------------------------------------------------------------------------------------------------------------------------------------------------------------------------------------------------------------------------------------------------------------------------------------------------------------------------------------------------------------------------------------------------------------------------------------------------------------------------------------------------------------------------------------------------------|----------|
| MOUSE MGi=109246 UniProtKB=P97288  | Htr4 | 5-hydroxytryptamine receptor 4;Htr4                          | P97288 | G-protein coupled receptor activity | immune system process;muscle contraction;visual perception;sensory perception;cell surface receptor linked signal transduction;synaptic transmission;signal transduction;cell-cell signaling |                                  | G-protein coupled receptor | Heterotrimeric G-protein signaling pathway-Gi alpha and Gs alpha mediated pathway->Gi protein coupled receptor;;5HT4 type receptor mediated signaling pathway->5HT4 Receptor;;Heterotrimeric G-protein signaling pathway-Gi alpha and Gs alpha mediated pathway->Gs-protein coupled receptor;;;                                                                                                                                                                                                                                                                                                                                                                                                                                                                                                                                                                                                                                                                                                                                                                                                                                                                                                                                                                                                                                                                                                                                                                                                                                                                                                                                                      | Gi/Gs    |
| MOUSE MGi=1196627 UniProtKB=Q9R1C8 | Htr6 | 5-hydroxytryptamine receptor 6;Htr6                          | Q9R1C8 | G-protein coupled receptor activity | neurological system process;cell surface receptor linked signal transduction;signal transduction                                                                                             |                                  | G-protein coupled receptor | Heterotrimeric G-protein signaling pathway-Gi alpha and Gs alpha mediated pathway->Gi protein coupled receptor;;Heterotrimeric G-protein signaling pathway-Gi alpha and Gs alpha mediated pathway->Gs-protein coupled receptor;;;                                                                                                                                                                                                                                                                                                                                                                                                                                                                                                                                                                                                                                                                                                                                                                                                                                                                                                                                                                                                                                                                                                                                                                                                                                                                                                                                                                                                                    | Gi/Gs    |
| MOUSE MGi=97438 UniProtKB=P32300   | Opr1 | Delta-type opioid receptor;Opr1                              | P32300 | G-protein coupled receptor activity | sensory perception;cell surface receptor linked signal transduction;synaptic transmission;cell motion;signal transduction;cell-cell signaling                                                |                                  | G-protein coupled receptor | Heterotrimeric G-protein signaling pathway-Gi alpha and Gs alpha mediated pathway->Gi protein coupled receptor;;Heterotrimeric G-protein signaling pathway-Gq alpha and Go alpha mediated pathway->Go-protein coupled receptor;;;                                                                                                                                                                                                                                                                                                                                                                                                                                                                                                                                                                                                                                                                                                                                                                                                                                                                                                                                                                                                                                                                                                                                                                                                                                                                                                                                                                                                                    | Gi/Go    |
| MOUSE MGi=95774 UniProtKB=Q8CGK7   | Gnal | Guanine nucleotide-binding protein G(olf) subunit alpha;Gnal | Q8CGK7 | GTPase activity;protein binding     | cell surface receptor linked signal transduction;signal transduction                                                                                                                         | heterotrimeric G-protein complex | heterotrimeric G-protein   | 5HT4 type receptor mediated signaling pathway->G-protein;;Endothelin signaling pathway->stimulatory G protein;;Beta3 adrenergic receptor signaling pathway->G-Protein;;Histamine H2 receptor mediated signaling pathway->G-Protein;;Heterotrimeric G-protein signaling pathway-Gi alpha and Gs alpha mediated pathway->Gs alpha subunit;;Beta1 adrenergic receptor signaling pathway->G-Protein;;Beta2 adrenergic receptor signaling pathway->G-Protein;;Corticotropin releasing factor receptor signaling pathway->G-Protein;;;                                                                                                                                                                                                                                                                                                                                                                                                                                                                                                                                                                                                                                                                                                                                                                                                                                                                                                                                                                                                                                                                                                                     | Gs-alpha |
| MOUSE MGi=104581 UniProtKB=P29387  | Gnb4 | Guanine nucleotide-binding protein subunit beta-4;Gnb4       | P29387 | GTPase activity;protein binding     | sensory perception;cell surface receptor linked signal transduction;signal transduction                                                                                                      | heterotrimeric G-protein complex | hydrolase                  | Heterotrimeric G-protein signaling pathway-rod outer segment phototransduction->G protein, beta subunit;;5HT4 type receptor mediated signaling pathway->G-protein;;5HT1 type receptor mediated signaling pathway->G-protein;;Endogenous_cannabinoid_signaling->Gbeta;;Inflammation mediated by chemokine and cytokine signaling pathway->G beta/gamma subunits;;Beta3 adrenergic receptor signaling pathway->G-Protein;;Thyrotropin-releasing hormone receptor signaling pathway->G-Protein;;Muscarinic acetylcholine receptor 1 and 3 signaling pathway->Gq;;Heterotrimeric G-protein signaling pathway-Gi alpha and Gs alpha mediated pathway->G protein, beta subunit;;Heterotrimeric G-protein signaling pathway-Gq alpha and Go alpha mediated pathway->G protein-activated inward rectifying potassium channel;;Histamine H2 receptor mediated signaling pathway->G-Protein;;PI3 kinase pathway->Gbetagamma;;Metabotropic glutamate receptor group III pathway->Gi;;Metabotropic glutamate receptor group II pathway->G-protein;;Muscarinic acetylcholine receptor 2 and 4 signaling pathway->Gi;;GABA-B_receptor_II_signaling->Gbeta;;Oxytocin receptor mediated signaling pathway->G-Protein;;Heterotrimeric G-protein signaling pathway-Gq alpha and Go alpha mediated pathway->G protein beta subunit;;Beta1 adrenergic receptor signaling pathway->G-Protein;;Beta2 adrenergic receptor signaling pathway->G-Protein;;5HT2 type receptor mediated signaling pathway->G-protein;;Histamine H1 receptor mediated signaling pathway->G-Protein;;Wnt signaling pathway->G_Beta;;Corticotropin releasing factor receptor signaling pathway->G- | G-beta   |

|                                    |       |                                                                        |        |                                                                                            |                                                                                                                                                                        |                                  |                                                   |                                                                                                                                                                                                                                                                                                                                                                                                                                                                                                                                                                                                                                                                                                                                                                                                                                                                                                                                                                                                                                                                                                                                                                                                                                                                                                                                                                                                                                                                                                                      |         |
|------------------------------------|-------|------------------------------------------------------------------------|--------|--------------------------------------------------------------------------------------------|------------------------------------------------------------------------------------------------------------------------------------------------------------------------|----------------------------------|---------------------------------------------------|----------------------------------------------------------------------------------------------------------------------------------------------------------------------------------------------------------------------------------------------------------------------------------------------------------------------------------------------------------------------------------------------------------------------------------------------------------------------------------------------------------------------------------------------------------------------------------------------------------------------------------------------------------------------------------------------------------------------------------------------------------------------------------------------------------------------------------------------------------------------------------------------------------------------------------------------------------------------------------------------------------------------------------------------------------------------------------------------------------------------------------------------------------------------------------------------------------------------------------------------------------------------------------------------------------------------------------------------------------------------------------------------------------------------------------------------------------------------------------------------------------------------|---------|
| MOUSE MG 95787 UniProt KB=Q61016   | Gng7  | Guanine nucleotide-binding protein G(I)/G(S)/G(O) subunit gamma-7;Gng7 | Q61016 | GTPase activity;protein binding                                                            | cell surface receptor linked signal transduction;signal transduction                                                                                                   | heterotrimeric G-protein complex | heterotrimeric G-protein                          | 5HT4 type receptor mediated signaling pathway->G-protein;;5HT1 type receptor mediated signaling pathway->G-protein;;Inflammation mediated by chemokine and cytokine signaling pathway->G beta/gamma subunits;;Beta3 adrenergic receptor signaling pathway->G-Protein;;GABA-B_receptor_IL_signaling->Ggamma;;Thyrotropin-releasing hormone receptor signaling pathway->G-Protein;;Muscarinic acetylcholine receptor 1 and 3 signaling pathway->Gq;;Heterotrimeric G-protein signaling pathway-Gq alpha and Go alpha mediated pathway->G protein-activated inward rectifying potassium channel;;Wnt signaling pathway->Ggamma;;Histamine H2 receptor mediated signaling pathway->G-Protein;;Metabotropic glutamate receptor group III pathway->Gi;;Endogenous_cannabinoid_signaling->Ggamma;;Heterotrimeric G-protein signaling pathway-rod outer segment phototransduction->G protein gamma subunit;;Metabotropic glutamate receptor group II pathway->G-protein;;Muscarinic acetylcholine receptor 2 and 4 signaling pathway->Gi;;Oxytocin receptor mediated signaling pathway->G-Protein;;Beta1 adrenergic receptor signaling pathway->G-Protein;;Beta2 adrenergic receptor signaling pathway->G-Protein;;5HT2 type receptor mediated signaling pathway->G-protein;;Histamine H1 receptor mediated signaling pathway->G-Protein;;Heterotrimeric G-protein signaling pathway-Gi alpha and Gs alpha mediated pathway->G protein gamma subunit;;Corticotropin releasing factor receptor signaling pathway->G-Protein;; | G-gamma |
| MOUSE MG 1354739 UniProt KB=Q9Z2H1 | Rgs11 | Regulator of G-protein signaling 11;Rgs11                              | Q9Z2H1 | protein binding;small GTPase regulator activity                                            | cell surface receptor linked signal transduction;signal transduction;dorsal/ventral axis specification                                                                 |                                  | G-protein modulator                               | Heterotrimeric G-protein signaling pathway-Gi alpha and Gs alpha mediated pathway->Regulator of G-protein signaling;;Heterotrimeric G-protein signaling pathway-Gq alpha and Go alpha mediated pathway->Regulator of G-protein signaling;;                                                                                                                                                                                                                                                                                                                                                                                                                                                                                                                                                                                                                                                                                                                                                                                                                                                                                                                                                                                                                                                                                                                                                                                                                                                                           |         |
| MOUSE MG 108408 UniProt KB=Q8BXT1  | Rgs8  | Regulator of G-protein signaling 8;Rgs8                                | Q8BXT1 | protein binding;small GTPase regulator activity                                            | cell surface receptor linked signal transduction;signal transduction;dorsal/ventral axis specification                                                                 |                                  | G-protein modulator                               | Heterotrimeric G-protein signaling pathway-Gi alpha and Gs alpha mediated pathway->Regulator of G-protein signaling;;Heterotrimeric G-protein signaling pathway-Gq alpha and Go alpha mediated pathway->Regulator of G-protein signaling;;                                                                                                                                                                                                                                                                                                                                                                                                                                                                                                                                                                                                                                                                                                                                                                                                                                                                                                                                                                                                                                                                                                                                                                                                                                                                           |         |
| MOUSE MG 2142610 UniProt KB=Q3ZT31 | Snx25 | Sorting nexin-25;Snx25                                                 | Q3ZT31 | protein binding;small GTPase regulator activity                                            | intracellular protein transport;intracellular signaling cascade;signal transduction                                                                                    |                                  | G-protein modulator                               | Heterotrimeric G-protein signaling pathway-Gi alpha and Gs alpha mediated pathway->Regulator of G-protein signaling-PX1;;                                                                                                                                                                                                                                                                                                                                                                                                                                                                                                                                                                                                                                                                                                                                                                                                                                                                                                                                                                                                                                                                                                                                                                                                                                                                                                                                                                                            |         |
| MOUSE MG 1915089 UniProt KB=Q61R34 | Gpsm1 | G-protein-signaling modulator 1;Gpsm1                                  | Q61R34 | protein binding;small GTPase regulator activity;guanyl-nucleotide exchange factor activity | neurological system process;mitosis;cell surface receptor linked signal transduction;synaptic transmission;cytokinesis;mitosis;signal transduction;cell-cell signaling |                                  | transmembrane receptor regulatory/adaptor protein | Heterotrimeric G-protein signaling pathway-Gq alpha and Go alpha mediated pathway->Activator of G-protein signaling;;Heterotrimeric G-protein signaling pathway-Gi alpha and Gs alpha mediated pathway->Activator of G-protein signaling;;                                                                                                                                                                                                                                                                                                                                                                                                                                                                                                                                                                                                                                                                                                                                                                                                                                                                                                                                                                                                                                                                                                                                                                                                                                                                           |         |
| MOUSE MG 1923373 UniProt KB=Q8VDU0 | Gpsm2 | G-protein-signaling modulator 2;Gpsm2                                  | Q8VDU0 | protein binding;small GTPase regulator activity;guanyl-nucleotide exchange factor activity | neurological system process;mitosis;cell surface receptor linked signal transduction;synaptic transmission;cytokinesis;mitosis;signal transduction;cell-cell signaling |                                  | transmembrane receptor regulatory/adaptor protein | Heterotrimeric G-protein signaling pathway-Gq alpha and Go alpha mediated pathway->Activator of G-protein signaling;;Heterotrimeric G-protein signaling pathway-Gi alpha and Gs alpha mediated pathway->Activator of G-protein signaling;;                                                                                                                                                                                                                                                                                                                                                                                                                                                                                                                                                                                                                                                                                                                                                                                                                                                                                                                                                                                                                                                                                                                                                                                                                                                                           |         |
| MOUSE MG 1916299 UniProt KB=Q9QXS8 | Cml5  | Probable N-acetyltransferase CML5;Cml5                                 | Q9QXS8 |                                                                                            |                                                                                                                                                                        |                                  |                                                   |                                                                                                                                                                                                                                                                                                                                                                                                                                                                                                                                                                                                                                                                                                                                                                                                                                                                                                                                                                                                                                                                                                                                                                                                                                                                                                                                                                                                                                                                                                                      |         |

| (v) NAc sustained decrease, Coc & Wit |             |                                                                      |            |                                                                                                            |                                                                                                                                                                                                                                    |                       |                            |                                                                                                                                                                                                                                                                                                                                                                                   |
|---------------------------------------|-------------|----------------------------------------------------------------------|------------|------------------------------------------------------------------------------------------------------------|------------------------------------------------------------------------------------------------------------------------------------------------------------------------------------------------------------------------------------|-----------------------|----------------------------|-----------------------------------------------------------------------------------------------------------------------------------------------------------------------------------------------------------------------------------------------------------------------------------------------------------------------------------------------------------------------------------|
| Gene ID                               | Gene symbol | Gene name                                                            | Protein ID | GO Mol Function                                                                                            | GO Biological Process                                                                                                                                                                                                              | GO Cellular Component | Panther Protein Class      | Pathway                                                                                                                                                                                                                                                                                                                                                                           |
| MOUSE MG1=103249 UniProtKB=P62204     | Calm3       | Calmodulin;Calm3                                                     | P62204     | calcium ion binding;calmodulin binding                                                                     | cell cycle;intracellular signaling cascade;cell cycle;signal transduction                                                                                                                                                          |                       | calmodulin                 | Heterotrimeric G-protein signaling pathway-Gi alpha and Gs alpha mediated pathway->Phosphorylase b kinase;;T cell activation->Calmodulin;;B cell activation->Calmodulin;;Heterotrimeric G-protein signaling pathway-rod outer segment phototransduction->Calmodulin;;;                                                                                                            |
| MOUSE MG1=108007 UniProtKB=P48543     | Kcnj9       | G protein-activated inward rectifier potassium channel 3;Kcnj9       | P48543     | cation transmembrane transporter activity;voltage-gated potassium channel activity;cation channel activity | muscle contraction;neuronal action potential propagation;cation transport                                                                                                                                                          |                       | potassium channel          | Muscarinic acetylcholine receptor 2 and 4 signaling pathway->G protein-coupled inwardly rectifying potassium channel;;Heterotrimeric G-protein signaling pathway-Gq alpha and Go alpha mediated pathway->G-protein receptor kinase;;Heterotrimeric G-protein signaling pathway-Gi alpha and Gs alpha mediated pathway->G protein-activated inward rectifying potassium channel;;; |
| MOUSE MG1=99946 UniProtKB=Q61817      | Creb3       | Processed cyclic AMP-responsive element-binding protein 3;Creb3      | Q61817     | DNA binding;transcription factor activity                                                                  | immune system process;neurological system process;signal transduction;nucleobase, nucleoside, nucleotide and nucleic acid metabolic process;signal transduction;ectoderm development;nervous system development;response to stress |                       | CREB transcription factor  | Transcription regulation by bZIP transcription factor->CREB;;Heterotrimeric G-protein signaling pathway-Gi alpha and Gs alpha mediated pathway->CREB binding protein;;;                                                                                                                                                                                                           |
| MOUSE MG1=1338057 UniProtKB=Q9EQ15    | Gnb11       | Guanine nucleotide-binding protein subunit beta-like protein 1;Gnb11 | Q9EQ15     | G-protein coupled receptor activity                                                                        | cell surface receptor linked signal transduction;signal transduction                                                                                                                                                               |                       | G-protein coupled receptor |                                                                                                                                                                                                                                                                                                                                                                                   |
| MOUSE MG1=107619 UniProtKB=P70174     | Hrh1        | Histamine H1 receptor;Hrh1                                           | P70174     | G-protein coupled receptor activity                                                                        | immune system process;muscle contraction;neurotransmitter secretion;cell surface receptor linked signal transduction;synaptic transmission;signal transduction;cell-cell signaling;response to stress                              |                       | G-protein coupled receptor | Histamine H1 receptor mediated signaling pathway->H1;;Heterotrimeric G-protein signaling pathway-Gi alpha and Gs alpha mediated pathway->Gs-protein coupled receptor;;;                                                                                                                                                                                                           |
| MOUSE MG1=2139279 UniProtKB=P58406    | Hrh3        | Histamine H3 receptor;Hrh3                                           | P58406     | G-protein coupled receptor activity                                                                        | immune system process;muscle contraction;neurotransmitter secretion;cell surface receptor linked signal transduction;synaptic transmission;signal transduction;cell-cell signaling;response to stress                              |                       | G-protein coupled receptor | Heterotrimeric G-protein signaling pathway-Gi alpha and Gs alpha mediated pathway->Gs-protein coupled receptor;;;                                                                                                                                                                                                                                                                 |
| MOUSE MG1=102967 UniProtKB=Q61184     | Mtnr1a      | Melatonin receptor type 1A;Mtnr1a                                    | Q61184     | G-protein coupled receptor activity                                                                        | immune system process;sensory perception;cell surface receptor linked signal transduction;cell-cell signaling;cell motion;signal transduction;cell-cell signaling                                                                  |                       | G-protein coupled receptor | Heterotrimeric G-protein signaling pathway-Gi alpha and Gs alpha mediated pathway->Gi protein coupled receptor;;;                                                                                                                                                                                                                                                                 |
| MOUSE MG1=98328 UniProtKB=P30875      | Sstr2       | Somatostatin receptor type 2;Sstr2                                   | P30875     | G-protein coupled receptor activity                                                                        | sensory perception;cell surface receptor linked signal transduction;synaptic transmission;cell motion;signal transduction;cell-cell signaling                                                                                      |                       | G-protein coupled receptor | Heterotrimeric G-protein signaling pathway-Gi alpha and Gs alpha mediated pathway->Gi protein coupled receptor;;Heterotrimeric G-protein signaling pathway-Gi alpha and Gs alpha mediated pathway->Gs-protein coupled receptor;;Heterotrimeric G-protein signaling pathway-Gq alpha and Go alpha mediated pathway->Go-protein coupled receptor;;;                                 |

|                                  |       |                                                                       |        |                                 |                                                                                         |                                  |                          |                                                                                                                                                                                                                                                                                                                                                                                                                                                                                                                                                                                                                                                                                                                                                                                                                                                                                                                                                                                                                                                                                                                                                                                                                                                                                                                                                                                                                                                                                                                                                                                                                                                      |       |
|----------------------------------|-------|-----------------------------------------------------------------------|--------|---------------------------------|-----------------------------------------------------------------------------------------|----------------------------------|--------------------------|------------------------------------------------------------------------------------------------------------------------------------------------------------------------------------------------------------------------------------------------------------------------------------------------------------------------------------------------------------------------------------------------------------------------------------------------------------------------------------------------------------------------------------------------------------------------------------------------------------------------------------------------------------------------------------------------------------------------------------------------------------------------------------------------------------------------------------------------------------------------------------------------------------------------------------------------------------------------------------------------------------------------------------------------------------------------------------------------------------------------------------------------------------------------------------------------------------------------------------------------------------------------------------------------------------------------------------------------------------------------------------------------------------------------------------------------------------------------------------------------------------------------------------------------------------------------------------------------------------------------------------------------------|-------|
| MOUSE MG 95772 UniProt KB=P08752 | Gnai2 | Guanine nucleotide-binding protein G(i), alpha-2 subunit;Gnai2        | P08752 | GTPase activity;protein binding | cell surface receptor linked signal transduction;signal transduction                    | heterotrimeric G-protein complex | heterotrimeric G-protein | PI3 kinase pathway->Galpha;;5HT1 type receptor mediated signaling pathway->G-protein;;Heterotrimeric G-protein signaling pathway->Gi alpha and Gs alpha mediated pathway->Gi alpha subunit;;Metabotropic glutamate receptor group III pathway->Gi;;Metabotropic glutamate receptor group II pathway->G-protein;;Muscarinic acetylcholine receptor 2 and 4 signaling pathway->Gi;::;                                                                                                                                                                                                                                                                                                                                                                                                                                                                                                                                                                                                                                                                                                                                                                                                                                                                                                                                                                                                                                                                                                                                                                                                                                                                  | Gnai2 |
| MOUSE MG 95781 UniProt KB=P62874 | Gnb1  | Guanine nucleotide-binding protein G(l)/G(s)/G(t) subunit beta-1;Gnb1 | P62874 | GTPase activity;protein binding | sensory perception;cell surface receptor linked signal transduction;signal transduction | heterotrimeric G-protein complex | hydrolase                | Heterotrimeric G-protein signaling pathway-rod outer segment phototransduction->G protein, beta subunit;;5HT4 type receptor mediated signaling pathway->G-protein;;5HT1 type receptor mediated signaling pathway->G-protein;;Endogenous_cannabinoid_signaling->Gbeta;;Inflammation mediated by chemokine and cytokine signaling pathway->G beta/gamma subunits;;Beta3 adrenergic receptor signaling pathway->G-Protein;;Thyrotropin-releasing hormone receptor signaling pathway->G-Protein;;Muscarinic acetylcholine receptor 1 and 3 signaling pathway->Gq;;Heterotrimeric G-protein signaling pathway-Gi alpha and Gs alpha mediated pathway->G protein, beta subunit;;Heterotrimeric G-protein signaling pathway-Gq alpha and Go alpha mediated pathway->G protein-activated inward rectifying potassium channel;;Histamine H2 receptor mediated signaling pathway->G-Protein;;PI3 kinase pathway->Gbetagamma;;Metabotropic glutamate receptor group III pathway->Gi;;Metabotropic glutamate receptor group II pathway->G-protein;;Muscarinic acetylcholine receptor 2 and 4 signaling pathway->Gi;;GABA-B_receptor_II_signaling->Gbeta;;Oxytocin receptor mediated signaling pathway->G-Protein;;Heterotrimeric G-protein signaling pathway-Gq alpha and Go alpha mediated pathway->G protein beta subunit;;Beta1 adrenergic receptor signaling pathway->G-Protein;;Beta2 adrenergic receptor signaling pathway->G-Protein;;5HT2 type receptor mediated signaling pathway->G-protein;;Histamine H1 receptor mediated signaling pathway->G-Protein;;Wnt signaling pathway->G_Beta;;Corticotropin releasing factor receptor signaling pathway->G- | Gnb1  |

|                                           |              |                                                                                 |               |                                        |                                                                                                |                                         |                                 |                                                                                                                                                                                                                                                                                                                                                                                                                                                                                                                                                                                                                                                                                                                                                                                                                                                                                                                                                                                                                                                                                                                                                                                                                                                                                                                                                                                                                                                                                                                                                                                                                                                                                                                                     |              |
|-------------------------------------------|--------------|---------------------------------------------------------------------------------|---------------|----------------------------------------|------------------------------------------------------------------------------------------------|-----------------------------------------|---------------------------------|-------------------------------------------------------------------------------------------------------------------------------------------------------------------------------------------------------------------------------------------------------------------------------------------------------------------------------------------------------------------------------------------------------------------------------------------------------------------------------------------------------------------------------------------------------------------------------------------------------------------------------------------------------------------------------------------------------------------------------------------------------------------------------------------------------------------------------------------------------------------------------------------------------------------------------------------------------------------------------------------------------------------------------------------------------------------------------------------------------------------------------------------------------------------------------------------------------------------------------------------------------------------------------------------------------------------------------------------------------------------------------------------------------------------------------------------------------------------------------------------------------------------------------------------------------------------------------------------------------------------------------------------------------------------------------------------------------------------------------------|--------------|
| <p>MOUSE MG1=95784 UniProtKB=P62880</p>   | <p>Gnb2</p>  | <p>Guanine nucleotide-binding protein G(I)/G(S)/G(T) subunit beta-2;Gnb2</p>    | <p>P62880</p> | <p>GTPase activity;protein binding</p> | <p>sensory perception;cell surface receptor linked signal transduction;signal transduction</p> | <p>heterotrimeric G-protein complex</p> | <p>hydrolase</p>                | <p>Heterotrimeric G-protein signaling pathway-rod outer segment phototransduction-&gt;G protein, beta subunit;;5HT4 type receptor mediated signaling pathway-&gt;G-protein;;5HT1 type receptor mediated signaling pathway-&gt;G-protein;;Endogenous_cannabinoid_signaling-&gt;Gbeta;;Inflammation mediated by chemokine and cytokine signaling pathway-&gt;G beta/gamma subunits;;Beta3 adrenergic receptor signaling pathway-&gt;G-Protein;;Thyrotropin-releasing hormone receptor signaling pathway-&gt;G-Protein;;Muscarinic acetylcholine receptor 1 and 3 signaling pathway-&gt;Gq;;Heterotrimeric G-protein signaling pathway-Gi alpha and Gs alpha mediated pathway-&gt;G protein, beta subunit;;Heterotrimeric G-protein signaling pathway-Gq alpha and Go alpha mediated pathway-&gt;G protein-activated inward rectifying potassium channel;;Histamine H2 receptor mediated signaling pathway-&gt;G-Protein;;PI3 kinase pathway-&gt;Gbetagamma;;Metabotropic glutamate receptor group III pathway-&gt;Gi;;Metabotropic glutamate receptor group II pathway-&gt;G-protein;;Muscarinic acetylcholine receptor 2 and 4 signaling pathway-&gt;Gi;;GABA-B_receptor_IL_signaling-&gt;Gbeta;;Oxytocin receptor mediated signaling pathway-&gt;G-Protein;;Heterotrimeric G-protein signaling pathway-Gq alpha and Go alpha mediated pathway-&gt;G protein beta subunit;;Beta1 adrenergic receptor signaling pathway-&gt;G-Protein;;Beta2 adrenergic receptor signaling pathway-&gt;G-Protein;;5HT2 type receptor mediated signaling pathway-&gt;G-protein;;Histamine H1 receptor mediated signaling pathway-&gt;G-Protein;;Wnt signaling pathway-&gt;G_Beta;;Corticotropin releasing factor receptor signaling pathway-&gt;G-</p> | <p>Gnb2</p>  |
| <p>MOUSE MG1=1336169 UniProtKB=Q9CXP8</p> | <p>Gng10</p> | <p>Guanine nucleotide-binding protein G(I)/G(S)/G(O) subunit gamma-10;Gng10</p> | <p>Q9CXP8</p> | <p>GTPase activity;protein binding</p> | <p>cell surface receptor linked signal transduction;signal transduction</p>                    | <p>heterotrimeric G-protein complex</p> | <p>heterotrimeric G-protein</p> | <p>5HT4 type receptor mediated signaling pathway-&gt;G-protein;;5HT1 type receptor mediated signaling pathway-&gt;G-protein;;Inflammation mediated by chemokine and cytokine signaling pathway-&gt;G beta/gamma subunits;;Beta3 adrenergic receptor signaling pathway-&gt;G-Protein;;GABA-B_receptor_IL_signaling-&gt;Ggamma;;Thyrotropin-releasing hormone receptor signaling pathway-&gt;G-Protein;;Muscarinic acetylcholine receptor 1 and 3 signaling pathway-&gt;Gq;;Heterotrimeric G-protein signaling pathway-Gq alpha and Go alpha mediated pathway-&gt;G protein-activated inward rectifying potassium channel;;Wnt signaling pathway-&gt;Ggamma;;Histamine H2 receptor mediated signaling pathway-&gt;G-Protein;;Metabotropic glutamate receptor group III pathway-&gt;Gi;;Endogenous_cannabinoid_signaling-&gt;Ggamma;;Heterotrimeric G-protein signaling pathway-rod outer segment phototransduction-&gt;G protein gamma subunit;;Metabotropic glutamate receptor group II pathway-&gt;G-protein;;Muscarinic acetylcholine receptor 2 and 4 signaling pathway-&gt;Gi;;Oxytocin receptor mediated signaling pathway-&gt;G-Protein;;Beta1 adrenergic receptor signaling pathway-&gt;G-Protein;;Beta2 adrenergic receptor signaling pathway-&gt;G-Protein;;5HT2 type receptor mediated signaling pathway-&gt;G-protein;;Histamine H1 receptor mediated signaling pathway-&gt;G-Protein;;Heterotrimeric G-protein signaling pathway-Gi alpha and Gs alpha mediated pathway-&gt;G protein gamma subunit;;Heterotrimeric G-protein signaling pathway-Gq alpha and Go alpha mediated pathway-&gt;G protein gamma subunit;;Corticotropin releasing factor receptor signaling pathway-&gt;G-Protein;;</p>                        | <p>Gng10</p> |

|                                                |       |                                                                          |        |                                 |                                                                                         |                                  |                          |                                                                                                                                                                                                                                                                                                                                                                                                                                                                                                                                                                                                                                                                                                                                                                                                                                                                                                                                                                                                                                                                                                                                                                                                                                                                                                                                                                                                                                                                                                                                                                                                                                      |       |
|------------------------------------------------|-------|--------------------------------------------------------------------------|--------|---------------------------------|-----------------------------------------------------------------------------------------|----------------------------------|--------------------------|--------------------------------------------------------------------------------------------------------------------------------------------------------------------------------------------------------------------------------------------------------------------------------------------------------------------------------------------------------------------------------------------------------------------------------------------------------------------------------------------------------------------------------------------------------------------------------------------------------------------------------------------------------------------------------------------------------------------------------------------------------------------------------------------------------------------------------------------------------------------------------------------------------------------------------------------------------------------------------------------------------------------------------------------------------------------------------------------------------------------------------------------------------------------------------------------------------------------------------------------------------------------------------------------------------------------------------------------------------------------------------------------------------------------------------------------------------------------------------------------------------------------------------------------------------------------------------------------------------------------------------------|-------|
| MOUSE MG1=19<br>13316 UniP<br>rotKB=P61<br>953 | Gng11 | Guanine nucleotide-binding protein G(I)/G(S)/G(O) subunit gamma-11;Gng11 | P61953 | GTPase activity;protein binding | cell surface receptor linked signal transduction;signal transduction                    | heterotrimeric G-protein complex | heterotrimeric G-protein | 5HT1 type receptor mediated signaling pathway->G-protein;;GABA-B_receptor_II_signaling->Ggamma;;Muscarinic acetylcholine receptor 1 and 3 signaling pathway->Gq;;PI3 kinase pathway->Gbetagamma;;Endogenous_cannabinoid_signaling->Ggamma;;Heterotrimeric G-protein signaling pathway-rod outer segment phototransduction->G protein gamma subunit;;Metabotropic glutamate receptor group II pathway->G-protein;;Muscarinic acetylcholine receptor 2 and 4 signaling pathway->Gi;;5HT2 type receptor mediated signaling pathway->G-protein;;Heterotrimeric G-protein signaling pathway-Gi alpha and Gs alpha mediated pathway->G protein gamma subunit;;Heterotrimeric G-protein signaling pathway-Gq alpha and Go alpha mediated pathway->G protein gamma subunit;.....                                                                                                                                                                                                                                                                                                                                                                                                                                                                                                                                                                                                                                                                                                                                                                                                                                                             | Gng11 |
| MOUSE MG1=19<br>25616 UniP<br>rotKB=Q9J<br>MF3 | Gng13 | Guanine nucleotide-binding protein G(I)/G(S)/G(O) subunit gamma-13;Gng13 | Q9JMF3 | GTPase activity;protein binding | sensory perception;cell surface receptor linked signal transduction;signal transduction | heterotrimeric G-protein complex | hydrolase                | Wnt signaling pathway->Ggamma;;Heterotrimeric G-protein signaling pathway-rod outer segment phototransduction->G protein gamma subunit;;Heterotrimeric G-protein signaling pathway-Gi alpha and Gs alpha mediated pathway->G protein gamma subunit;;Heterotrimeric G-protein signaling pathway-Gq alpha and Go alpha mediated pathway->G protein gamma subunit;.....                                                                                                                                                                                                                                                                                                                                                                                                                                                                                                                                                                                                                                                                                                                                                                                                                                                                                                                                                                                                                                                                                                                                                                                                                                                                 | Gng13 |
| MOUSE MG1=10<br>2704 UniP<br>rotKB=P632<br>16  | Gng3  | Guanine nucleotide-binding protein G(I)/G(S)/G(O) subunit gamma-3;Gng3   | P63216 | GTPase activity;protein binding | cell surface receptor linked signal transduction;signal transduction                    | heterotrimeric G-protein complex | heterotrimeric G-protein | 5HT1 type receptor mediated signaling pathway->G-protein;;5HT2 type receptor mediated signaling pathway->G-protein;;Inflammation mediated by chemokine and cytokine signaling pathway->G beta/gamma subunits;;Beta3 adrenergic receptor signaling pathway->G-Protein;;GABA-B_receptor_II_signaling->Ggamma;;Thyrotropin-releasing hormone receptor signaling pathway->G-Protein;;Muscarinic acetylcholine receptor 1 and 3 signaling pathway->Gq;;Heterotrimeric G-protein signaling pathway-Gq alpha and Go alpha mediated pathway->G protein-activated inward rectifying potassium channel;;Wnt signaling pathway->Ggamma;;Histamine H2 receptor mediated signaling pathway->G-Protein;;Metabotropic glutamate receptor group III pathway->Gi;;Endogenous_cannabinoid_signaling->Ggamma;;Heterotrimeric G-protein signaling pathway-rod outer segment phototransduction->G protein gamma subunit;;Metabotropic glutamate receptor group II pathway->G-protein;;Muscarinic acetylcholine receptor 2 and 4 signaling pathway->Gi;;Oxytocin receptor mediated signaling pathway->G-Protein;;Beta1 adrenergic receptor signaling pathway->G-Protein;;Beta2 adrenergic receptor signaling pathway->G-Protein;;5HT2 type receptor mediated signaling pathway->G-protein;;Histamine H1 receptor mediated signaling pathway->G-Protein;;Heterotrimeric G-protein signaling pathway-Gi alpha and Gs alpha mediated pathway->G protein gamma subunit;;Heterotrimeric G-protein signaling pathway-Gq alpha and Go alpha mediated pathway->G protein gamma subunit;;Corticotropin releasing factor receptor signaling pathway->G-Protein;..... | Gng3  |

|                                          |             |                                                                                 |               |                                        |                                                                             |                                         |                                 |                                                                                                                                                                                                                                                                                                                                                                                                                                                                                                                                                                                                                                                                                                                                                                                                                                                                                                                                                                                                                                                                                                                                                                                                                                                                                                                                                                                                                                                                                                                                                                                                   |             |
|------------------------------------------|-------------|---------------------------------------------------------------------------------|---------------|----------------------------------------|-----------------------------------------------------------------------------|-----------------------------------------|---------------------------------|---------------------------------------------------------------------------------------------------------------------------------------------------------------------------------------------------------------------------------------------------------------------------------------------------------------------------------------------------------------------------------------------------------------------------------------------------------------------------------------------------------------------------------------------------------------------------------------------------------------------------------------------------------------------------------------------------------------------------------------------------------------------------------------------------------------------------------------------------------------------------------------------------------------------------------------------------------------------------------------------------------------------------------------------------------------------------------------------------------------------------------------------------------------------------------------------------------------------------------------------------------------------------------------------------------------------------------------------------------------------------------------------------------------------------------------------------------------------------------------------------------------------------------------------------------------------------------------------------|-------------|
| <p>MOUSE MG 893584 UniProt KB=Q61017</p> | <p>Gng8</p> | <p>Guanine nucleotide-binding protein G(I)/G(S)/G(O) subunit gamma-T2;Gngt2</p> | <p>Q61017</p> | <p>GTPase activity;protein binding</p> | <p>cell surface receptor linked signal transduction;signal transduction</p> | <p>heterotrimeric G-protein complex</p> | <p>heterotrimeric G-protein</p> | <p>5HT4 type receptor mediated signaling pathway-&gt;G-protein;;5HT1 type receptor mediated signaling pathway-&gt;G-protein;;Beta3 adrenergic receptor signaling pathway-&gt;G-Protein;;GABA-B_receptor_IL_signaling-&gt;Ggamma;;Thyrotropin-releasing hormone receptor signaling pathway-&gt;G-Protein;;Muscarinic acetylcholine receptor 1 and 3 signaling pathway-&gt;Gq;;Heterotrimeric G-protein signaling pathway-Gq alpha and Go alpha mediated pathway-&gt;G protein-activated inward rectifying potassium channel;;Histamine H2 receptor mediated signaling pathway-&gt;G-Protein;;PI3 kinase pathway-&gt;Gbetagamma;;Metabotropic glutamate receptor group III pathway-&gt;Gi;;Endogenous_cannabinoid_signaling-&gt;Ggamma;;Heterotrimeric G-protein signaling pathway-rod outer segment phototransduction-&gt;G protein gamma subunit;;Metabotropic glutamate receptor group II pathway-&gt;G-protein;;Muscarinic acetylcholine receptor 2 and 4 signaling pathway-&gt;Gi;;Oxytocin receptor mediated signaling pathway-&gt;G-Protein;;Beta1 adrenergic receptor signaling pathway-&gt;G-Protein;;Beta2 adrenergic receptor signaling pathway-&gt;G-Protein;;5HT2 type receptor mediated signaling pathway-&gt;G-protein;;Histamine H1 receptor mediated signaling pathway-&gt;G-Protein;;Heterotrimeric G-protein signaling pathway-Gi alpha and Gs alpha mediated pathway-&gt;G protein gamma subunit;;Corticotropin releasing factor receptor signaling pathway-&gt;G-Protein;.....</p>                                                                                             | <p>Gng8</p> |
| <p>MOUSE MG 109163 UniProt KB=P63078</p> | <p>Gng8</p> | <p>Guanine nucleotide-binding protein G(I)/G(S)/G(O) subunit gamma-8;Gng8</p>   | <p>P63078</p> | <p>GTPase activity;protein binding</p> | <p>cell surface receptor linked signal transduction;signal transduction</p> | <p>heterotrimeric G-protein complex</p> | <p>heterotrimeric G-protein</p> | <p>5HT4 type receptor mediated signaling pathway-&gt;G-protein;;5HT1 type receptor mediated signaling pathway-&gt;G-protein;;Inflammation mediated by chemokine and cytokine signaling pathway-&gt;G beta/gamma subunits;;Beta3 adrenergic receptor signaling pathway-&gt;G-Protein;;GABA-B_receptor_IL_signaling-&gt;Ggamma;;Thyrotropin-releasing hormone receptor signaling pathway-&gt;G-Protein;;Muscarinic acetylcholine receptor 1 and 3 signaling pathway-&gt;Gq;;Heterotrimeric G-protein signaling pathway-Gq alpha and Go alpha mediated pathway-&gt;G protein-activated inward rectifying potassium channel;;Wnt signaling pathway-&gt;Ggamma;;Histamine H2 receptor mediated signaling pathway-&gt;G-Protein;;Metabotropic glutamate receptor group III pathway-&gt;Gi;;Endogenous_cannabinoid_signaling-&gt;Ggamma;;Heterotrimeric G-protein signaling pathway-rod outer segment phototransduction-&gt;G protein gamma subunit;;Metabotropic glutamate receptor group II pathway-&gt;G-protein;;Muscarinic acetylcholine receptor 2 and 4 signaling pathway-&gt;Gi;;Oxytocin receptor mediated signaling pathway-&gt;G-Protein;;Beta1 adrenergic receptor signaling pathway-&gt;G-Protein;;Beta2 adrenergic receptor signaling pathway-&gt;G-Protein;;5HT2 type receptor mediated signaling pathway-&gt;G-protein;;Histamine H1 receptor mediated signaling pathway-&gt;G-Protein;;Heterotrimeric G-protein signaling pathway-Gi alpha and Gs alpha mediated pathway-&gt;G protein gamma subunit;;Corticotropin releasing factor receptor signaling pathway-&gt;G-Protein;.....</p> | <p></p>     |

|                                    |         |                                                                             |        |                                                                                     |                                                                                                                                                                                                                                                                                                                                                                                                  |                            |                                                                                                                                                                                                                                                                                                                                                                                                                                                                                                                                                                                                                                                                                    |
|------------------------------------|---------|-----------------------------------------------------------------------------|--------|-------------------------------------------------------------------------------------|--------------------------------------------------------------------------------------------------------------------------------------------------------------------------------------------------------------------------------------------------------------------------------------------------------------------------------------------------------------------------------------------------|----------------------------|------------------------------------------------------------------------------------------------------------------------------------------------------------------------------------------------------------------------------------------------------------------------------------------------------------------------------------------------------------------------------------------------------------------------------------------------------------------------------------------------------------------------------------------------------------------------------------------------------------------------------------------------------------------------------------|
| MOUSE MG 894315 UniProt KB=Q99JL6  | Rap1b   | Ras-related protein Rap-1b;Rap1b                                            | Q99JL6 | GTPase activity;protein binding                                                     | intracellular protein transport;endocytosis;cell surface receptor linked signal transduction;intracellular signaling cascade;cell adhesion;signal transduction;cell adhesion                                                                                                                                                                                                                     | small GTPase               | Heterotrimeric G-protein signaling pathway-Gq alpha and Go alpha mediated pathway->Ras associated protein 1;;Integrin signalling pathway->Rap1;;EGF receptor signaling pathway->Ras;;Heterotrimeric G-protein signaling pathway-Gi alpha and Gs alpha mediated pathway->Ras related protein 1;;;                                                                                                                                                                                                                                                                                                                                                                                   |
| MOUSE MG 1345146 UniProt KB=Q9WVL4 | Grk1    | Rhodopsin kinase;Grk1                                                       | Q9WVL4 | kinase activity                                                                     | sensory perception;cell surface receptor linked signal transduction;protein metabolic process;signal transduction                                                                                                                                                                                                                                                                                | protein kinase             | Heterotrimeric G-protein signaling pathway-rod outer segment phototransduction->Rhodopsin kinase;;Heterotrimeric G-protein signaling pathway-Gi alpha and Gs alpha mediated pathway->G protein receptor kinase;;Inflammation mediated by chemokine and cytokine signaling pathway->G-protein receptor kinase;;;                                                                                                                                                                                                                                                                                                                                                                    |
| MOUSE MG 97579 UniProt KB=P07934   | Phkg1   | Phosphorylase b kinase gamma catalytic chain, skeletal muscle isoform;Phkg1 | P07934 | kinase activity;structural constituent of cytoskeleton;cytoskeletal protein binding | immune system process;muscle contraction;neurological system process;induction of apoptosis;mitosis;meiosis;intracellular signaling cascade;carbohydrate metabolic process;protein metabolic process;cytokinesis;mitosis;meiosis;signal transduction;cellular component morphogenesis;cellular component morphogenesis;cellular component morphogenesis;embryonic development;response to stress | microtubule protein kinase | Heterotrimeric G-protein signaling pathway-Gi alpha and Gs alpha mediated pathway->Phosphorylase b kinase;;                                                                                                                                                                                                                                                                                                                                                                                                                                                                                                                                                                        |
| MOUSE MG 1916211 UniProt KB=Q9DB30 | Phkg2   | Phosphorylase b kinase gamma catalytic chain, testis/liver isoform;Phkg2    | Q9DB30 | kinase activity;structural constituent of cytoskeleton;cytoskeletal protein binding | immune system process;muscle contraction;neurological system process;induction of apoptosis;mitosis;meiosis;intracellular signaling cascade;carbohydrate metabolic process;protein metabolic process;cytokinesis;mitosis;meiosis;signal transduction;cellular component morphogenesis;cellular component morphogenesis;cellular component morphogenesis;embryonic development;response to stress | microtubule protein kinase | Heterotrimeric G-protein signaling pathway-Gi alpha and Gs alpha mediated pathway->Phosphorylase b kinase;;                                                                                                                                                                                                                                                                                                                                                                                                                                                                                                                                                                        |
| MOUSE MG 99474 UniProt KB=Q91Y14   | Arrb2   | Beta-arrestin-2;Arrb2                                                       | Q91Y14 | protein binding                                                                     | visual perception;sensory perception;intracellular protein transport;endocytosis;cell surface receptor linked signal transduction;signal transduction                                                                                                                                                                                                                                            | enzyme modulator           | Wnt signaling pathway->Beta-Arrestin;;Inflammation mediated by chemokine and cytokine signaling pathway->Arrestin;;Heterotrimeric G-protein signaling pathway-Gi alpha and Gs alpha mediated pathway->Arrestin;;;                                                                                                                                                                                                                                                                                                                                                                                                                                                                  |
| MOUSE MG 97759 UniProt KB=P12849   | Prkar1b | cAMP-dependent protein kinase type I-beta regulatory subunit;Prkar1b        | P12849 | protein binding;kinase regulator activity                                           | signal transduction;protein metabolic process;signal transduction                                                                                                                                                                                                                                                                                                                                | kinase modulator           | Heterotrimeric G-protein signaling pathway-Gi alpha and Gs alpha mediated pathway->Protein kinase A, regulatory subunit;;Transcription regulation by bZIP transcription factor->Protein Kinase A;;GABA-B_receptor_II_signaling->cAMP-dependent protein kinase;;Metabotropic glutamate receptor group II pathway->Protein Kinase A;;Endothelin signaling pathway->adenosine-3'-5'-cyclic monophosphate -dependent kinase;;Muscarinic acetylcholine receptor 2 and 4 signaling pathway->Protein Kinase A;;Metabotropic glutamate receptor group III pathway->Protein Kinase A;;Hedgehog signaling pathway->PKA;;Metabotropic glutamate receptor group I pathway->Protein Kinase A;;; |
| MOUSE MG 1915115 UniProt KB=Q9CQE5 | Rgs10   | Regulator of G-protein signaling 10;Rgs10                                   | Q9CQE5 | protein binding;small GTPase regulator activity                                     | cell surface receptor linked signal transduction;signal transduction;dorsal/ventral axis specification                                                                                                                                                                                                                                                                                           | G-protein modulator        | Heterotrimeric G-protein signaling pathway-Gi alpha and Gs alpha mediated pathway->Regulator of G-protein signaling;;Heterotrimeric G-protein signaling pathway-Gq alpha and Go alpha mediated pathway->Regulator of G-protein signaling;;;                                                                                                                                                                                                                                                                                                                                                                                                                                        |



|                                    |       |                                               |        |                                                 |                                                                                                        |              |                      |                                                                                                                                                                                                                                                                                                                                                  |
|------------------------------------|-------|-----------------------------------------------|--------|-------------------------------------------------|--------------------------------------------------------------------------------------------------------|--------------|----------------------|--------------------------------------------------------------------------------------------------------------------------------------------------------------------------------------------------------------------------------------------------------------------------------------------------------------------------------------------------|
| MOUSE MG 108407 UniProt KB=P97428  | Rgs16 | Regulator of G-protein signaling 16;Rgs16     | P97428 | protein binding;small GTPase regulator activity | cell surface receptor linked signal transduction;signal transduction;dorsal/ventral axis specification |              | G-protein modulator  | Heterotrimeric G-protein signaling pathway-Gi alpha and Gs alpha mediated pathway->Regulator of G-protein signaling;;Heterotrimeric G-protein signaling pathway-Gq alpha and Go alpha mediated pathway->Regulator of G-protein signaling;;;                                                                                                      |
| MOUSE MG 1098271 UniProt KB=O08849 | Rgs2  | Regulator of G-protein signaling 2;Rgs2       | O08849 | protein binding;small GTPase regulator activity | cell surface receptor linked signal transduction;signal transduction;dorsal/ventral axis specification |              | G-protein modulator  | Heterotrimeric G-protein signaling pathway-Gi alpha and Gs alpha mediated pathway->Regulator of G-protein signaling;;Heterotrimeric G-protein signaling pathway-Gq alpha and Go alpha mediated pathway->Regulator of G-protein signaling;;;                                                                                                      |
| MOUSE MG 1929866 UniProt KB=Q9QZB1 | Rgs20 | Regulator of G-protein signaling 20;Rgs20     | Q9QZB1 | protein binding;small GTPase regulator activity | cell surface receptor linked signal transduction;signal transduction;dorsal/ventral axis specification |              | G-protein modulator  | Heterotrimeric G-protein signaling pathway-Gi alpha and Gs alpha mediated pathway->Regulator of G-protein signaling;;Heterotrimeric G-protein signaling pathway-Gq alpha and Go alpha mediated pathway->Regulator of G-protein signaling;;;                                                                                                      |
| MOUSE MG 108409 UniProt KB=O08899  | Rgs4  | Regulator of G-protein signaling 4;Rgs4       | O08899 | protein binding;small GTPase regulator activity | cell surface receptor linked signal transduction;signal transduction;dorsal/ventral axis specification |              | G-protein modulator  | Heterotrimeric G-protein signaling pathway-Gi alpha and Gs alpha mediated pathway->Regulator of G-protein signaling;;Inflammation mediated by chemokine and cytokine signaling pathway->Regulator of G-protein signaling;;Heterotrimeric G-protein signaling pathway-Gq alpha and Go alpha mediated pathway->Regulator of G-protein signaling;;; |
| MOUSE MG 1338801 UniProt KB=Q7TMB8 | Sra1  | Cytoplasmic FMR1-interacting protein 1;Cyflp1 | Q7TMB8 | protein binding;small GTPase regulator activity | signal transduction;signal transduction                                                                |              | G-protein modulator  | Huntington disease->P53 tumor suppressor phosphoprotein;;;                                                                                                                                                                                                                                                                                       |
| MOUSE MG 103250 UniProt KB=P62204  | Calm3 | Calmodulin;Calm3                              | P62204 |                                                 |                                                                                                        |              |                      |                                                                                                                                                                                                                                                                                                                                                  |
| MOUSE MG 88251 UniProt KB=P62204   | Calm3 | Calmodulin;Calm3                              | P62204 |                                                 |                                                                                                        |              |                      |                                                                                                                                                                                                                                                                                                                                                  |
| MOUSE MG 894297 UniProt KB=O08585  | Cita  | Clathrin light chain A;Cita                   | O08585 |                                                 | intracellular protein transport;endocytosis                                                            | vesicle coat | vesicle coat protein | Heterotrimeric G-protein signaling pathway-Gq alpha and Go alpha mediated pathway->Clathrin;;Huntington disease->Clathrin;;Heterotrimeric G-protein signaling pathway-Gi alpha and Gs alpha mediated pathway->Clathrin;;;                                                                                                                        |
| MOUSE MG 1921575 UniProt KB=Q61RU5 | Cltb  | Clathrin light chain B;Cltb                   | Q61RU5 |                                                 | intracellular protein transport;endocytosis                                                            | vesicle coat | vesicle coat protein | Heterotrimeric G-protein signaling pathway-Gq alpha and Go alpha mediated pathway->Clathrin;;Huntington disease->Clathrin;;Heterotrimeric G-protein signaling pathway-Gi alpha and Gs alpha mediated pathway->Clathrin;;;                                                                                                                        |
| MOUSE MG 1344414 UniProt KB=Q80VJ2 | Sra1  | Steroid receptor RNA activator 1;Sra1         | Q80VJ2 |                                                 |                                                                                                        |              |                      |                                                                                                                                                                                                                                                                                                                                                  |
