# Supplementary material
Source: PubMed Central journal article supplement (PMC3553295)
Supplement: NIHMS416112-supplement-Supp_TableS4.pdf [file NIHMS416112-supplement-Supp_TableS4.pdf]

|    | A                                           | B        | C                           | D                                         | E                                            | F                                              | G                                           | H                              | I                                 | J                                   | K                                | L                                         | M                                            | N                                              | O                                           | P       | Q                                          | R                               | S                                          | T           |
|----|---------------------------------------------|----------|-----------------------------|-------------------------------------------|----------------------------------------------|------------------------------------------------|---------------------------------------------|--------------------------------|-----------------------------------|-------------------------------------|----------------------------------|-------------------------------------------|----------------------------------------------|------------------------------------------------|---------------------------------------------|---------|--------------------------------------------|---------------------------------|--------------------------------------------|-------------|
| 1  | <b>PANTHER Protein Class</b>                | Class ID | Mus musculus genes (26,185) | NAc sustained increase, Coc & Wit (1,387) | NAc sustained increase, Coc & Wit (expected) | NAc sustained increase, Coc & Wit (over/under) | NAc sustained increase, Coc & Wit (P-value) | NAc increase, Wit only (1,001) | NAc increase, Wit only (expected) | NAc increase, Wit only (over/under) | NAc increase, Wit only (P-value) | NAc sustained decrease, Coc & Wit (2,670) | NAc sustained decrease, Coc & Wit (expected) | NAc sustained decrease, Coc & Wit (over/under) | NAc sustained decrease, Coc & Wit (P-value) | P<0.001 | NAc sustained increase, Coc & Wit P<0.0001 | NAc increase, Wit only P<0.0001 | NAc sustained decrease, Coc & Wit P<0.0001 | Total lists |
| 2  | cytoskeletal protein                        | PC00126  | 446                         | 46                                        | 23.62                                        | +                                              | 2.45E-05                                    | 36                             | 17.05                             | +                                   | 3.54E-05                         | 92                                        | 45.48                                        | +                                              | 6.02E-10                                    | 1       | 1                                          | 1                               | 1                                          | 3           |
| 3  | transcription factor                        | PC00064  | 2109                        | 157                                       | 111.71                                       | +                                              | 1.33E-05                                    | 134                            | 80.62                             | +                                   | 7.09E-09                         | 280                                       | 215.05                                       | +                                              | 5.24E-06                                    | 1       | 1                                          | 1                               | 1                                          | 3           |
| 4  | transferase                                 | PC00122  | 1605                        | 147                                       | 85.02                                        | +                                              | 1.55E-10                                    | 115                            | 61.36                             | +                                   | 1.37E-10                         | 260                                       | 163.66                                       | +                                              | 3.71E-13                                    | 1       | 1                                          | 1                               | 1                                          | 3           |
| 5  | Unclassified                                | N/A      | 11104                       | 495                                       | 588.17                                       | -                                              | 1.92E-07                                    | 325                            | 424.48                            | -                                   | 6.91E-11                         | 1004                                      | 1132.24                                      | -                                              | 2.45E-07                                    | 1       | 1                                          | 1                               | 1                                          | 3           |
| 6  | kinase                                      | PC00152  | 718                         | 90                                        | 38.03                                        | +                                              | 2.09E-13                                    | 64                             | 27.45                             | +                                   | 9.47E-10                         | 83                                        | 73.21                                        | +                                              | 1.36E-01                                    | 0       | 1                                          | 1                               | 0                                          | 2           |
| 7  | protein kinase                              | PC00137  | 549                         | 69                                        | 29.08                                        | +                                              | 1.26E-10                                    | 52                             | 20.99                             | +                                   | 5.29E-09                         | 56                                        | 55.98                                        | +                                              | 5.17E-01                                    | 0       | 1                                          | 1                               | 0                                          | 2           |
| 8  | ribosomal protein                           | PC00225  | 498                         | 6                                         | 26.38                                        | -                                              | 1.79E-06                                    | 1                              | 19.04                             | -                                   | 9.17E-08                         | 44                                        | 50.78                                        | -                                              | 1.88E-01                                    | 0       | 1                                          | 1                               | 0                                          | 2           |
| 9  | DNA binding protein                         | PC00171  | 525                         | 55                                        | 27.81                                        | +                                              | 2.64E-06                                    | 29                             | 20.07                             | +                                   | 3.41E-02                         | 97                                        | 53.53                                        | +                                              | 4.20E-08                                    | 0       | 1                                          | 0                               | 1                                          | 2           |
| 10 | enzyme modulator                            | PC00053  | 939                         | 86                                        | 49.74                                        | +                                              | 1.18E-06                                    | 45                             | 35.9                              | +                                   | 7.54E-02                         | 152                                       | 95.75                                        | +                                              | 3.79E-08                                    | 0       | 1                                          | 0                               | 1                                          | 2           |
| 11 | receptor                                    | PC00000  | 1451                        | 112                                       | 76.86                                        | +                                              | 6.19E-05                                    | 71                             | 55.47                             | +                                   | 2.19E-02                         | 91                                        | 147.95                                       | -                                              | 1.64E-07                                    | 0       | 1                                          | 0                               | 1                                          | 2           |
| 12 | actin family cytoskeletal protein           | PC00085  | 217                         | 18                                        | 11.49                                        | +                                              | 4.49E-02                                    | 22                             | 8.3                               | +                                   | 5.13E-05                         | 47                                        | 22.13                                        | +                                              | 2.52E-06                                    | 0       | 0                                          | 1                               | 1                                          | 2           |
| 13 | DNA helicase                                | PC00093  | 81                          | 16                                        | 4.29                                         | +                                              | 1.10E-05                                    | 8                              | 3.1                               | +                                   | 1.40E-02                         | 7                                         | 8.26                                         | -                                              | 4.17E-01                                    | 0       | 1                                          | 0                               | 0                                          | 1           |
| 14 | G-protein modulator                         | PC00208  | 286                         | 48                                        | 15.15                                        | +                                              | 9.45E-12                                    | 22                             | 10.93                             | +                                   | 1.97E-03                         | 24                                        | 29.16                                        | -                                              | 1.95E-01                                    | 0       | 1                                          | 0                               | 0                                          | 1           |
| 15 | guanyl-nucleotide exchange factor           | PC00022  | 90                          | 21                                        | 4.77                                         | +                                              | 3.39E-08                                    | 6                              | 3.44                              | +                                   | 1.34E-01                         | 6                                         | 9.18                                         | -                                              | 1.91E-01                                    | 0       | 1                                          | 0                               | 0                                          | 1           |
| 16 | oxidoreductase                              | PC00214  | 683                         | 15                                        | 36.18                                        | -                                              | 4.95E-05                                    | 13                             | 26.11                             | -                                   | 3.30E-03                         | 67                                        | 69.64                                        | -                                              | 4.04E-01                                    | 0       | 1                                          | 0                               | 0                                          | 1           |
| 17 | transcription cofactor                      | PC00169  | 291                         | 34                                        | 15.41                                        | +                                              | 2.61E-05                                    | 23                             | 11.12                             | +                                   | 1.12E-03                         | 52                                        | 29.67                                        | +                                              | 1.18E-04                                    | 0       | 1                                          | 0                               | 0                                          | 1           |
| 18 | transporter                                 | PC00011  | 1286                        | 128                                       | 68.12                                        | +                                              | 1.62E-11                                    | 69                             | 49.16                             | +                                   | 3.49E-03                         | 123                                       | 131.13                                       | +                                              | 2.50E-01                                    | 0       | 1                                          | 0                               | 0                                          | 1           |
| 19 | non-motor actin binding protein             | PC00039  | 115                         | 10                                        | 6.09                                         | +                                              | 8.99E-02                                    | 15                             | 4.4                               | +                                   | 5.42E-05                         | 25                                        | 11.73                                        | +                                              | 4.82E-04                                    | 0       | 0                                          | 1                               | 0                                          | 1           |
| 20 | phosphodiesterase                           | PC00097  | 27                          | 4                                         | 1.43                                         | +                                              | 5.71E-02                                    | 7                              | 1.03                              | +                                   | 9.95E-05                         | 1                                         | 2.75                                         | -                                              | 2.39E-01                                    | 0       | 0                                          | 1                               | 0                                          | 1           |
| 21 | calcium-binding protein                     | PC00054  | 68                          | 1                                         | 3.6                                          | -                                              | 1.25E-01                                    | 2                              | 2.6                               | -                                   | 5.18E-01                         | 27                                        | 6.93                                         | +                                              | 5.60E-09                                    | 0       | 0                                          | 0                               | 1                                          | 1           |
| 22 | calmodulin                                  | PC00131  | 37                          | 0                                         | 1.96                                         | -                                              | 1.41E-01                                    | 2                              | 1.41                              | +                                   | 4.13E-01                         | 14                                        | 3.77                                         | +                                              | 4.07E-05                                    | 0       | 0                                          | 0                               | 1                                          | 1           |
| 23 | chaperone                                   | PC00151  | 131                         | 6                                         | 6.94                                         | -                                              | 4.58E-01                                    | 0                              | 5.01                              | -                                   | 6.60E-03                         | 42                                        | 13.36                                        | +                                              | 2.66E-10                                    | 0       | 0                                          | 0                               | 1                                          | 1           |
| 24 | G-protein                                   | PC00183  | 215                         | 6                                         | 11.39                                        | -                                              | 6.32E-02                                    | 7                              | 8.22                              | -                                   | 4.22E-01                         | 55                                        | 21.92                                        | +                                              | 1.77E-09                                    | 0       | 0                                          | 0                               | 1                                          | 1           |
| 25 | G-protein coupled receptor                  | PC00197  | 743                         | 50                                        | 39.36                                        | +                                              | 5.45E-02                                    | 31                             | 28.4                              | +                                   | 3.36E-01                         | 36                                        | 75.76                                        | -                                              | 2.11E-07                                    | 0       | 0                                          | 0                               | 1                                          | 1           |
| 26 | glycosyltransferase                         | PC00038  | 242                         | 16                                        | 12.82                                        | +                                              | 2.20E-01                                    | 21                             | 9.25                              | +                                   | 5.80E-04                         | 47                                        | 24.68                                        | +                                              | 3.73E-05                                    | 0       | 0                                          | 0                               | 1                                          | 1           |
| 27 | intracellular calcium-sensing protein       | PC00060  | 37                          | 0                                         | 1.96                                         | -                                              | 1.41E-01                                    | 2                              | 1.41                              | +                                   | 4.13E-01                         | 14                                        | 3.77                                         | +                                              | 4.07E-05                                    | 0       | 0                                          | 0                               | 1                                          | 1           |
| 28 | isomerase                                   | PC00114  | 97                          | 3                                         | 5.14                                         | -                                              | 2.46E-01                                    | 4                              | 3.71                              | +                                   | 5.08E-01                         | 33                                        | 9.89                                         | +                                              | 5.17E-09                                    | 0       | 0                                          | 0                               | 1                                          | 1           |
| 29 | ligand-gated ion channel                    | PC00124  | 237                         | 12                                        | 12.55                                        | -                                              | 5.13E-01                                    | 7                              | 9.06                              | -                                   | 3.16E-01                         | 4                                         | 24.17                                        | +                                              | 5.00E-07                                    | 0       | 0                                          | 0                               | 1                                          | 1           |
| 30 | membrane traffic protein                    | PC00124  | 329                         | 31                                        | 17.43                                        | +                                              | 1.96E-03                                    | 17                             | 12.58                             | +                                   | 1.34E-01                         | 61                                        | 33.55                                        | +                                              | 1.14E-05                                    | 0       | 0                                          | 0                               | 1                                          | 1           |
| 31 | microtubule family cytoskeletal protein     | PC00040  | 167                         | 22                                        | 8.85                                         | +                                              | 1.30E-04                                    | 10                             | 6.38                              | +                                   | 1.12E-01                         | 39                                        | 17.03                                        | +                                              | 3.22E-06                                    | 0       | 0                                          | 0                               | 1                                          | 1           |
| 32 | mRNA processing factor                      | PC00033  | 201                         | 9                                         | 10.65                                        | -                                              | 3.79E-01                                    | 9                              | 7.68                              | +                                   | 3.63E-01                         | 62                                        | 20.5                                         | +                                              | 8.97E-14                                    | 0       | 0                                          | 0                               | 1                                          | 1           |
| 33 | neuropeptide                                | PC00179  | 25                          | 1                                         | 1.32                                         | -                                              | 6.18E-01                                    | 0                              | 0.96                              | -                                   | 3.84E-01                         | 13                                        | 2.55                                         | +                                              | 2.88E-06                                    | 0       | 0                                          | 0                               | 1                                          | 1           |
| 34 | nucleic acid binding                        | PC00217  | 1964                        | 115                                       | 104.03                                       | +                                              | 1.43E-01                                    | 78                             | 75.08                             | +                                   | 3.80E-01                         | 351                                       | 200.26                                       | +                                              | 3.73E-24                                    | 0       | 0                                          | 0                               | 1                                          | 1           |
| 35 | nucleotidyltransferase                      | PC00045  | 96                          | 3                                         | 5.09                                         | -                                              | 2.53E-01                                    | 7                              | 3.67                              | +                                   | 7.88E-02                         | 26                                        | 9.79                                         | +                                              | 1.18E-05                                    | 0       | 0                                          | 0                               | 1                                          | 1           |
| 36 | phosphatase modulator                       | PC00139  | 66                          | 3                                         | 3.5                                          | -                                              | 5.37E-01                                    | 1                              | 2.52                              | -                                   | 2.82E-01                         | 20                                        | 6.73                                         | +                                              | 2.52E-05                                    | 0       | 0                                          | 0                               | 1                                          | 1           |
| 37 | protein phosphatase                         | PC00181  | 110                         | 11                                        | 5.83                                         | +                                              | 3.55E-02                                    | 6                              | 4.21                              | +                                   | 2.47E-01                         | 28                                        | 11.22                                        | +                                              | 1.68E-05                                    | 0       | 0                                          | 0                               | 1                                          | 1           |
| 38 | replication origin binding protein          | PC00015  | 53                          | 3                                         | 2.81                                         | +                                              | 5.32E-01                                    | 2                              | 2.03                              | -                                   | 6.70E-01                         | 17                                        | 5.4                                          | +                                              | 5.00E-05                                    | 0       | 0                                          | 0                               | 1                                          | 1           |
| 39 | RNA binding protein                         | PC00011  | 1122                        | 39                                        | 59.43                                        | -                                              | 2.66E-03                                    | 26                             | 42.89                             | -                                   | 3.26E-03                         | 223                                       | 114.41                                       | +                                              | 1.75E-20                                    | 0       | 0                                          | 0                               | 1                                          | 1           |
| 40 | RNA helicase                                | PC00094  | 69                          | 5                                         | 3.65                                         | +                                              | 3.04E-01                                    | 6                              | 2.64                              | +                                   | 5.16E-02                         | 20                                        | 7.04                                         | +                                              | 4.61E-05                                    | 0       | 0                                          | 0                               | 1                                          | 1           |
| 41 | small GTPase                                | PC00117  | 158                         | 5                                         | 8.37                                         | -                                              | 1.59E-01                                    | 3                              | 6.04                              | -                                   | 1.47E-01                         | 45                                        | 16.11                                        | +                                              | 2.31E-09                                    | 0       | 0                                          | 0                               | 1                                          | 1           |
| 42 | translation factor                          | PC00201  | 75                          | 4                                         | 3.97                                         | +                                              | 5.61E-01                                    | 0                              | 2.87                              | -                                   | 5.66E-02                         | 29                                        | 7.65                                         | +                                              | 2.78E-09                                    | 0       | 0                                          | 0                               | 1                                          | 1           |
| 43 | viral coat protein                          | PC00237  | 138                         | 2                                         | 7.31                                         | -                                              | 2.32E-02                                    | 1                              | 5.28                              | -                                   | 3.18E-02                         | 2                                         | 14.07                                        | -                                              | 8.59E-05                                    | 0       | 0                                          | 0                               | 1                                          | 1           |
| 44 | viral protein                               | PC00025  | 139                         | 2                                         | 7.36                                         | -                                              | 2.23E-02                                    | 1                              | 5.31                              | -                                   | 3.08E-02                         | 2                                         | 14.17                                        | -                                              | 7.86E-05                                    | 0       | 0                                          | 0                               | 1                                          | 1           |
| 45 | acetyltransferase                           | PC00215  | 108                         | 12                                        | 5.72                                         | +                                              | 1.43E-02                                    | 6                              | 4.13                              | +                                   | 2.35E-01                         | 21                                        | 11.01                                        | +                                              | 4.64E-03                                    | 0       | 0                                          | 0                               | 0                                          | 0           |
| 46 | actin and actin related protein             | PC00041  | 30                          | 0                                         | 1.59                                         | -                                              | 2.04E-01                                    | 4                              | 1.15                              | +                                   | 2.93E-02                         | 6                                         | 3.06                                         | +                                              | 8.99E-02                                    | 0       | 0                                          | 0                               | 0                                          | 0           |
| 47 | actin binding motor protein                 | PC00165  | 8                           | 0                                         | 0.42                                         | -                                              | 6.55E-01                                    | 0                              | 0.31                              | -                                   | 7.36E-01                         | 3                                         | 0.82                                         | +                                              | 4.97E-02                                    | 0       | 0                                          | 0                               | 0                                          | 0           |
| 48 | acyltransferase                             | PC00216  | 83                          | 3                                         | 4.4                                          | -                                              | 3.60E-01                                    | 4                              | 3.17                              | +                                   | 3.92E-01                         | 20                                        | 8.46                                         | +                                              | 4.95E-04                                    | 0       | 0                                          | 0                               | 0                                          | 0           |
| 49 | adenylate cyclase                           | PC00079  | 22                          | 6                                         | 1.17                                         | +                                              | 1.29E-03                                    | 3                              | 0.84                              | +                                   | 5.34E-02                         | 0                                         | 2.24                                         | +                                              | 1.06E-01                                    | 0       | 0                                          | 0                               | 0                                          | 0           |
| 50 | aldolase                                    | PC00144  | 7                           | 0                                         | 0.37                                         | -                                              | 6.90E-01                                    | 1                              | 0.27                              | +                                   | 2.35E-01                         | 1                                         | 0.71                                         | +                                              | 5.10E-01                                    | 0       | 0                                          | 0                               | 0                                          | 0           |
| 51 | amino acid kinase                           | PC00172  | 5                           | 1                                         | 0.26                                         | +                                              | 2.33E-01                                    | 0                              | 0.19                              | -                                   | 8.26E-01                         | 0                                         | 0.51                                         | -                                              | 6.01E-01                                    | 0       | 0                                          | 0                               | 0                                          | 0           |
| 52 | amino acid transporter                      | PC00067  | 106                         | 9                                         | 5.61                                         | +                                              | 1.15E-01                                    | 5                              | 4.05                              | +                                   | 3.81E-01                         | 7                                         | 10.81                                        | -                                              | 1.55E-01                                    | 0       | 0                                          | 0                               | 0                                          | 0           |
| 53 | aminoacyl-tRNA synthetase                   | PC00234  | 20                          | 1                                         | 1.06                                         | -                                              | 7.14E-01                                    | 1                              | 0.76                              | +                                   | 5.35E-01                         | 5                                         | 2.04                                         | +                                              | 5.62E-02                                    | 0       | 0                                          | 0                               | 0                                          | 0           |
| 54 | amylase                                     | PC00053  | 10                          | 0                                         | 0.53                                         | -                                              | 5.89E-01                                    | 1                              | 0.38                              | +                                   | 3.18E-01                         | 0                                         | 1.02                                         | -                                              | 3.61E-01                                    | 0       | 0                                          | 0                               | 0                                          | 0           |
| 55 | anion channel                               | PC00213  | 39                          | 2                                         | 2.07                                         | -                                              | 6.59E-01                                    | 1                              | 1.49                              | -                                   | 5.61E-01                         | 7                                         | 3.98                                         | +                                              | 1.08E-01                                    | 0       | 0                                          | 0                               | 0                                          | 0           |
| 56 | annexin                                     | PC00106  | 9                           | 1                                         | 0.48                                         | +                                              | 3.79E-01                                    | 0                              | 0.34                              | -                                   | 7.09E-01                         | 5                                         | 0.92                                         | +                                              | 2.54E-03                                    | 0       | 0                                          | 0                               | 0                                          | 0           |
| 57 | antibacterial response protein              | PC00149  | 29                          | 1                                         | 1.54                                         | -                                              | 5.46E-01                                    | 1                              | 1.11                              | -                                   | 6.96E-01                         | 0                                         | 2.96                                         | -                                              | 5.19E-02                                    | 0       | 0                                          | 0                               | 0                                          | 0           |
| 58 | apolipoprotein                              | PC00219  | 44                          | 4                                         | 2.33                                         | +                                              | 2.07E-01                                    | 3                              | 1.68                              | +                                   | 2.38E-01                         | 3                                         | 4.49                                         | -                                              | 3.44E-01                                    | 0       | 0                                          | 0                               | 0                                          | 0           |
| 59 | aspartic protease                           | PC00203  | 17                          | 2                                         | 0.9                                          | +                                              | 2.28E-01                                    | 0                              | 0.65                              | -                                   | 5.22E-01                         | 3                                         | 1.73                                         | +                                              | 2.52E-01                                    | 0       | 0                                          | 0                               | 0                                          | 0           |
| 60 | ATP synthase                                | PC00068  | 56                          | 3                                         | 2.97                                         | +                                              | 5.69E-01                                    | 1                              | 2.14                              | -                                   | 3.69E-01                         | 16                                        | 5.71                                         | +                                              | 2.95E-04                                    | 0       | 0                                          | 0                               | 0                                          | 0           |
| 61 | ATP-binding cassette (ABC) transporter      | PC00002  | 79                          | 10                                        | 4.18                                         | +                                              | 1.08E-02                                    | 8                              | 3.02                              | +                                   | 1.22E-02                         | 4                                         | 8.06                                         | +                                              | 9.62E-02                                    | 0       | 0                                          | 0                               | 0                                          | 0           |
| 62 | basic helix-loop-helix transcription factor | PC00024  | 117                         | 4                                         | 6.2                                          | -                                              | 2.59E-01                                    | 3                              | 4.47                              | -                                   | 3.46E-01                         | 13                                        | 11.93                                        | +                                              | 4.16E-01                                    | 0       | 0                                          | 0                               | 0                                          | 0           |
| 63 | basic leucine zipper transcription factor   | PC00055  | 25                          | 3                                         | 1.32                                         | +                                              | 1.48E-01                                    | 3                              | 0.96                              | +                                   | 7.22E-02                         | 6                                         | 2.55                                         | +                                              | 4.53E-02                                    | 0       | 0                                          | 0                               | 0                                          | 0           |
| 64 | calcium channel                             | PC00133  | 31                          | 8                                         | 1.64                                         | +                                              | 3.05E-04                                    | 3                              | 1.19                              | +                                   | 1.17E-01                         | 3                                         | 3.16                                         | -                                              | 6.11E-01                                    | 0       | 0                                          | 0                               | 0                                          | 0           |
| 65 | calsequestrin                               | PC00238  | 2                           | 0                                         | 0.11                                         | -                                              | 8.99E-01                                    | 0                              | 0.08                              | -                                   | 9.26E-01                         | 0                                         | 0.2                                          | -                                              | 8.16E-01                                    | 0       | 0                                          | 0                               | 0                                          | 0           |
| 66 | carbohydrate kinase                         | PC00167  | 38                          | 1                                         | 2.01                                         | -                                              | 4.02E-01                                    | 2                              | 1.45                              | +                                   | 4.26E-01                         | 10                                        | 3.87                                         | +                                              | 6.56E-03                                    | 0       | 0                                          | 0                               | 0                                          | 0           |
| 67 | carbohydrate phosphatase                    | PC00195  | 10                          | 0                                         | 0.53                                         | -                                              | 5.89E-01                                    | 0                              | 0.38                              | -                                   | 6.82E-01                         | 0                                         | 1.02                                         | -                                              | 3.61E-01                                    | 0       | 0                                          | 0                               | 0                                          | 0           |
| 68 | carbohydrate transporter                    | PC00003  | 50                          | 7                                         | 2.65                                         | +                                              | 1.87E-02                                    | 2                              | 1.91                              | +                                   | 5.70E-01                         | 6                                         | 5.1                                          | +                                              | 4.01E-01                                    | 0       | 0                                          | 0                               | 0                                          | 0           |
| 69 | cation transporter                          | PC00239  | 185                         | 23                                        | 9.8                                          | +                                              | 2.10E-04                                    | 4                              | 7.07                              | -                                   | 1.66E-01                         | 27                                        | 18.86                                        | +                                              | 4.47E-02                                    | 0       | 0                                          | 0                               | 0                                          | 0           |

|     | A                                           | B       | C   | D  | E     | F | G        | H  | I     | J | K        | L  | M     | N | O        | P | Q | R | S | T |
|-----|---------------------------------------------|---------|-----|----|-------|---|----------|----|-------|---|----------|----|-------|---|----------|---|---|---|---|---|
| 70  | cell adhesion molecule                      | PC00107 | 116 | 4  | 6.14  | - | 2.66E-01 | 5  | 4.43  | + | 4.56E-01 | 7  | 11.83 | - | 9.68E-02 | 0 | 0 | 0 | 0 | 0 |
| 71  | cell junction protein                       | PC00101 | 85  | 4  | 4.5   | - | 5.31E-01 | 4  | 3.25  | + | 4.09E-01 | 8  | 8.67  | - | 5.00E-01 | 0 | 0 | 0 | 0 | 0 |
| 72  | centromere DNA-binding protein              | PC00017 | 16  | 2  | 0.85  | + | 2.08E-01 | 0  | 0.61  | - | 5.42E-01 | 3  | 1.63  | + | 2.25E-01 | 0 | 0 | 0 | 0 | 0 |
| 73  | chaperonin                                  | PC00072 | 24  | 1  | 1.27  | - | 6.37E-01 | 0  | 0.92  | - | 3.99E-01 | 9  | 2.45  | + | 9.78E-04 | 0 | 0 | 0 | 0 | 0 |
| 74  | chemokine                                   | PC00225 | 53  | 0  | 2.81  | - | 6.02E-02 | 0  | 2.03  | - | 1.32E-01 | 2  | 5.4   | - | 9.43E-02 | 0 | 0 | 0 | 0 | 0 |
| 75  | chromatin/chromatin-binding protein         | PC00118 | 89  | 11 | 4.71  | + | 9.09E-03 | 4  | 3.4   | + | 4.42E-01 | 22 | 9.08  | + | 1.90E-04 | 0 | 0 | 0 | 0 | 0 |
| 76  | CREB transcription factor                   | PC00056 | 25  | 3  | 1.32  | + | 1.48E-01 | 3  | 0.96  | + | 7.22E-02 | 6  | 2.55  | + | 4.53E-02 | 0 | 0 | 0 | 0 | 0 |
| 77  | cyclase                                     | PC00089 | 24  | 6  | 1.27  | + | 1.98E-03 | 3  | 0.92  | + | 6.57E-02 | 0  | 2.45  | - | 8.64E-02 | 0 | 0 | 0 | 0 | 0 |
| 78  | cysteine protease                           | PC00153 | 124 | 10 | 6.57  | + | 1.28E-01 | 8  | 4.74  | + | 1.07E-01 | 18 | 12.64 | + | 9.05E-02 | 0 | 0 | 0 | 0 | 0 |
| 79  | cysteine protease inhibitor                 | PC00154 | 32  | 2  | 1.7   | + | 5.05E-01 | 0  | 1.22  | - | 2.94E-01 | 4  | 3.26  | + | 4.11E-01 | 0 | 0 | 0 | 0 | 0 |
| 80  | cytokine                                    | PC00207 | 178 | 2  | 9.43  | - | 4.32E-03 | 3  | 6.8   | - | 9.18E-02 | 13 | 18.15 | - | 1.34E-01 | 0 | 0 | 0 | 0 | 0 |
| 81  | cytokine receptor                           | PC00205 | 261 | 19 | 13.82 | + | 1.07E-01 | 5  | 9.98  | - | 6.70E-02 | 10 | 26.61 | - | 2.00E-04 | 0 | 0 | 0 | 0 | 0 |
| 82  | damaged DNA-binding protein                 | PC00071 | 44  | 5  | 2.33  | + | 8.72E-02 | 5  | 1.68  | + | 2.84E-02 | 7  | 4.49  | + | 1.67E-01 | 0 | 0 | 0 | 0 | 0 |
| 83  | deacetylase                                 | PC00048 | 2   | 0  | 0.11  | - | 8.99E-01 | 0  | 0.08  | - | 9.26E-01 | 0  | 0.2   | - | 8.16E-01 | 0 | 0 | 0 | 0 | 0 |
| 84  | deaminase                                   | PC00087 | 13  | 1  | 0.69  | + | 4.98E-01 | 2  | 0.5   | + | 8.92E-02 | 2  | 1.33  | + | 3.82E-01 | 0 | 0 | 0 | 0 | 0 |
| 85  | decarboxylase                               | PC00120 | 21  | 1  | 1.11  | - | 6.94E-01 | 1  | 0.8   | + | 5.52E-01 | 6  | 2.14  | + | 2.22E-02 | 0 | 0 | 0 | 0 | 0 |
| 86  | defense/immunity protein                    | PC00047 | 151 | 5  | 8     | - | 1.91E-01 | 3  | 5.77  | - | 1.72E-01 | 9  | 15.4  | - | 5.75E-02 | 0 | 0 | 0 | 0 | 0 |
| 87  | dehydratase                                 | PC00044 | 30  | 1  | 1.59  | - | 5.28E-01 | 3  | 1.15  | + | 1.09E-01 | 4  | 3.06  | + | 3.66E-01 | 0 | 0 | 0 | 0 | 0 |
| 88  | dehydrogenase                               | PC00180 | 263 | 7  | 13.93 | - | 3.22E-02 | 5  | 10.05 | - | 6.41E-02 | 29 | 26.82 | + | 3.61E-01 | 0 | 0 | 0 | 0 | 0 |
| 89  | DNA glycosylase                             | PC00012 | 15  | 0  | 0.79  | - | 4.52E-01 | 0  | 0.57  | - | 5.64E-01 | 1  | 1.53  | - | 5.48E-01 | 0 | 0 | 0 | 0 | 0 |
| 90  | DNA ligase                                  | PC00014 | 10  | 1  | 0.53  | + | 4.11E-01 | 0  | 0.38  | - | 6.82E-01 | 2  | 1.02  | + | 2.71E-01 | 0 | 0 | 0 | 0 | 0 |
| 91  | DNA methyltransferase                       | PC00010 | 17  | 2  | 0.9   | + | 2.28E-01 | 1  | 0.65  | + | 4.78E-01 | 4  | 1.73  | + | 9.82E-02 | 0 | 0 | 0 | 0 | 0 |
| 92  | DNA photolyase                              | PC00199 | 2   | 0  | 0.11  | - | 8.99E-01 | 1  | 0.08  | + | 7.36E-02 | 0  | 0.2   | - | 8.16E-01 | 0 | 0 | 0 | 0 | 0 |
| 93  | DNA polymerase processivity factor          | PC00018 | 2   | 0  | 0.11  | - | 8.99E-01 | 0  | 0.08  | - | 9.26E-01 | 1  | 0.2   | + | 1.84E-01 | 0 | 0 | 0 | 0 | 0 |
| 94  | DNA strand-pairing protein                  | PC00086 | 7   | 0  | 0.37  | - | 6.90E-01 | 0  | 0.27  | - | 7.65E-01 | 0  | 0.71  | - | 4.90E-01 | 0 | 0 | 0 | 0 | 0 |
| 95  | DNA topoisomerase                           | PC00013 | 4   | 0  | 0.21  | - | 8.09E-01 | 0  | 0.15  | - | 8.58E-01 | 1  | 0.41  | + | 3.35E-01 | 0 | 0 | 0 | 0 | 0 |
| 96  | DNA-directed DNA polymerase                 | PC00009 | 10  | 0  | 0.53  | - | 5.89E-01 | 1  | 0.38  | + | 3.18E-01 | 1  | 1.02  | - | 7.29E-01 | 0 | 0 | 0 | 0 | 0 |
| 97  | DNA-directed RNA polymerase                 | PC00200 | 16  | 0  | 0.85  | - | 4.28E-01 | 1  | 0.61  | + | 4.58E-01 | 4  | 1.63  | + | 8.32E-02 | 0 | 0 | 0 | 0 | 0 |
| 98  | endodeoxyribonuclease                       | PC00098 | 18  | 3  | 0.95  | + | 7.19E-02 | 1  | 0.69  | + | 4.98E-01 | 5  | 1.84  | + | 3.90E-02 | 0 | 0 | 0 | 0 | 0 |
| 99  | endoribonuclease                            | PC00099 | 51  | 2  | 2.7   | - | 4.93E-01 | 1  | 1.95  | - | 4.20E-01 | 6  | 5.2   | + | 4.19E-01 | 0 | 0 | 0 | 0 | 0 |
| 100 | epimerase/racemase                          | PC00135 | 7   | 1  | 0.37  | + | 3.10E-01 | 0  | 0.27  | - | 7.65E-01 | 5  | 0.71  | + | 8.54E-04 | 0 | 0 | 0 | 0 | 0 |
| 101 | esterase                                    | PC00186 | 31  | 0  | 1.64  | - | 1.93E-01 | 1  | 1.19  | - | 6.68E-01 | 6  | 3.16  | + | 1.01E-01 | 0 | 0 | 0 | 0 | 0 |
| 102 | exodeoxyribonuclease                        | PC00077 | 1   | 0  | 0.05  | - | 9.48E-01 | 0  | 0.04  | - | 9.62E-01 | 1  | 0.1   | + | 9.69E-02 | 0 | 0 | 0 | 0 | 0 |
| 103 | exoribonuclease                             | PC00202 | 25  | 2  | 1.32  | + | 3.82E-01 | 0  | 0.96  | - | 3.84E-01 | 7  | 2.55  | + | 1.56E-02 | 0 | 0 | 0 | 0 | 0 |
| 104 | extracellular matrix glycoprotein           | PC00103 | 56  | 6  | 2.97  | + | 8.03E-02 | 8  | 2.14  | + | 1.65E-03 | 3  | 5.71  | - | 1.79E-01 | 0 | 0 | 0 | 0 | 0 |
| 105 | extracellular matrix protein                | PC00130 | 78  | 7  | 4.13  | + | 1.25E-01 | 10 | 2.98  | + | 1.03E-03 | 10 | 7.95  | + | 2.77E-01 | 0 | 0 | 0 | 0 | 0 |
| 106 | extracellular matrix structural protein     | PC00102 | 11  | 1  | 0.58  | + | 4.42E-01 | 1  | 0.42  | + | 3.43E-01 | 5  | 1.12  | + | 5.87E-03 | 0 | 0 | 0 | 0 | 0 |
| 107 | galactosidase                               | PC00108 | 10  | 1  | 0.53  | + | 4.11E-01 | 0  | 0.38  | - | 6.82E-01 | 1  | 1.02  | - | 7.29E-01 | 0 | 0 | 0 | 0 | 0 |
| 108 | gap junction                                | PC00070 | 20  | 0  | 1.06  | - | 3.47E-01 | 1  | 0.76  | + | 5.35E-01 | 3  | 2.04  | + | 3.34E-01 | 0 | 0 | 0 | 0 | 0 |
| 109 | glucosidase                                 | PC00110 | 13  | 0  | 0.69  | - | 5.02E-01 | 0  | 0.5   | - | 6.08E-01 | 0  | 1.33  | - | 2.66E-01 | 0 | 0 | 0 | 0 | 0 |
| 110 | glycosidase                                 | PC00196 | 30  | 2  | 1.59  | + | 4.72E-01 | 3  | 1.15  | + | 1.09E-01 | 5  | 3.06  | + | 1.95E-01 | 0 | 0 | 0 | 0 | 0 |
| 111 | growth factor                               | PC00007 | 186 | 7  | 9.85  | - | 2.33E-01 | 5  | 7.11  | - | 2.86E-01 | 14 | 18.97 | - | 1.51E-01 | 0 | 0 | 0 | 0 | 0 |
| 112 | helicase                                    | PC00094 | 5   | 0  | 0.26  | - | 7.67E-01 | 1  | 0.19  | + | 1.74E-01 | 0  | 0.51  | - | 6.01E-01 | 0 | 0 | 0 | 0 | 0 |
| 113 | helix-turn-helix transcription factor       | PC00006 | 290 | 3  | 15.36 | - | 1.49E-04 | 12 | 11.09 | + | 4.31E-01 | 22 | 29.57 | - | 9.12E-02 | 0 | 0 | 0 | 0 | 0 |
| 114 | heterotrimeric G-protein                    | PC00020 | 45  | 1  | 2.38  | - | 3.12E-01 | 4  | 1.72  | + | 9.61E-02 | 9  | 4.59  | + | 4.44E-02 | 0 | 0 | 0 | 0 | 0 |
| 115 | histone                                     | PC00016 | 81  | 1  | 4.29  | - | 7.22E-02 | 3  | 3.1   | - | 6.26E-01 | 10 | 8.26  | + | 3.16E-01 | 0 | 0 | 0 | 0 | 0 |
| 116 | HMG box transcription factor                | PC00029 | 65  | 2  | 3.44  | - | 3.31E-01 | 3  | 2.48  | + | 4.52E-01 | 11 | 6.63  | + | 7.40E-02 | 0 | 0 | 0 | 0 | 0 |
| 117 | homeobox transcription factor               | PC00116 | 290 | 3  | 15.36 | - | 1.49E-04 | 12 | 11.09 | + | 4.31E-01 | 22 | 29.57 | - | 9.12E-02 | 0 | 0 | 0 | 0 | 0 |
| 118 | Hsp70 family chaperone                      | PC00026 | 13  | 0  | 0.69  | - | 5.02E-01 | 0  | 0.5   | - | 6.08E-01 | 3  | 1.33  | + | 1.49E-01 | 0 | 0 | 0 | 0 | 0 |
| 119 | Hsp90 family chaperone                      | PC00027 | 4   | 0  | 0.21  | - | 8.09E-01 | 0  | 0.15  | - | 8.58E-01 | 2  | 0.41  | + | 6.37E-02 | 0 | 0 | 0 | 0 | 0 |
| 120 | hydrolase                                   | PC00187 | 456 | 26 | 24.15 | + | 3.80E-01 | 29 | 17.43 | + | 6.44E-03 | 56 | 46.5  | + | 9.41E-02 | 0 | 0 | 0 | 0 | 0 |
| 121 | hydroxylase                                 | PC00175 | 75  | 2  | 3.97  | - | 2.42E-01 | 2  | 2.87  | - | 4.53E-01 | 5  | 7.65  | - | 2.25E-01 | 0 | 0 | 0 | 0 | 0 |
| 122 | immunoglobulin                              | PC00051 | 68  | 0  | 3.6   | - | 2.71E-02 | 0  | 2.6   | - | 7.41E-02 | 0  | 6.93  | - | 9.66E-04 | 0 | 0 | 0 | 0 | 0 |
| 123 | immunoglobulin receptor superfamily         | PC00075 | 201 | 11 | 10.65 | + | 4.98E-01 | 4  | 7.68  | - | 1.18E-01 | 6  | 20.5  | - | 1.71E-04 | 0 | 0 | 0 | 0 | 0 |
| 124 | immunoglobulin superfamily cell adhesion mo | PC00069 | 40  | 0  | 2.12  | - | 1.20E-01 | 0  | 1.53  | - | 2.16E-01 | 1  | 4.08  | - | 8.58E-02 | 0 | 0 | 0 | 0 | 0 |
| 125 | interferon superfamily                      | PC00128 | 27  | 0  | 1.43  | - | 2.39E-01 | 0  | 1.03  | - | 3.56E-01 | 0  | 2.75  | - | 6.36E-02 | 0 | 0 | 0 | 0 | 0 |
| 126 | interleukin superfamily                     | PC00083 | 35  | 1  | 1.85  | - | 4.47E-01 | 0  | 1.34  | - | 2.62E-01 | 2  | 3.57  | - | 3.08E-01 | 0 | 0 | 0 | 0 | 0 |
| 127 | intermediate filament                       | PC00156 | 10  | 0  | 0.53  | - | 5.89E-01 | 1  | 0.38  | + | 3.18E-01 | 1  | 1.02  | - | 7.29E-01 | 0 | 0 | 0 | 0 | 0 |
| 128 | intermediate filament binding protein       | PC00129 | 10  | 0  | 0.53  | - | 5.89E-01 | 1  | 0.38  | + | 3.18E-01 | 1  | 1.02  | - | 7.29E-01 | 0 | 0 | 0 | 0 | 0 |
| 129 | ion channel                                 | PC00227 | 477 | 42 | 25.27 | + | 1.28E-03 | 21 | 18.23 | + | 2.87E-01 | 28 | 48.64 | - | 8.71E-04 | 0 | 0 | 0 | 0 | 0 |
| 130 | kinase activator                            | PC00140 | 42  | 4  | 2.22  | + | 1.85E-01 | 0  | 1.61  | - | 2.01E-01 | 9  | 4.28  | + | 3.09E-02 | 0 | 0 | 0 | 0 | 0 |
| 131 | kinase inhibitor                            | PC00138 | 16  | 0  | 0.85  | - | 4.28E-01 | 0  | 0.61  | - | 5.42E-01 | 1  | 1.63  | - | 5.15E-01 | 0 | 0 | 0 | 0 | 0 |
| 132 | kinase modulator                            | PC00095 | 105 | 12 | 5.56  | + | 1.17E-02 | 4  | 4.01  | - | 6.26E-01 | 15 | 10.71 | + | 1.25E-01 | 0 | 0 | 0 | 0 | 0 |
| 133 | KRAB box transcription factor               | PC00244 | 421 | 31 | 22.3  | + | 4.54E-02 | 22 | 16.09 | + | 9.15E-02 | 29 | 42.93 | - | 1.53E-02 | 0 | 0 | 0 | 0 | 0 |
| 134 | ligase                                      | PC00160 | 274 | 21 | 14.51 | + | 6.32E-02 | 19 | 10.47 | + | 1.09E-02 | 45 | 27.94 | + | 1.70E-03 | 0 | 0 | 0 | 0 | 0 |
| 135 | lipase                                      | PC00121 | 73  | 0  | 3.87  | - | 2.08E-02 | 4  | 2.79  | + | 3.06E-01 | 3  | 7.44  | - | 6.11E-02 | 0 | 0 | 0 | 0 | 0 |
| 136 | lyase                                       | PC00104 | 112 | 11 | 5.93  | + | 3.96E-02 | 8  | 4.28  | + | 6.93E-02 | 18 | 11.42 | + | 4.30E-02 | 0 | 0 | 0 | 0 | 0 |
| 137 | major histocompatibility complex antigen    | PC00078 | 20  | 3  | 1.06  | + | 9.15E-02 | 2  | 0.76  | + | 1.78E-01 | 2  | 2.04  | - | 6.66E-01 | 0 | 0 | 0 | 0 | 0 |
| 138 | membrane trafficking regulatory protein     | PC00034 | 115 | 9  | 6.09  | + | 1.62E-01 | 7  | 4.4   | + | 1.55E-01 | 20 | 11.73 | + | 1.70E-02 | 0 | 0 | 0 | 0 | 0 |
| 139 | membrane-bound signaling molecule           | PC00162 | 175 | 14 | 9.27  | + | 8.75E-02 | 6  | 6.69  | - | 4.97E-01 | 23 | 17.84 | + | 1.36E-01 | 0 | 0 | 0 | 0 | 0 |
| 140 | metalloprotease                             | PC00190 | 165 | 11 | 8.74  | + | 2.63E-01 | 12 | 6.31  | + | 2.75E-02 | 12 | 16.82 | - | 1.43E-01 | 0 | 0 | 0 | 0 | 0 |
| 141 | metalloprotease inhibitor                   | PC00191 | 4   | 0  | 0.21  | - | 8.09E-01 | 0  | 0.15  | - | 8.58E-01 | 0  | 0.41  | - | 6.65E-01 | 0 |   |   |   |   |

|     | A                                            | B       | C    | D  | E     | F | G        | H  | I     | J | K        | L   | M      | N | O        | P | Q | R | S | T |
|-----|----------------------------------------------|---------|------|----|-------|---|----------|----|-------|---|----------|-----|--------|---|----------|---|---|---|---|---|
| 143 | microtubule binding motor protein            | PC00166 | 53   | 11 | 2.81  | + | 1.64E-04 | 5  | 2.03  | + | 5.49E-02 | 4   | 5.4    | - | 3.72E-01 | 0 | 0 | 0 | 0 | 0 |
| 144 | mitochondrial carrier protein                | PC00046 | 19   | 0  | 1.01  | - | 3.65E-01 | 0  | 0.73  | - | 4.84E-01 | 0   | 1.94   | - | 1.44E-01 | 0 | 0 | 0 | 0 | 0 |
| 145 | mutase                                       | PC00096 | 11   | 0  | 0.58  | - | 5.58E-01 | 1  | 0.42  | + | 3.43E-01 | 3   | 1.12   | + | 1.04E-01 | 0 | 0 | 0 | 0 | 0 |
| 146 | myelin protein                               | PC00211 | 28   | 1  | 1.48  | - | 5.63E-01 | 2  | 1.07  | + | 2.90E-01 | 8   | 2.86   | + | 9.03E-03 | 0 | 0 | 0 | 0 | 0 |
| 147 | neurotrophic factor                          | PC00112 | 9    | 0  | 0.48  | - | 6.21E-01 | 0  | 0.34  | - | 7.09E-01 | 2   | 0.92   | + | 2.34E-01 | 0 | 0 | 0 | 0 | 0 |
| 148 | non-motor microtubule binding protein        | PC00228 | 51   | 9  | 2.7   | + | 1.90E-03 | 2  | 1.95  | + | 5.80E-01 | 15  | 5.2    | + | 3.34E-04 | 0 | 0 | 0 | 0 | 0 |
| 149 | nuclear hormone receptor                     | PC00080 | 47   | 3  | 2.49  | + | 4.54E-01 | 2  | 1.8   | + | 5.36E-01 | 5   | 4.79   | + | 5.22E-01 | 0 | 0 | 0 | 0 | 0 |
| 150 | nuclease                                     | PC00032 | 40   | 2  | 2.12  | - | 6.45E-01 | 4  | 1.53  | + | 6.92E-02 | 10  | 4.08   | + | 9.17E-03 | 0 | 0 | 0 | 0 | 0 |
| 151 | nucleotide kinase                            | PC00065 | 49   | 6  | 2.6   | + | 4.85E-02 | 4  | 1.87  | + | 1.21E-01 | 6   | 5      | + | 3.83E-01 | 0 | 0 | 0 | 0 | 0 |
| 152 | nucleotide phosphatase                       | PC00066 | 37   | 0  | 1.96  | - | 1.41E-01 | 3  | 1.41  | + | 1.70E-01 | 5   | 3.77   | + | 3.27E-01 | 0 | 0 | 0 | 0 | 0 |
| 153 | oxidase                                      | PC00198 | 64   | 1  | 3.39  | - | 1.48E-01 | 2  | 2.45  | - | 5.57E-01 | 6   | 6.53   | - | 5.22E-01 | 0 | 0 | 0 | 0 | 0 |
| 154 | oxygenase                                    | PC00176 | 89   | 2  | 4.71  | - | 1.50E-01 | 2  | 3.4   | - | 3.39E-01 | 7   | 9.08   | - | 3.15E-01 | 0 | 0 | 0 | 0 | 0 |
| 155 | peptide hormone                              | PC00163 | 173  | 10 | 9.16  | + | 4.34E-01 | 7  | 6.61  | + | 4.92E-01 | 28  | 17.64  | + | 1.35E-02 | 0 | 0 | 0 | 0 | 0 |
| 156 | peroxidase                                   | PC00177 | 29   | 1  | 1.54  | - | 5.46E-01 | 0  | 1.11  | - | 3.30E-01 | 0   | 2.96   | - | 5.19E-02 | 0 | 0 | 0 | 0 | 0 |
| 157 | phosphatase                                  | PC00045 | 236  | 20 | 12.5  | + | 3.00E-02 | 16 | 9.02  | + | 2.19E-02 | 44  | 24.06  | + | 1.56E-04 | 0 | 0 | 0 | 0 | 0 |
| 158 | phosphatase activator                        | PC00184 | 1    | 0  | 0.05  | - | 9.48E-01 | 0  | 0.04  | - | 9.62E-01 | 1   | 0.1    | + | 9.69E-02 | 0 | 0 | 0 | 0 | 0 |
| 159 | phosphatase inhibitor                        | PC00182 | 30   | 1  | 1.59  | - | 5.28E-01 | 0  | 1.15  | - | 3.17E-01 | 10  | 3.06   | + | 1.26E-03 | 0 | 0 | 0 | 0 | 0 |
| 160 | phospholipase                                | PC00143 | 39   | 0  | 2.07  | - | 1.27E-01 | 4  | 1.49  | + | 6.44E-02 | 3   | 3.98   | - | 4.38E-01 | 0 | 0 | 0 | 0 | 0 |
| 161 | phosphorylase                                | PC00042 | 14   | 0  | 0.74  | - | 4.76E-01 | 0  | 0.54  | - | 5.85E-01 | 3   | 1.43   | + | 1.73E-01 | 0 | 0 | 0 | 0 | 0 |
| 162 | potassium channel                            | PC00243 | 85   | 14 | 4.5   | + | 2.45E-04 | 6  | 3.25  | + | 1.11E-01 | 10  | 8.67   | + | 3.69E-01 | 0 | 0 | 0 | 0 | 0 |
| 163 | primase                                      | PC00019 | 1    | 0  | 0.05  | - | 9.48E-01 | 0  | 0.04  | - | 9.62E-01 | 1   | 0.1    | + | 9.69E-02 | 0 | 0 | 0 | 0 | 0 |
| 164 | protease                                     | PC00173 | 550  | 32 | 29.13 | + | 3.20E-01 | 31 | 21.03 | + | 2.32E-02 | 60  | 56.08  | + | 3.16E-01 | 0 | 0 | 0 | 0 | 0 |
| 165 | protease inhibitor                           | PC00113 | 162  | 4  | 8.58  | - | 7.03E-02 | 4  | 6.19  | - | 2.59E-01 | 8   | 16.52  | - | 1.63E-02 | 0 | 0 | 0 | 0 | 0 |
| 166 | protein kinase receptor                      | PC00021 | 2    | 0  | 0.11  | - | 8.99E-01 | 0  | 0.08  | - | 9.26E-01 | 0   | 0.2    | - | 8.16E-01 | 0 | 0 | 0 | 0 | 0 |
| 167 | pyrophosphatase                              | PC00088 | 5    | 0  | 0.26  | - | 7.67E-01 | 0  | 0.19  | - | 8.26E-01 | 2   | 0.51   | + | 9.32E-02 | 0 | 0 | 0 | 0 | 0 |
| 168 | reductase                                    | PC00092 | 76   | 2  | 4.03  | - | 2.34E-01 | 2  | 2.91  | - | 4.44E-01 | 11  | 7.75   | + | 1.60E-01 | 0 | 0 | 0 | 0 | 0 |
| 169 | reverse transcriptase                        | PC00031 | 5    | 1  | 0.26  | + | 2.33E-01 | 0  | 0.19  | - | 8.26E-01 | 0   | 0.51   | + | 6.01E-01 | 0 | 0 | 0 | 0 | 0 |
| 170 | ribonucleoprotein                            | PC00148 | 57   | 2  | 3.02  | - | 4.19E-01 | 1  | 2.18  | - | 3.59E-01 | 17  | 5.81   | + | 1.18E-04 | 0 | 0 | 0 | 0 | 0 |
| 171 | RNA methyltransferase                        | PC00189 | 21   | 0  | 1.11  | - | 3.29E-01 | 0  | 0.8   | - | 4.48E-01 | 4   | 2.14   | + | 1.69E-01 | 0 | 0 | 0 | 0 | 0 |
| 172 | serine protease                              | PC00081 | 191  | 5  | 10.12 | - | 6.21E-02 | 9  | 7.3   | + | 3.11E-01 | 10  | 19.48  | - | 1.40E-02 | 0 | 0 | 0 | 0 | 0 |
| 173 | serine protease inhibitor                    | PC00082 | 120  | 2  | 6.36  | - | 4.75E-02 | 4  | 4.59  | - | 5.15E-01 | 3   | 12.24  | - | 1.88E-03 | 0 | 0 | 0 | 0 | 0 |
| 174 | signaling molecule                           | PC00169 | 1047 | 65 | 55.46 | + | 1.09E-01 | 42 | 40.02 | + | 3.97E-01 | 122 | 106.76 | + | 7.49E-02 | 0 | 0 | 0 | 0 | 0 |
| 175 | SNARE protein                                | PC00235 | 41   | 2  | 2.17  | - | 6.30E-01 | 0  | 1.57  | - | 2.08E-01 | 11  | 4.18   | + | 3.90E-03 | 0 | 0 | 0 | 0 | 0 |
| 176 | sodium channel                               | PC00240 | 20   | 2  | 1.06  | + | 2.86E-01 | 0  | 0.76  | - | 4.65E-01 | 2   | 2.04   | - | 6.66E-01 | 0 | 0 | 0 | 0 | 0 |
| 177 | storage protein                              | PC00181 | 25   | 1  | 1.32  | - | 6.18E-01 | 1  | 0.96  | + | 6.16E-01 | 2   | 2.55   | - | 5.31E-01 | 0 | 0 | 0 | 0 | 0 |
| 178 | structural protein                           | PC00226 | 297  | 10 | 15.73 | - | 8.58E-02 | 9  | 11.35 | - | 3.02E-01 | 28  | 30.28  | - | 3.82E-01 | 0 | 0 | 0 | 0 | 0 |
| 179 | surfactant                                   | PC00210 | 14   | 0  | 0.74  | - | 4.76E-01 | 2  | 0.54  | + | 1.01E-01 | 0   | 1.43   | - | 2.40E-01 | 0 | 0 | 0 | 0 | 0 |
| 180 | TGF-beta receptor                            | PC00232 | 2    | 1  | 0.11  | + | 1.01E-01 | 0  | 0.08  | - | 9.26E-01 | 0   | 0.2    | - | 8.16E-01 | 0 | 0 | 0 | 0 | 0 |
| 181 | tight junction                               | PC00105 | 47   | 2  | 2.49  | - | 5.46E-01 | 2  | 1.8   | + | 5.36E-01 | 2   | 4.79   | - | 1.43E-01 | 0 | 0 | 0 | 0 | 0 |
| 182 | transaldolase                                | PC00221 | 1    | 0  | 0.05  | - | 9.48E-01 | 0  | 0.04  | - | 9.62E-01 | 1   | 0.1    | + | 9.69E-02 | 0 | 0 | 0 | 0 | 0 |
| 183 | transaminase                                 | PC00111 | 25   | 2  | 1.32  | + | 3.82E-01 | 1  | 0.96  | + | 6.16E-01 | 5   | 2.55   | + | 1.15E-01 | 0 | 0 | 0 | 0 | 0 |
| 184 | transfer/carrier protein                     | PC00158 | 310  | 9  | 16.42 | - | 3.43E-02 | 13 | 11.85 | + | 4.07E-01 | 49  | 31.61  | + | 2.33E-03 | 0 | 0 | 0 | 0 | 0 |
| 185 | transketolase                                | PC00033 | 5    | 0  | 0.26  | - | 7.67E-01 | 0  | 0.19  | - | 8.26E-01 | 0   | 0.51   | - | 6.01E-01 | 0 | 0 | 0 | 0 | 0 |
| 186 | transmembrane receptor regulatory/adaptor pr | PC00236 | 83   | 13 | 4.4   | + | 6.37E-04 | 11 | 3.17  | + | 4.51E-04 | 8   | 8.46   | - | 5.28E-01 | 0 | 0 | 0 | 0 | 0 |
| 187 | tubulin                                      | PC00157 | 22   | 0  | 1.17  | - | 3.12E-01 | 2  | 0.84  | + | 2.06E-01 | 8   | 2.24   | + | 2.21E-03 | 0 | 0 | 0 | 0 | 0 |
| 188 | tumor necrosis factor family member          | PC00036 | 10   | 0  | 0.53  | - | 5.89E-01 | 0  | 0.38  | - | 6.82E-01 | 1   | 1.02   | - | 7.29E-01 | 0 | 0 | 0 | 0 | 0 |
| 189 | tumor necrosis factor receptor               | PC00035 | 22   | 4  | 1.17  | + | 3.08E-02 | 1  | 0.84  | + | 5.69E-01 | 2   | 2.24   | - | 6.11E-01 | 0 | 0 | 0 | 0 | 0 |
| 190 | type I cytokine receptor                     | PC00084 | 32   | 3  | 1.7   | + | 2.41E-01 | 0  | 1.22  | - | 2.94E-01 | 1   | 3.26   | - | 1.63E-01 | 0 | 0 | 0 | 0 | 0 |
| 191 | ubiquitin-protein ligase                     | PC00012 | 135  | 16 | 7.15  | + | 2.87E-03 | 13 | 5.16  | + | 2.56E-03 | 25  | 13.77  | + | 4.00E-03 | 0 | 0 | 0 | 0 | 0 |
| 192 | vesicle coat protein                         | PC00150 | 32   | 4  | 1.7   | + | 9.23E-02 | 1  | 1.22  | - | 6.54E-01 | 11  | 3.26   | + | 5.76E-04 | 0 | 0 | 0 | 0 | 0 |
| 193 | voltage-gated ion channel                    | PC00080 | 1    | 0  | 0.05  | - | 9.48E-01 | 0  | 0.04  | - | 9.62E-01 | 0   | 0.1    | - | 9.03E-01 | 0 | 0 | 0 | 0 | 0 |
| 194 | zinc finger transcription factor             | PC00218 | 697  | 52 | 36.92 | + | 1.01E-02 | 46 | 26.64 | + | 3.40E-04 | 68  | 71.07  | - | 3.85E-01 | 0 | 0 | 0 | 0 | 0 |
